# Supplementary material for: Development and Validation of a Reduced DME Mechanism Applicable to Various Combustion Modes in Internal Combustion Engines
Source: Hindawi journal article supplement (doi:10.1155/2011/630580), 2011-01-01
Supplement: f1 [file 630580.f1.zip]

Archive with 3 entries (3 files):
- Supplementary Material.pdf
- reduced.ckwyp
- reduced.mec
