# Supplementary material for: Development and Validation of a Reduced DME Mechanism Applicable to Various Combustion Modes in Internal Combustion Engines
Source: Hindawi journal article supplement (doi:10.1155/2011/630580), 2011-01-01
Supplement: f1 [file 630580.f1.zip › reduced.ckwyp]

      SUBROUTINE CKWYP (P, T, Y, ICKWRK, RCKWRK, WDOT)
! This routine can be changed to be compatible with CKWYR by
! replacing the above subroutine heading with the line below
! and by changing the section of computing XCON.
!      SUBROUTINE CKWYR (RHO, T, Y, ICKWRK, RCKWRK, WDOT)
!
!     This routine is automatically produced by CARM
!     for computing sources of reduced mechanism.
!     (Version: 1.2.22      Last updated on Nov-27-09  )
!
!                                                                                 
!
!      SUMMARY OF REDUCED MECHANISM:
!      TOTAL NUMBER OF SPECIES=   28 WITH    24 STEPS
!      TOTAL NUMBER OF STEADY SPECIES=   25
! ( 1)   H + O2 = O + OH                                                        
! ( 2)   H2 + O = H + OH                                                        
! ( 3)   H2 + OH = H + H2O                                                      
! ( 4)   H2 =  2H                                                               
! ( 5)   H + O2 = HO2                                                           
! ( 6)    2HO2 = O2 + H2O2                                                      
! ( 7)   O + CO = CO2                                                           
! ( 8)   CH2O =  2H + CO                                                        
! ( 9)   CH3 + CH2O = H + CH4 + CO                                              
! (10)   CH3 + O = H + CH2O                                                     
! (11)    2CH3 = C2H6                                                           
! (12)   H2O + C2H4 = H + CH3 + CH2O                                            
! (13)   H2O + C2H4 + CH2O = H + CH3 + CO + CH3OH                               
! (14)    2CH3 = H + C2H5                                                       
! (15)   CH2 + CH4 =  2CH3                                                      
! (16)   C2H4 = H2 + C2H2                                                       
! (17)   CO + CH3OCH3 =  2CH3 + CO2                                             
! (18)   H2 + CH3OCH2O2 = H + CH3OCH2O2H                                        
! (19)   HO2 + CH3OCH3 = H2 + OH + CH3OCHO                                      
! (20)   H + O2 + CH3OCH3 = H2 + CH3OCH2O2                                      
! (21)    2CH3OCH2O2 = O2 + CH3OCHO + CH3OCH2OH                                 
! (22)    2CH2O + O2 = HO2CH2OCHO                                               
! (23)   HO2CH2OCHO = OH + HOCH2OCO                                             
! (24)   HOCH2OCO = H + CO + HCOOH                                              
!
!  INPUT
!     P      - Pressure.
!                   cgs units - dynes/cm**2
!     (RHO   - Density.)
!                  (cgs units - gm/cm**3)
!                   Data type - real scalar
!     T      - Temperature.
!                   cgs units - K
!                   Data type - real scalar
!     Y      - Mass fractions of species.
!                   Data type - real array
!                   Dimension Y(*) at least    28 (total number of species)
!                   Species must be arranged in the order of:
!                   Y(  1)=    H               
!                   Y(  2)=    H2              
!                   Y(  3)=    CH2             
!                   Y(  4)=    CH3             
!                   Y(  5)=    O               
!                   Y(  6)=    CH4             
!                   Y(  7)=    OH              
!                   Y(  8)=    H2O             
!                   Y(  9)=    C2H2            
!                   Y( 10)=    CO              
!                   Y( 11)=    C2H4            
!                   Y( 12)=    C2H5            
!                   Y( 13)=    CH2O            
!                   Y( 14)=    C2H6            
!                   Y( 15)=    O2              
!                   Y( 16)=    CH3OH           
!                   Y( 17)=    HO2             
!                   Y( 18)=    H2O2            
!                   Y( 19)=    CO2             
!                   Y( 20)=    HCOOH           
!                   Y( 21)=    CH3OCH3         
!                   Y( 22)=    CH3OCHO         
!                   Y( 23)=    CH3OCH2OH       
!                   Y( 24)=    HOCH2OCO        
!                   Y( 25)=    CH3OCH2O2       
!                   Y( 26)=    CH3OCH2O2H      
!                   Y( 27)=    HO2CH2OCHO      
!                   Y( 28)=    N2              
!     ICKWRK - Dummy Array of integer workspace.
!                   Data type - integer array
!                   (Not used; simply to be Compatible with Chemkin)
!     RCKWRK - Dummy Array of real work space.
!                   Data type - real array
!                   (Not used; simply to be Compatible with Chemkin)
!
!  OUTPUT
!     WDOT   - Chemical molar production rates of the species.
!                   cgs units - moles/(cm**3*sec)
!                   Data type - real array
!                   Dimension WDOT(*) at least   28
!
!  END PROLOGUE
!
!*****double precision
        IMPLICIT DOUBLE PRECISION (A-H, O-Z), INTEGER (I-N)
!*****END double precision
!*****single precision
!        IMPLICIT REAL (A-H, O-Z), INTEGER (I-N)
!*****END single precision
!
      PARAMETER (IGLO=24,IREAC=285,KK=28)                               
!   User Specific Parameters:
!   NITER= Max. number of fixed iterations for QSS species.
!   ATOL1= absolute tolerance, RTOL1=relative tolerance
!   Convegence criterion: 
!     abs(Yss_n+1 -Yss_n)<= Max(Atol, Rtol*Yss_n+1)
      PARAMETER (NITER=30, ATOL=1.D-15, RTOL=1.D-5)
! This version builds a look-up table for
!  storing elementary rates. The following parameters
!  are set as default values in SUBROUTINE ELEMRATE.
!     PARAMETER(ITAB=10000)
!     PARAMETER(THIGH=3500.,TLOW=250., IOPT=1)
!     ITAB=  total number of grids in the look-up table
!     THIGH= upper limit of temperature [k]
!     TLOW= lower limit of temperature [k]
!     IOPT= 1: Use look-up table
!           2: Direct evalution
!     These parameters can be reset in SUBROUTINE ELEMRATE.
      DIMENSION ICKWRK(*), RCKWRK(*), Y(KK), WDOT(KK)
      DIMENSION XM(IREAC), RF(IREAC), RB(IREAC), W(IREAC)
      DIMENSION RKF(IGLO), XCON(KK), WT(KK)
      DIMENSION B(25), ABV(25), DEN(25)                                 
! COMMON BLOCK FOR STEADY STATE SPECIES (- Mole Fraction )
      COMMON/SSNUM/KSS
      CHARACTER*16 NAME
      COMMON/SSNAM/NAME(500)
      COMMON/SSMOL/XSS(500)
! END OF BLOCK FOR STEADY STATE SPECIES 

      LOGICAL LITER, CONV, LBOUND(25)                                   
      SAVE TOLD, RF, RB, DEN, XM, ABV
      DATA SMALL/1.D-50/,TOLD/0.D0/
      DATA RU/8.314510D7/
      DATA WT/  1.008D0,  2.016D0, 14.027D0, 15.035D0, 15.999D0,                
     &         16.043D0, 17.007D0, 18.015D0, 26.038D0, 28.011D0,                
     &         28.054D0, 29.062D0, 30.026D0, 30.070D0, 31.999D0,                
     &         32.042D0, 33.007D0, 34.015D0, 44.010D0, 46.026D0,                
     &         46.070D0, 60.053D0, 62.069D0, 75.044D0, 77.060D0,                
     &         78.068D0, 92.052D0, 28.013D0/                                    
!  Change ISSO to 1 for storing QSS in common block                     
      DATA KSS, ISSO/25,0/                                              
      DATA NAME/'OCH2OCHO','HCCOH','HOCH2O','OCHO','C2H','C2H3',                
     & 'CH3OCH2','CH3O','CH2OH','CH2S','CH3OCH2O','CH3OCO','CH3CO',             
     & 'CH2OCH2O2H','O2CH2OCH2O2H','C2H4OH','HOC2H4O2','CH3CH2O',               
     & 'C2H5OH','CH3CHOH','HCO','CH2CO','CH2HCO','HCCO','CH3HCO'                
     & , 475*' '/                                                       
!
!   compute concentrations from mass fractions 
! section for routine compatible with CKWYP
      SUMYOW = 0.0D0
      DO K = 1, KK
        SUMYOW = SUMYOW + Y(K)/WT(K)
      ENDDO
      SUMYOW = SUMYOW*T*RU
      DO K = 1, KK
        XCON(K) = P*Y(K) / ( SUMYOW*WT(K) )
      ENDDO
! Replacing the above section by following lines for CKWYR
!      DO K = 1, KK
!        XCON(K) = RHO*Y(K) / WT(K) 
!      ENDDO
!
!   SET LOCAL VALUES FOR THE CONCENTRATIONS
!
      XH = MAX( XCON(1), 0.D0  )                                                
      XH2 = MAX( XCON(2), 0.D0  )                                               
      XCH2 = MAX( XCON(3), 0.D0  )                                              
      XCH3 = MAX( XCON(4), 0.D0  )                                              
      XO = MAX( XCON(5), 0.D0  )                                                
      XCH4 = MAX( XCON(6), 0.D0  )                                              
      XOH = MAX( XCON(7), 0.D0  )                                               
      XH2O = MAX( XCON(8), 0.D0  )                                              
      XC2H2 = MAX( XCON(9), 0.D0  )                                             
      XCO = MAX( XCON(10), 0.D0  )                                              
      XC2H4 = MAX( XCON(11), 0.D0  )                                            
      XC2H5 = MAX( XCON(12), 0.D0  )                                            
      XCH2O = MAX( XCON(13), 0.D0  )                                            
      XC2H6 = MAX( XCON(14), 0.D0  )                                            
      XO2 = MAX( XCON(15), 0.D0  )                                              
      XCH3OH = MAX( XCON(16), 0.D0  )                                           
      XHO2 = MAX( XCON(17), 0.D0  )                                             
      XH2O2 = MAX( XCON(18), 0.D0  )                                            
      XCO2 = MAX( XCON(19), 0.D0  )                                             
      XHCOOH = MAX( XCON(20), 0.D0  )                                           
      XCH3OCH3 = MAX( XCON(21), 0.D0  )                                         
      XCH3OCHO = MAX( XCON(22), 0.D0  )                                         
      XCH3OCH2OH = MAX( XCON(23), 0.D0  )                                       
      XHOCH2OCO = MAX( XCON(24), 0.D0  )                                        
      XCH3OCH2O2 = MAX( XCON(25), 0.D0  )                                       
      XCH3OCH2O2H = MAX( XCON(26), 0.D0  )                                      
      XHO2CH2OCHO = MAX( XCON(27), 0.D0  )                                      
      XN2 = MAX( XCON(28), 0.D0  )                                              

      BIG = 0.0D0
      DO K = 1, KK
        BIG = MAX( BIG, XCON(K) )
        WDOT(K) = 0.0D0
        END DO
!
!   EFFECTIVE THIRD BODY FOR ALL REACTIONS
!
      CALL THIRDB( XM, XH, XH2, XCH2, XCH3, XO, XCH4, XOH, XH2O, XC2H2,         
     &             XCO, XC2H4, XC2H5, XCH2O, XC2H6, XO2, XCH3OH, XHO2,          
     &             XH2O2, XCO2, XHCOOH, XCH3OCH3, XCH3OCHO, XCH3OCH2OH,         
     &             XHOCH2OCO, XCH3OCH2O2, XCH3OCH2O2H, XHO2CH2OCHO, XN2         
     &           )                                                              
!
!   SET THE ELEMENTARY RATES
!
      CALL ELEMRATE( RF, RB, T, XM,  IREAC, TOLD, P)
!
!   EXPRESSIONS FOR STEADY-STATE SPECIES
!
      DO 40 K = 1, KSS
        B(K) = 0.0D0
        LBOUND(K) = .TRUE.
 40   CONTINUE
      CALL UPVALUE( 1, B, BIG, LBOUND, ATOL, RTOL, CONV, XOCH2OCHO,             
     &    XHCCOH, XHOCH2O, XOCHO, XC2H, XC2H3, XCH3OCH2, XCH3O, XCH2OH,         
     &    XCH2S, XCH3OCH2O, XCH3OCO, XCH3CO, XCH2OCH2O2H, XO2CH2OCH2O2H,        
     &    XC2H4OH, XHOC2H4O2, XCH3CH2O, XC2H5OH, XCH3CHOH, XHCO, XCH2CO,        
     &    XCH2HCO, XHCCO, XCH3HCO )                                             
      ADJ = 1.D0/BIG
      LITER=.TRUE.
      DO 30 N = 1, NITER

        CONV=.TRUE.
        CALL STEADYE( ABV, DEN, RF, RB, XM, ADJ, SMALL, ATOL, RTOL,
     &   CONV, LBOUND, N, NITER, XH, XH2, XCH2, XCH2S, XCH3, XO, XCH4,          
     &    XOH, XH2O, XC2H, XC2H2, XC2H3, XCO, XC2H4, XHCO, XC2H5, XCH2O,        
     &    XC2H6, XCH2OH, XCH3O, XO2, XCH3OH, XHO2, XH2O2, XHCCO, XCH2CO,        
     &    XHCCOH, XCH2HCO, XCH3CO, XCO2, XCH3HCO, XOCHO, XCH3CHOH,              
     &    XC2H4OH, XCH3CH2O, XCH3OCH2, XHCOOH, XCH3OCH3, XC2H5OH,               
     &    XHOCH2O, XCH3OCO, XCH3OCHO, XCH3OCH2O, XCH3OCH2OH, XOCH2OCHO,         
     &    XHOCH2OCO, XHOC2H4O2, XCH3OCH2O2, XCH2OCH2O2H, XCH3OCH2O2H,           
     &    XHO2CH2OCHO, XO2CH2OCH2O2H, XN2 )                                     

        IF( LITER .AND. CONV) GO TO 35


 30   CONTINUE

 35   CONTINUE
!
!   SET LOCAL VALUES FOR THE CONCENTRATIONS:
!   THIS SETTING IS FOUND USEFUL FOR SENKIN
!   WITH ERROR SETTINGS ATOL=1.E-11 AND RTOL=1.E-6.
!   IF CONVERGENCE PROBLEM ARISES WHEN USING DVODE,
!   THIS SECTION MAY BE COMMENTED OUT.
!
      XH = XCON(1)                      
      XH2 = XCON(2)                     
      XCH2 = XCON(3)                    
      XCH3 = XCON(4)                    
      XO = XCON(5)                      
      XCH4 = XCON(6)                    
      XOH = XCON(7)                     
      XH2O = XCON(8)                    
      XC2H2 = XCON(9)                   
      XCO = XCON(10)                    
      XC2H4 = XCON(11)                  
      XC2H5 = XCON(12)                  
      XCH2O = XCON(13)                  
      XC2H6 = XCON(14)                  
      XO2 = XCON(15)                    
      XCH3OH = XCON(16)                 
      XHO2 = XCON(17)                   
      XH2O2 = XCON(18)                  
      XCO2 = XCON(19)                   
      XHCOOH = XCON(20)                 
      XCH3OCH3 = XCON(21)               
      XCH3OCHO = XCON(22)               
      XCH3OCH2OH = XCON(23)             
      XHOCH2OCO = XCON(24)              
      XCH3OCH2O2 = XCON(25)             
      XCH3OCH2O2H = XCON(26)            
      XHO2CH2OCHO = XCON(27)            
      XN2 = XCON(28)                    
!
!   NET PRODUCTION RATES FOR SKELETAL MECHANISM
!
      CALL NETRATE( W, RF, RB, XM, XH, XH2, XCH2, XCH2S, XCH3, XO, XCH4,        
     &  XOH, XH2O, XC2H, XC2H2, XC2H3, XCO, XC2H4, XHCO, XC2H5, XCH2O,          
     &  XC2H6, XCH2OH, XCH3O, XO2, XCH3OH, XHO2, XH2O2, XHCCO, XCH2CO,          
     &  XHCCOH, XCH2HCO, XCH3CO, XCO2, XCH3HCO, XOCHO, XCH3CHOH,                
     &  XC2H4OH, XCH3CH2O, XCH3OCH2, XHCOOH, XCH3OCH3, XC2H5OH, XHOCH2O,        
     &  XCH3OCO, XCH3OCHO, XCH3OCH2O, XCH3OCH2OH, XOCH2OCHO, XHOCH2OCO,         
     &  XHOC2H4O2, XCH3OCH2O2, XCH2OCH2O2H, XCH3OCH2O2H, XHO2CH2OCHO,           
     &  XO2CH2OCH2O2H, XN2 )                                                    
!
!   SPECIES CHEMICAL SOURCES
!
! H                                                                             
      WDOT(1) = - W(1) + W(2) + W(3) + 2.*W(5) - W(7) - W(8) - W(9)             
     &          - W(10) - W(11) - W(17) - W(18) + W(25) + W(26) - W(28)         
     &          + W(31) + W(32) + W(36) - W(38) + W(44) - W(49) - W(50)         
     &          + W(55) - W(56) - W(57) + W(67) - W(68) - W(78) - W(79)         
     &          - W(80) - W(81) + W(90) + W(95) + W(96) - W(97) - W(99)         
     &          - W(105) - W(106) + W(111) - W(113) - W(114) - W(115)           
     &          - W(122) + W(123) - W(130) + W(131) + W(134) + W(135)           
     &          - W(139) + W(140) + W(142) - W(146) + W(147) + W(149)           
     &          - W(150) + W(151) + W(152) + W(153) + W(163) + W(164)           
     &          + W(165) + W(166) - W(175) - W(176) - W(183) - W(184)           
     &          - W(188) - W(189) + W(193) + W(197) - W(203) - W(204)           
     &          - W(205) + W(215) - W(219) - W(220) - W(225) - W(226)           
     &          + W(229) - W(236) + W(247) - W(253) + W(258) + W(274)           
     &          + W(279) - W(282)                                               
! H2                                                                            
      WDOT(2) = - W(2) - W(3) - W(5) + W(10) + W(18) + W(28) + W(33)            
     &          + W(37) + W(38) + W(50) + W(56) + W(80) + W(81) + W(99)         
     &          + W(106) + W(112) + W(115) + W(122) - W(149) - W(153)           
     &          + W(157) + W(162) - W(165) + W(175) + W(176) + W(184)           
     &          + W(189) + W(203) + W(204) + W(205) + W(236) + W(253)           
     &          + W(277) + W(281) + W(282)                                      
! CH2                                                                           
      WDOT(3) = - W(91) + W(93) - W(95) + W(133) - W(143) - W(150)              
     &          - W(151) - W(152) - W(153) - W(154) - W(155) - W(156)           
     &          - 2.*W(157) + W(158) + W(159) + W(160) + W(161)                 
     &          + W(182)                                                        
! CH3                                                                           
      WDOT(4) = - W(34) - W(43) - W(44) - W(45) - W(46) - W(47)                 
     &          - 2.*W(48) - W(49) + W(50) + W(51) + W(52) - W(53)              
     &          + W(54) + W(57) + W(68) + W(74) - W(77) - W(88)                 
     &          - 2.*W(90) + 2.*W(91) + 2.*W(92) - W(93) - W(94)                
     &          - W(95) - W(96) - W(104) + W(107) - W(117) + W(118)             
     &          - W(125) + W(137) - W(145) + W(150) + W(153) + W(165)           
     &          + W(169) + W(170) - W(177) - W(178) + W(183) + W(188)           
     &          - W(193) + W(196) + W(198) - W(209) - W(210) - W(211)           
     &          + W(216) + W(219) + W(226) + W(234) - W(237) + W(243)           
     &          + W(248) - W(254) + W(257) - W(283)                             
! O                                                                             
      WDOT(5) = + W(1) - W(2) - W(4) - 2.*W(6) - W(7) - W(12) - W(19)           
     &          - W(22) + W(23) - W(29) - W(31) - W(39) - W(44) + W(45)         
     &          - W(51) - W(58) - W(69) - W(82) - W(100) - W(107)               
     &          - W(111) - W(118) - W(120) - W(123) + W(129) - W(131)           
     &          - W(132) - W(133) - W(140) - W(151) - W(162) - W(163)           
     &          - W(173) - W(174) - W(182) - W(185) - W(190) - W(206)           
     &          - W(207) - W(208) - W(224) - W(238) - W(252) - W(285)           
! CH4                                                                           
      WDOT(6) = + W(34) + W(43) + W(49) - W(50) - W(51) - W(52) + W(53)         
     &          - W(54) + W(88) - W(91) - W(92) + W(104) + W(117)               
     &          + W(125) + W(177) + W(178) + W(209) + W(210) + W(211)           
     &          + W(237) + W(254) + W(283)                                      
! OH                                                                            
      WDOT(7) = + W(1) + W(2) - W(3) + 2.*W(4) + W(7) - W(8) + 2.*W(11)         
     &          + W(12) - W(13) + 2.*W(16) + W(17) + W(19) - W(20)              
     &          - W(21) + W(24) - W(25) + W(29) - W(30) + W(32) + W(39)         
     &          - W(40) + W(46) + W(47) + W(51) - W(52) + W(57) + W(58)         
     &          - W(59) + W(68) + W(69) - W(70) - W(77) + W(82) - W(83)         
     &          - W(84) - W(93) - W(94) + W(100) - W(101) - W(116)              
     &          - W(119) + W(120) + W(132) - W(134) - W(135) - W(136)           
     &          - W(137) + W(138) + W(141) - W(142) - W(147) - W(152)           
     &          + W(154) + W(155) - W(164) + W(166) - W(171) - W(172)           
     &          + W(173) + W(174) + W(185) - W(186) - W(187) - W(191)           
     &          + W(192) + W(194) - W(200) - W(201) - W(202) + W(206)           
     &          + W(207) + W(208) - W(221) + W(224) + 2.*W(227)                 
     &          - W(228) + W(231) - W(232) + W(233) - W(235) + W(238)           
     &          + W(246) - W(250) + W(252) + W(263) + W(267) + W(269)           
     &          + W(270) - W(275) + W(278) - W(279) + W(282) + W(283)           
     &          + W(284) + 2.*W(285)                                            
! H2O                                                                           
      WDOT(8) = + W(3) - W(4) + W(8) + W(13) + W(17) + W(20) + W(21)            
     &          + W(30) + W(40) + W(52) + W(59) + W(70) + W(83) + W(84)         
     &          + W(93) + W(94) + W(97) - W(98) + W(101) + W(116)               
     &          + W(119) + W(136) + W(167) + W(171) + W(172) + W(186)           
     &          + W(191) + W(199) + W(200) + W(201) + W(202) + W(220)           
     &          + W(221) + W(225) + W(228) + W(235) + W(250) + W(276)           
     &          + W(279) + W(280)                                               
! C2H2                                                                          
      WDOT(9) = + W(112) + W(119) + W(122) + W(125) + W(126) + W(128)           
     &          - W(130) - W(131) - W(132) - W(133) - W(134) - W(135)           
     &          - W(136) - W(137) - W(138) + W(144) + W(146) + W(149)           
     &          + W(157)                                                        
! CO                                                                            
      WDOT(10) = - W(22) - W(23) - W(24) - W(25) + W(26) + W(27)                
     &           + W(28) + W(29) + W(30) + 2.*W(33) + W(34) + W(35)             
     &           + W(37) + W(63) - W(74) + W(75) + W(110) + W(133)              
     &           + W(137) + W(139) + 2.*W(140) + 2.*W(141) + W(142)             
     &           + W(143) + 2.*W(144) + W(145) + W(148) - W(156)                
     &           + W(162) + W(166) + W(167) + W(168) + W(170) + W(183)          
     &           + W(187) + W(192) + W(193) + W(196) - W(218) + W(256)          
     &           + W(272) + W(276) + W(280) + W(282) + W(283) + W(284)          
     &           + W(285)                                                       
! C2H4                                                                          
      WDOT(11) = + W(95) + W(96) + W(106) + W(108) + W(109) - W(112)            
     &           - W(113) + W(114) - W(115) - W(116) - W(117) - W(118)          
     &           - W(120) - W(121) + W(124) + W(126) + W(145) + W(199)          
     &           + W(220) + W(225) - W(232)                                     
! C2H5                                                                          
      WDOT(12) = + W(90) + W(99) + W(100) + W(101) + W(102) + W(103)            
     &           + W(104) - W(105) - W(106) - W(107) - W(108)                   
     &           - 2.*W(109) - W(110) - W(111) + W(113) + W(193)                
     &           + W(218) - W(233)                                              
! CH2O                                                                          
      WDOT(13) = + W(35) - W(36) - W(37) - W(38) - W(39) - W(40)                
     &           - W(41) - W(42) - W(43) + W(44) + W(46) + W(55)                
     &           + W(56) + W(58) + W(59) + W(60) + W(61) + W(62)                
     &           + 2.*W(64) + W(65) + W(66) + W(67) + W(69) + W(70)             
     &           + W(71) + W(72) + W(73) + W(76) + W(86) + W(107)               
     &           + W(127) + W(152) + W(155) + W(164) + W(168) + W(190)          
     &           + W(192) + W(194) + W(216) + 2.*W(231) + W(243)                
     &           + W(244) - W(245) - W(260) + W(264) + 2.*W(267)                
     &           - W(275)                                                       
! C2H6                                                                          
      WDOT(14) = + W(48) - W(99) - W(100) - W(101) - W(102) - W(103)            
     &           - W(104) + W(105) + W(109) + W(110)                            
! O2                                                                            
      WDOT(15) = - W(1) + W(6) - W(9) + W(10) + W(12) + W(13) + W(14)           
     &           + W(15) - W(23) - W(27) - W(41) - W(45) - W(46)                
     &           + W(53) - W(60) - W(61) - W(71) - W(72) - W(85)                
     &           - W(102) - W(108) - W(121) - W(127) - W(128) - W(129)          
     &           - W(141) - W(148) - W(154) - W(166) - W(167) - W(181)          
     &           - W(192) + W(195) - W(217) - W(222) - W(223) - W(230)          
     &           - W(240) - W(249) - W(259) + W(261) + W(262) - W(265)          
     &           - W(268)                                                       
! CH3OH                                                                         
      WDOT(16) = + W(63) + W(65) + W(66) + W(75) + W(76) + W(77)                
     &           + W(78) + W(79) - W(80) - W(81) - W(82) - W(83)                
     &           - W(84) - W(85) - W(86) - W(87) - W(88) + W(98)                
     &           + W(241) + W(255)                                              
! HO2                                                                           
      WDOT(17) = + W(9) - W(10) - W(11) - W(12) - W(13) - 2.*W(14)              
     &           - 2.*W(15) + W(18) + W(19) + W(20) + W(21) - W(24)             
     &           + W(27) - W(32) + W(41) - W(42) - W(47) - W(53)                
     &           - W(54) + W(60) + W(61) - W(62) + W(71) + W(72)                
     &           - W(73) + W(85) - W(87) + W(102) - W(103) + W(108)             
     &           + W(121) + W(124) + W(128) - W(138) - W(155) - W(179)          
     &           - W(180) + W(181) - W(194) - W(195) - W(212) - W(213)          
     &           - W(214) + W(217) + W(222) + W(223) - W(227) - W(233)          
     &           - W(239) + W(240) - W(246) + W(249) - W(251) + W(265)          
     &           - W(284)                                                       
! H2O2                                                                          
      WDOT(18) = + W(14) + W(15) - W(16) - W(17) - W(18) - W(19)                
     &           - W(20) - W(21) + W(42) + W(54) + W(62) + W(73)                
     &           + W(87) + W(103) - W(124) + W(179) + W(180) + W(212)           
     &           + W(213) + W(214) + W(239) + W(251) + W(284)                   
! CO2                                                                           
      WDOT(19) = + W(22) + W(23) + W(24) + W(25) + W(31) + W(32)                
     &           + W(74) - W(168) + W(182) + W(218) + W(257) + W(258)           
     &           + W(273) + W(277) + W(279) + W(281)                            
! HCOOH                                                                         
      WDOT(20) = + W(274) - W(276) - W(277) - W(278) - W(279) - W(280)          
     &           - W(281) - W(282) - W(283) - W(284) - W(285)                   
! CH3OCH3                                                                       
      WDOT(21) = - W(234) - W(235) - W(236) - W(237) - W(238) - W(239)          
     &           - W(240) - W(241) - W(242) + W(244) + W(245)                   
! CH3OCHO                                                                       
      WDOT(22) = + W(247) - W(248) - W(249) - W(250) - W(251) - W(252)          
     &           - W(253) - W(254) - W(255) + W(262) + W(265)                   
! CH3OCH2OH                                                                     
      WDOT(23) = + W(262)                                                       
! HOCH2OCO                                                                      
      WDOT(24) = + W(271) - W(272) - W(273)                                     
! CH3OCH2O2                                                                     
      WDOT(25) = - W(242) + W(259) - W(260) - 2.*W(261) - 2.*W(262)             
     &           - W(266)                                                       
! CH3OCH2O2H                                                                    
      WDOT(26) = + W(242) + W(260) - W(263)                                     
! HO2CH2OCHO                                                                    
      WDOT(27) = + W(269) - W(270)                                              
! N2                                                                            
      WDOT(28) = 0.0                                                            

!     DO K = 1, KK
!       IF( XCON(K) .LE. 0.D0 .AND. WDOT(K) .LT. 0.D0 ) WDOT(K) = 0.D0
!     END DO
      IF(ISSO .EQ. 1) THEN

      CALL STEADYS(KK, XCON, KSS, XSS,
     &  XOCH2OCHO, XHCCOH, XHOCH2O, XOCHO, XC2H, XC2H3, XCH3OCH2, XCH3O,        
     &  XCH2OH, XCH2S, XCH3OCH2O, XCH3OCO, XCH3CO, XCH2OCH2O2H,                 
     &  XO2CH2OCH2O2H, XC2H4OH, XHOC2H4O2, XCH3CH2O, XC2H5OH, XCH3CHOH,         
     &  XHCO, XCH2CO, XCH2HCO, XHCCO, XCH3HCO )                                 
      END IF

      RETURN
      END
      SUBROUTINE THIRDB( XM, XH, XH2, XCH2, XCH3, XO, XCH4, XOH, XH2O,          
     &                   XC2H2, XCO, XC2H4, XC2H5, XCH2O, XC2H6, XO2,           
     &                   XCH3OH, XHO2, XH2O2, XCO2, XHCOOH, XCH3OCH3,           
     &                   XCH3OCHO, XCH3OCH2OH, XHOCH2OCO, XCH3OCH2O2,           
     &                   XCH3OCH2O2H, XHO2CH2OCHO, XN2 )                        

!*****double precision
        IMPLICIT DOUBLE PRECISION (A-H, O-Z), INTEGER (I-N)
!*****END double precision
!*****single precision
!       IMPLICIT REAL (A-H, O-Z), INTEGER (I-N)
!*****END single precision

      DIMENSION XM(*)
!
!   EFFECTIVE THIRD BODY FOR ALL REACTIONS
!
      XM(5) = +XH+ 2.500*XH2+XCH2+XCH3+XO+XCH4+XOH+12.000*XH2O+XC2H2            
     &        + 1.900*XCO+XC2H4+XC2H5+XCH2O+XC2H6+XO2+XCH3OH+XHO2+XH2O2         
     &        + 3.800*XCO2+XHCOOH+XCH3OCH3+XCH3OCHO+XCH3OCH2OH+XHOCH2OCO        
     &        +XCH3OCH2O2+XCH3OCH2O2H+XHO2CH2OCHO+XN2                           
      XM(6) = +XH+ 2.500*XH2+XCH2+XCH3+XO+XCH4+XOH+12.000*XH2O+XC2H2            
     &        + 1.900*XCO+XC2H4+XC2H5+XCH2O+XC2H6+XO2+XCH3OH+XHO2+XH2O2         
     &        + 3.800*XCO2+XHCOOH+XCH3OCH3+XCH3OCHO+XCH3OCH2OH+XHOCH2OCO        
     &        +XCH3OCH2O2+XCH3OCH2O2H+XHO2CH2OCHO+XN2                           
      XM(7) = +XH+ 2.500*XH2+XCH2+XCH3+XO+XCH4+XOH+12.000*XH2O+XC2H2            
     &        + 1.900*XCO+XC2H4+XC2H5+XCH2O+XC2H6+XO2+XCH3OH+XHO2+XH2O2         
     &        + 3.800*XCO2+XHCOOH+XCH3OCH3+XCH3OCHO+XCH3OCH2OH+XHOCH2OCO        
     &        +XCH3OCH2O2+XCH3OCH2O2H+XHO2CH2OCHO+XN2                           
      XM(8) = +XH+ 2.500*XH2+XCH2+XCH3+XO+XCH4+XOH+12.000*XH2O+XC2H2            
     &        + 1.900*XCO+XC2H4+XC2H5+XCH2O+XC2H6+XO2+XCH3OH+XHO2+XH2O2         
     &        + 3.800*XCO2+XHCOOH+XCH3OCH3+XCH3OCHO+XCH3OCH2OH+XHOCH2OCO        
     &        +XCH3OCH2O2+XCH3OCH2O2H+XHO2CH2OCHO+XN2                           
      XM(9) = +XH+ 2.000*XH2+XCH2+XCH3+XO+XCH4+XOH+11.000*XH2O+XC2H2            
     &        + 1.900*XCO+XC2H4+XC2H5+XCH2O+XC2H6+ 0.780*XO2+XCH3OH+XHO2        
     &        +XH2O2+ 3.800*XCO2+XHCOOH+XCH3OCH3+XCH3OCHO+XCH3OCH2OH            
     &        +XHOCH2OCO+XCH3OCH2O2+XCH3OCH2O2H+XHO2CH2OCHO+XN2                 
      XM(16) = +XH+ 2.500*XH2+XCH2+XCH3+XO+XCH4+XOH+12.000*XH2O+XC2H2           
     &         + 1.900*XCO+XC2H4+XC2H5+XCH2O+XC2H6+XO2+XCH3OH+XHO2+XH2O2        
     &         + 3.800*XCO2+XHCOOH+XCH3OCH3+XCH3OCHO+XCH3OCH2OH                 
     &         +XHOCH2OCO+XCH3OCH2O2+XCH3OCH2O2H+XHO2CH2OCHO+XN2                
      XM(22) = +XH+ 2.500*XH2+XCH2+XCH3+XO+XCH4+XOH+12.000*XH2O+XC2H2           
     &         + 1.900*XCO+XC2H4+XC2H5+XCH2O+XC2H6+XO2+XCH3OH+XHO2+XH2O2        
     &         + 3.800*XCO2+XHCOOH+XCH3OCH3+XCH3OCHO+XCH3OCH2OH                 
     &         +XHOCH2OCO+XCH3OCH2O2+XCH3OCH2O2H+XHO2CH2OCHO+XN2                
      XM(26) = +XH+ 2.500*XH2+XCH2+XCH3+XO+XCH4+XOH+ 6.000*XH2O+XC2H2           
     &         + 1.900*XCO+XC2H4+XC2H5+XCH2O+XC2H6+XO2+XCH3OH+XHO2+XH2O2        
     &         + 3.800*XCO2+XHCOOH+XCH3OCH3+XCH3OCHO+XCH3OCH2OH                 
     &         +XHOCH2OCO+XCH3OCH2O2+XCH3OCH2O2H+XHO2CH2OCHO+XN2                
      XM(36) = +XH+ 2.500*XH2+XCH2+XCH3+XO+XCH4+XOH+12.000*XH2O+XC2H2           
     &         + 1.900*XCO+XC2H4+XC2H5+XCH2O+XC2H6+XO2+XCH3OH+XHO2+XH2O2        
     &         + 3.800*XCO2+XHCOOH+XCH3OCH3+XCH3OCHO+XCH3OCH2OH                 
     &         +XHOCH2OCO+XCH3OCH2O2+XCH3OCH2O2H+XHO2CH2OCHO+XN2                
      XM(37) = +XH+ 2.500*XH2+XCH2+XCH3+XO+XCH4+XOH+12.000*XH2O+XC2H2           
     &         + 1.900*XCO+XC2H4+XC2H5+XCH2O+XC2H6+XO2+XCH3OH+XHO2+XH2O2        
     &         + 3.800*XCO2+XHCOOH+XCH3OCH3+XCH3OCHO+XCH3OCH2OH                 
     &         +XHOCH2OCO+XCH3OCH2O2+XCH3OCH2O2H+XHO2CH2OCHO+XN2                
      XM(48) = +XH+XH2+XCH2+XCH3+XO+XCH4+XOH+ 5.000*XH2O+XC2H2                  
     &         + 2.000*XCO+XC2H4+XC2H5+XCH2O+XC2H6+XO2+XCH3OH+XHO2+XH2O2        
     &         + 3.000*XCO2+XHCOOH+XCH3OCH3+XCH3OCHO+XCH3OCH2OH                 
     &         +XHOCH2OCO+XCH3OCH2O2+XCH3OCH2O2H+XHO2CH2OCHO+XN2                
      XM(49) = +XH+ 2.000*XH2+XCH2+XCH3+XO+ 2.000*XCH4+XOH+ 6.000*XH2O          
     &         +XC2H2+ 1.500*XCO+XC2H4+XC2H5+XCH2O+ 3.000*XC2H6+XO2             
     &         +XCH3OH+XHO2+XH2O2+ 2.000*XCO2+XHCOOH+XCH3OCH3+XCH3OCHO          
     &         +XCH3OCH2OH+XHOCH2OCO+XCH3OCH2O2+XCH3OCH2O2H+XHO2CH2OCHO         
     &         +XN2                                                             
      XM(55) = +XH+XH2+XCH2+XCH3+XO+XCH4+XOH+XH2O+XC2H2+XCO+XC2H4+XC2H5         
     &         +XCH2O+XC2H6+XO2+XCH3OH+XHO2+XH2O2+XCO2+XHCOOH+XCH3OCH3          
     &         +XCH3OCHO+XCH3OCH2OH+XHOCH2OCO+XCH3OCH2O2+XCH3OCH2O2H            
     &         +XHO2CH2OCHO+XN2                                                 
      XM(67) = +XH+XH2+XCH2+XCH3+XO+XCH4+XOH+XH2O+XC2H2+XCO+XC2H4+XC2H5         
     &         +XCH2O+XC2H6+XO2+XCH3OH+XHO2+XH2O2+XCO2+XHCOOH+XCH3OCH3          
     &         +XCH3OCHO+XCH3OCH2OH+XHOCH2OCO+XCH3OCH2O2+XCH3OCH2O2H            
     &         +XHO2CH2OCHO+XN2                                                 
      XM(77) = +XH+ 2.000*XH2+XCH2+XCH3+XO+ 2.000*XCH4+XOH+ 6.000*XH2O          
     &         +XC2H2+ 1.500*XCO+XC2H4+XC2H5+XCH2O+ 3.000*XC2H6+XO2             
     &         +XCH3OH+XHO2+XH2O2+ 2.000*XCO2+XHCOOH+XCH3OCH3+XCH3OCHO          
     &         +XCH3OCH2OH+XHOCH2OCO+XCH3OCH2O2+XCH3OCH2O2H+XHO2CH2OCHO         
     &         +XN2                                                             
      XM(78) = +XH+ 2.000*XH2+XCH2+XCH3+XO+ 2.000*XCH4+XOH+ 6.000*XH2O          
     &         +XC2H2+ 1.500*XCO+XC2H4+XC2H5+XCH2O+ 3.000*XC2H6+XO2             
     &         +XCH3OH+XHO2+XH2O2+ 2.000*XCO2+XHCOOH+XCH3OCH3+XCH3OCHO          
     &         +XCH3OCH2OH+XHOCH2OCO+XCH3OCH2O2+XCH3OCH2O2H+XHO2CH2OCHO         
     &         +XN2                                                             
      XM(79) = +XH+ 2.000*XH2+XCH2+XCH3+XO+ 2.000*XCH4+XOH+ 6.000*XH2O          
     &         +XC2H2+ 1.500*XCO+XC2H4+XC2H5+XCH2O+ 3.000*XC2H6+XO2             
     &         +XCH3OH+XHO2+XH2O2+ 2.000*XCO2+XHCOOH+XCH3OCH3+XCH3OCHO          
     &         +XCH3OCH2OH+XHOCH2OCO+XCH3OCH2O2+XCH3OCH2O2H+XHO2CH2OCHO         
     &         +XN2                                                             
      XM(98) = +XH+ 2.000*XH2+XCH2+XCH3+XO+ 2.000*XCH4+XOH+ 6.000*XH2O          
     &         +XC2H2+ 1.500*XCO+XC2H4+XC2H5+XCH2O+ 3.000*XC2H6+XO2             
     &         +XCH3OH+XHO2+XH2O2+ 2.000*XCO2+XHCOOH+XCH3OCH3+XCH3OCHO          
     &         +XCH3OCH2OH+XHOCH2OCO+XCH3OCH2O2+XCH3OCH2O2H+XHO2CH2OCHO         
     &         +XN2                                                             
      XM(105) = +XH+ 2.000*XH2+XCH2+XCH3+XO+ 2.000*XCH4+XOH+ 6.000*XH2O         
     &          +XC2H2+ 1.500*XCO+XC2H4+XC2H5+XCH2O+ 3.000*XC2H6+XO2            
     &          +XCH3OH+XHO2+XH2O2+ 2.000*XCO2+XHCOOH+XCH3OCH3+XCH3OCHO         
     &          +XCH3OCH2OH+XHOCH2OCO+XCH3OCH2O2+XCH3OCH2O2H+XHO2CH2OCHO        
     &          +XN2                                                            
      XM(112) = +XH+ 2.000*XH2+XCH2+XCH3+XO+ 2.000*XCH4+XOH+ 6.000*XH2O         
     &          +XC2H2+ 1.500*XCO+XC2H4+XC2H5+XCH2O+ 3.000*XC2H6+XO2            
     &          +XCH3OH+XHO2+XH2O2+ 2.000*XCO2+XHCOOH+XCH3OCH3+XCH3OCHO         
     &          +XCH3OCH2OH+XHOCH2OCO+XCH3OCH2O2+XCH3OCH2O2H+XHO2CH2OCHO        
     &          +XN2                                                            
      XM(113) = +XH+ 2.000*XH2+XCH2+XCH3+XO+ 2.000*XCH4+XOH+ 6.000*XH2O         
     &          +XC2H2+ 1.500*XCO+XC2H4+XC2H5+XCH2O+ 3.000*XC2H6+XO2            
     &          +XCH3OH+XHO2+XH2O2+ 2.000*XCO2+XHCOOH+XCH3OCH3+XCH3OCHO         
     &          +XCH3OCH2OH+XHOCH2OCO+XCH3OCH2O2+XCH3OCH2O2H+XHO2CH2OCHO        
     &          +XN2                                                            
      XM(114) = +XH+ 2.000*XH2+XCH2+XCH3+XO+ 2.000*XCH4+XOH+ 6.000*XH2O         
     &          +XC2H2+ 1.500*XCO+XC2H4+XC2H5+XCH2O+ 3.000*XC2H6+XO2            
     &          +XCH3OH+XHO2+XH2O2+ 2.000*XCO2+XHCOOH+XCH3OCH3+XCH3OCHO         
     &          +XCH3OCH2OH+XHOCH2OCO+XCH3OCH2O2+XCH3OCH2O2H+XHO2CH2OCHO        
     &          +XN2                                                            
      XM(130) = +XH+ 2.000*XH2+XCH2+XCH3+XO+ 2.000*XCH4+XOH+ 6.000*XH2O         
     &          +XC2H2+ 1.500*XCO+XC2H4+XC2H5+XCH2O+ 3.000*XC2H6+XO2            
     &          +XCH3OH+XHO2+XH2O2+ 2.000*XCO2+XHCOOH+XCH3OCH3+XCH3OCHO         
     &          +XCH3OCH2OH+XHOCH2OCO+XCH3OCH2O2+XCH3OCH2O2H+XHO2CH2OCHO        
     &          +XN2                                                            
      XM(146) = +XH+ 2.000*XH2+XCH2+XCH3+XO+ 2.000*XCH4+XOH+ 6.000*XH2O         
     &          +XC2H2+ 1.500*XCO+XC2H4+XC2H5+XCH2O+ 3.000*XC2H6+XO2            
     &          +XCH3OH+XHO2+XH2O2+ 2.000*XCO2+XHCOOH+XCH3OCH3+XCH3OCHO         
     &          +XCH3OCH2OH+XHOCH2OCO+XCH3OCH2O2+XCH3OCH2O2H+XHO2CH2OCHO        
     &          +XN2                                                            
      XM(150) = +XH+ 2.000*XH2+XCH2+XCH3+XO+ 2.000*XCH4+XOH+ 6.000*XH2O         
     &          +XC2H2+ 1.500*XCO+XC2H4+XC2H5+XCH2O+ 3.000*XC2H6+XO2            
     &          +XCH3OH+XHO2+XH2O2+ 2.000*XCO2+XHCOOH+XCH3OCH3+XCH3OCHO         
     &          +XCH3OCH2OH+XHOCH2OCO+XCH3OCH2O2+XCH3OCH2O2H+XHO2CH2OCHO        
     &          +XN2                                                            
      XM(156) = +XH+ 2.000*XH2+XCH2+XCH3+XO+ 2.000*XCH4+XOH+ 6.000*XH2O         
     &          +XC2H2+ 1.500*XCO+XC2H4+XC2H5+XCH2O+ 3.000*XC2H6+XO2            
     &          +XCH3OH+XHO2+XH2O2+ 2.000*XCO2+XHCOOH+XCH3OCH3+XCH3OCHO         
     &          +XCH3OCH2OH+XHOCH2OCO+XCH3OCH2O2+XCH3OCH2O2H+XHO2CH2OCHO        
     &          +XN2                                                            
      XM(158) = +XH+XH2+XCH2+XCH3+XO+XCH4+XOH+XC2H2+XC2H4+XC2H5+XCH2O           
     &          +XC2H6+XO2+XCH3OH+XHO2+XH2O2+XHCOOH+XCH3OCH3+XCH3OCHO           
     &          +XCH3OCH2OH+XHOCH2OCO+XCH3OCH2O2+XCH3OCH2O2H+XHO2CH2OCHO        
     &          +XN2                                                            
      XM(170) = +XH+XH2+XCH2+XCH3+XO+XCH4+XOH+XH2O+XC2H2+XCO+XC2H4+XC2H5        
     &          +XCH2O+XC2H6+XO2+XCH3OH+XHO2+XH2O2+XCO2+XHCOOH+XCH3OCH3         
     &          +XCH3OCHO+XCH3OCH2OH+XHOCH2OCO+XCH3OCH2O2+XCH3OCH2O2H           
     &          +XHO2CH2OCHO+XN2                                                
      XM(215) = +XH+XH2+XCH2+XCH3+XO+XCH4+XOH+XH2O+XC2H2+XCO+XC2H4+XC2H5        
     &          +XCH2O+XC2H6+XO2+XCH3OH+XHO2+XH2O2+XCO2+XHCOOH+XCH3OCH3         
     &          +XCH3OCHO+XCH3OCH2OH+XHOCH2OCO+XCH3OCH2O2+XCH3OCH2O2H           
     &          +XHO2CH2OCHO+XN2                                                
      XM(216) = +XH+XH2+XCH2+XCH3+XO+XCH4+XOH+XH2O+XC2H2+XCO+XC2H4+XC2H5        
     &          +XCH2O+XC2H6+XO2+XCH3OH+XHO2+XH2O2+XCO2+XHCOOH+XCH3OCH3         
     &          +XCH3OCHO+XCH3OCH2OH+XHOCH2OCO+XCH3OCH2O2+XCH3OCH2O2H           
     &          +XHO2CH2OCHO+XN2                                                
      XM(229) = +XH+XH2+XCH2+XCH3+XO+XCH4+XOH+XH2O+XC2H2+XCO+XC2H4+XC2H5        
     &          +XCH2O+XC2H6+XO2+XCH3OH+XHO2+XH2O2+XCO2+XHCOOH+XCH3OCH3         
     &          +XCH3OCHO+XCH3OCH2OH+XHOCH2OCO+XCH3OCH2O2+XCH3OCH2O2H           
     &          +XHO2CH2OCHO+XN2                                                
      XM(258) = +XH+XH2+XCH2+XCH3+XO+XCH4+XOH+XH2O+XC2H2+XCO+XC2H4+XC2H5        
     &          +XCH2O+XC2H6+XO2+XCH3OH+XHO2+XH2O2+XCO2+XHCOOH+XCH3OCH3         
     &          +XCH3OCHO+XCH3OCH2OH+XHOCH2OCO+XCH3OCH2O2+XCH3OCH2O2H           
     &          +XHO2CH2OCHO+XN2                                                
      XM(276) = +XH+XH2+XCH2+XCH3+XO+XCH4+XOH+XH2O+XC2H2+XCO+XC2H4+XC2H5        
     &          +XCH2O+XC2H6+XO2+XCH3OH+XHO2+XH2O2+XCO2+XHCOOH+XCH3OCH3         
     &          +XCH3OCHO+XCH3OCH2OH+XHOCH2OCO+XCH3OCH2O2+XCH3OCH2O2H           
     &          +XHO2CH2OCHO+XN2                                                
      XM(277) = +XH+XH2+XCH2+XCH3+XO+XCH4+XOH+XH2O+XC2H2+XCO+XC2H4+XC2H5        
     &          +XCH2O+XC2H6+XO2+XCH3OH+XHO2+XH2O2+XCO2+XHCOOH+XCH3OCH3         
     &          +XCH3OCHO+XCH3OCH2OH+XHOCH2OCO+XCH3OCH2O2+XCH3OCH2O2H           
     &          +XHO2CH2OCHO+XN2                                                

      RETURN
      END

      SUBROUTINE ELEMRATE( RF, RB, T, XM, IREAC, TOLD, P)

!*****double precision
        IMPLICIT DOUBLE PRECISION (A-H, O-Z), INTEGER (I-N)
!*****END double precision
!*****single precision
!       IMPLICIT REAL (A-H, O-Z), INTEGER (I-N)
!*****END single precision

      PARAMETER(ITAB=10000,ITOT=  285)
      PARAMETER(THIGH=3500.,TLOW=250., IOPT=1)
!   ITAB=  total number of grids in the look-up table
!   THIGH= upper limit of temperature [k]
!   TLOW= lower limit of temperature [k]
!   IOPT= 1: Use look-up table
!         2: Direct evalution
      PARAMETER(IRL=  18)

      DIMENSION RF(*), RB(*), XM(*)
      DIMENSION RFTAB(ITOT,ITAB), RBTAB(ITOT,ITAB)
      DIMENSION RLTAB(IRL,ITAB), RL(IRL), LIST(IRL)
      SAVE IFRESH, DT, RFTAB, RBTAB, RLTAB, LIST, TOL
      DATA LIST/   9,  16,  22,  48,  49,  77,  78,  79,  98, 105, 112,         
     &      113, 114, 130, 146, 150, 156, 170/                                  
      DATA IFRESH/0/, SMALL/1.D-50/

!   IFRESH=0 BUILD A TABLE IF IOPT=1 
      IF(IFRESH .EQ. 0 ) THEN
        IF(IOPT .EQ. 1 ) THEN
          DT=(THIGH-TLOW)/REAL(ITAB-1)
          DO I=1, ITAB
           TIN=TLOW+ REAL(I-1)* DT
           CALL RATE( RFtab(1,I), RBtab(1, I), TIN, 1)
           CALL RATEL( RLtab(1,I), TIN)
          END DO
        END IF
         TOL =1.0 
  10  CONTINUE
         TOL = TOL * 0.5
          COMP =1.0 + TOL
          IF(COMP .NE. 1.0) GOTO 10
         IFRESH =1 
      END IF

      IF(IOPT .EQ. 1 .AND. T .GE. TLOW .AND. T .LT. THIGH) THEN 
!   LINEAR INTERPOLATION  
        INDX= INT( (T-TLOW)/DT ) + 1
        INDXP=INDX+1
        FP=(T-TLOW)/DT -REAL(INDX-1)
        FM=1.-FP
       IF( ABS(T-TOLD) .GT. TOL) THEN
        DO I=1,IREAC
          RF(I)= RFTAB(I,INDX)*FM+ RFTAB(I,INDXP)*FP
          RB(I)= RBTAB(I,INDX)*FM+ RBTAB(I,INDXP)*FP
        END DO

        DO I=1, IRL
           RL(I)= RLTAB(I,INDX)*FM+ RLTAB(I,INDXP)*FP
         END DO
       ELSE
         DO J=1, IRL
           I=LIST(J)
           RF(I)= RFTAB(I,INDX)*FM+ RFTAB(I,INDXP)*FP
           RB(I)= RBTAB(I,INDX)*FM+ RBTAB(I,INDXP)*FP
         END DO
        END IF
      ELSE

!   DIRECT COMPUTATION
       IF( ABS(T-TOLD) .GT. TOL) THEN
         CALL RATE( RF, RB, T, 1)
         CALL RATEL( RL, T)
       ELSE
         CALL RATE( RF, RB, T, 2)
       END IF
      END IF
       TOLD=T
! FALL-OFF RATES
 
!  /* fall off rate for reaction =9  */                                         
      PR = RL(1)*XM(9)/RF(9)                                                    
      PRLOG = DLOG10(MAX(PR,SMALL))
      F4= 8.D-01              
      F5= 1.D-30              
      F6= 1.D+30              
      FC = (1.0D0-F4)*EXP(-T/F5)+F4*EXP(-T/F6)
      FCLOG = DLOG10(MAX(FC,SMALL))
      CPRLOG = PRLOG - (0.4D0 + 0.67D0*FCLOG)
      X = CPRLOG/(0.75D0-1.27D0*FCLOG-0.14D0*CPRLOG)
      F = 10.0D0**( FCLOG/(1.0D0+X*X) )
      PCOR = PR*F/(1.0D0+PR)
      RF(9) = RF(9)*PCOR                                                        
      RB(9) = RB(9)*PCOR                                                        
!  /* fall off rate for reaction =16  */                                        
      PR = RL(2)*XM(16)/RF(16)                                                  
      PRLOG = DLOG10(MAX(PR,SMALL))
      F4= 5.D-01              
      F5= 1.D-30              
      F6= 1.D+30              
      FC = (1.0D0-F4)*EXP(-T/F5)+F4*EXP(-T/F6)
      FCLOG = DLOG10(MAX(FC,SMALL))
      CPRLOG = PRLOG - (0.4D0 + 0.67D0*FCLOG)
      X = CPRLOG/(0.75D0-1.27D0*FCLOG-0.14D0*CPRLOG)
      F = 10.0D0**( FCLOG/(1.0D0+X*X) )
      PCOR = PR*F/(1.0D0+PR)
      RF(16) = RF(16)*PCOR                                                      
      RB(16) = RB(16)*PCOR                                                      
!  /* fall off rate for reaction =22  */                                        
      PR = RL(3)*XM(22)/RF(22)                                                  
      PCOR = PR/(1.0D0+PR)
      RF(22) = RF(22)*PCOR                                                      
      RB(22) = RB(22)*PCOR                                                      
!  /* fall off rate for reaction =48  */                                        
      PR = RL(4)*XM(48)/RF(48)                                                  
      PRLOG = DLOG10(MAX(PR,SMALL))
      F4=  0.D0               
      F5= 5.7D+02             
      F6=  0.D0               
      F7= 1.D+30              
      FC = (1.0D0-F4)*EXP(-T/F5)+F4*EXP(-T/F6)+EXP(-F7/T)
      FCLOG = DLOG10(MAX(FC,SMALL))
      CPRLOG = PRLOG - (0.4D0 + 0.67D0*FCLOG)
      X = CPRLOG/(0.75D0-1.27D0*FCLOG-0.14D0*CPRLOG)
      F = 10.0D0**( FCLOG/(1.0D0+X*X) )
      PCOR = PR*F/(1.0D0+PR)
      RF(48) = RF(48)*PCOR                                                      
      RB(48) = RB(48)*PCOR                                                      
!  /* fall off rate for reaction =49  */                                        
      PR = RL(5)*XM(49)/RF(49)                                                  
      PRLOG = DLOG10(MAX(PR,SMALL))
      F4= 7.83D-01            
      F5= 7.4D+01             
      F6= 2.941D+03           
      F7= 6.964D+03           
      FC = (1.0D0-F4)*EXP(-T/F5)+F4*EXP(-T/F6)+EXP(-F7/T)
      FCLOG = DLOG10(MAX(FC,SMALL))
      CPRLOG = PRLOG - (0.4D0 + 0.67D0*FCLOG)
      X = CPRLOG/(0.75D0-1.27D0*FCLOG-0.14D0*CPRLOG)
      F = 10.0D0**( FCLOG/(1.0D0+X*X) )
      PCOR = PR*F/(1.0D0+PR)
      RF(49) = RF(49)*PCOR                                                      
      RB(49) = RB(49)*PCOR                                                      
!  /* fall off rate for reaction =77  */                                        
      PR = RL(6)*XM(77)/RF(77)                                                  
      PRLOG = DLOG10(MAX(PR,SMALL))
      F4= 4.12D-01            
      F5= 1.95D+02            
      F6= 5.9D+03             
      F7= 6.394D+03           
      FC = (1.0D0-F4)*EXP(-T/F5)+F4*EXP(-T/F6)+EXP(-F7/T)
      FCLOG = DLOG10(MAX(FC,SMALL))
      CPRLOG = PRLOG - (0.4D0 + 0.67D0*FCLOG)
      X = CPRLOG/(0.75D0-1.27D0*FCLOG-0.14D0*CPRLOG)
      F = 10.0D0**( FCLOG/(1.0D0+X*X) )
      PCOR = PR*F/(1.0D0+PR)
      RF(77) = RF(77)*PCOR                                                      
      RB(77) = RB(77)*PCOR                                                      
!  /* fall off rate for reaction =78  */                                        
      PR = RL(7)*XM(78)/RF(78)                                                  
      PRLOG = DLOG10(MAX(PR,SMALL))
      F4= 6.D-01              
      F5= 1.D+02              
      F6= 9.D+04              
      F7= 1.D+04              
      FC = (1.0D0-F4)*EXP(-T/F5)+F4*EXP(-T/F6)+EXP(-F7/T)
      FCLOG = DLOG10(MAX(FC,SMALL))
      CPRLOG = PRLOG - (0.4D0 + 0.67D0*FCLOG)
      X = CPRLOG/(0.75D0-1.27D0*FCLOG-0.14D0*CPRLOG)
      F = 10.0D0**( FCLOG/(1.0D0+X*X) )
      PCOR = PR*F/(1.0D0+PR)
      RF(78) = RF(78)*PCOR                                                      
      RB(78) = RB(78)*PCOR                                                      
!  /* fall off rate for reaction =79  */                                        
      PR = RL(8)*XM(79)/RF(79)                                                  
      PRLOG = DLOG10(MAX(PR,SMALL))
      F4= 7.D-01              
      F5= 1.D+02              
      F6= 9.D+04              
      F7= 1.D+04              
      FC = (1.0D0-F4)*EXP(-T/F5)+F4*EXP(-T/F6)+EXP(-F7/T)
      FCLOG = DLOG10(MAX(FC,SMALL))
      CPRLOG = PRLOG - (0.4D0 + 0.67D0*FCLOG)
      X = CPRLOG/(0.75D0-1.27D0*FCLOG-0.14D0*CPRLOG)
      F = 10.0D0**( FCLOG/(1.0D0+X*X) )
      PCOR = PR*F/(1.0D0+PR)
      RF(79) = RF(79)*PCOR                                                      
      RB(79) = RB(79)*PCOR                                                      
!  /* fall off rate for reaction =98  */                                        
      PR = RL(9)*XM(98)/RF(98)                                                  
      PRLOG = DLOG10(MAX(PR,SMALL))
      F4= 6.027D-01           
      F5= 2.08D+02            
      F6= 3.922D+03           
      F7= 1.018D+04           
      FC = (1.0D0-F4)*EXP(-T/F5)+F4*EXP(-T/F6)+EXP(-F7/T)
      FCLOG = DLOG10(MAX(FC,SMALL))
      CPRLOG = PRLOG - (0.4D0 + 0.67D0*FCLOG)
      X = CPRLOG/(0.75D0-1.27D0*FCLOG-0.14D0*CPRLOG)
      F = 10.0D0**( FCLOG/(1.0D0+X*X) )
      PCOR = PR*F/(1.0D0+PR)
      RF(98) = RF(98)*PCOR                                                      
      RB(98) = RB(98)*PCOR                                                      
!  /* fall off rate for reaction =105  */                                       
      PR = RL(10)*XM(105)/RF(105)                                               
      PRLOG = DLOG10(MAX(PR,SMALL))
      F4= 8.422D-01           
      F5= 1.25D+02            
      F6= 2.219D+03           
      F7= 6.882D+03           
      FC = (1.0D0-F4)*EXP(-T/F5)+F4*EXP(-T/F6)+EXP(-F7/T)
      FCLOG = DLOG10(MAX(FC,SMALL))
      CPRLOG = PRLOG - (0.4D0 + 0.67D0*FCLOG)
      X = CPRLOG/(0.75D0-1.27D0*FCLOG-0.14D0*CPRLOG)
      F = 10.0D0**( FCLOG/(1.0D0+X*X) )
      PCOR = PR*F/(1.0D0+PR)
      RF(105) = RF(105)*PCOR                                                    
      RB(105) = RB(105)*PCOR                                                    
!  /* fall off rate for reaction =112  */                                       
      PR = RL(11)*XM(112)/RF(112)                                               
      PRLOG = DLOG10(MAX(PR,SMALL))
      F4= 7.345D-01           
      F5= 1.8D+02             
      F6= 1.035D+03           
      F7= 5.417D+03           
      FC = (1.0D0-F4)*EXP(-T/F5)+F4*EXP(-T/F6)+EXP(-F7/T)
      FCLOG = DLOG10(MAX(FC,SMALL))
      CPRLOG = PRLOG - (0.4D0 + 0.67D0*FCLOG)
      X = CPRLOG/(0.75D0-1.27D0*FCLOG-0.14D0*CPRLOG)
      F = 10.0D0**( FCLOG/(1.0D0+X*X) )
      PCOR = PR*F/(1.0D0+PR)
      RF(112) = RF(112)*PCOR                                                    
      RB(112) = RB(112)*PCOR                                                    
!  /* fall off rate for reaction =113  */                                       
      PR = RL(12)*XM(113)/RF(113)                                               
      PRLOG = DLOG10(MAX(PR,SMALL))
      F4= 9.753D-01           
      F5= 2.1D+02             
      F6= 9.84D+02            
      F7= 4.374D+03           
      FC = (1.0D0-F4)*EXP(-T/F5)+F4*EXP(-T/F6)+EXP(-F7/T)
      FCLOG = DLOG10(MAX(FC,SMALL))
      CPRLOG = PRLOG - (0.4D0 + 0.67D0*FCLOG)
      X = CPRLOG/(0.75D0-1.27D0*FCLOG-0.14D0*CPRLOG)
      F = 10.0D0**( FCLOG/(1.0D0+X*X) )
      PCOR = PR*F/(1.0D0+PR)
      RF(113) = RF(113)*PCOR                                                    
      RB(113) = RB(113)*PCOR                                                    
!  /* fall off rate for reaction =114  */                                       
      PR = RL(13)*XM(114)/RF(114)                                               
      PRLOG = DLOG10(MAX(PR,SMALL))
      F4= 7.82D-01            
      F5= 2.075D+02           
      F6= 2.663D+03           
      F7= 6.095D+03           
      FC = (1.0D0-F4)*EXP(-T/F5)+F4*EXP(-T/F6)+EXP(-F7/T)
      FCLOG = DLOG10(MAX(FC,SMALL))
      CPRLOG = PRLOG - (0.4D0 + 0.67D0*FCLOG)
      X = CPRLOG/(0.75D0-1.27D0*FCLOG-0.14D0*CPRLOG)
      F = 10.0D0**( FCLOG/(1.0D0+X*X) )
      PCOR = PR*F/(1.0D0+PR)
      RF(114) = RF(114)*PCOR                                                    
      RB(114) = RB(114)*PCOR                                                    
!  /* fall off rate for reaction =130  */                                       
      PR = RL(14)*XM(130)/RF(130)                                               
      PRLOG = DLOG10(MAX(PR,SMALL))
      F4= 7.507D-01           
      F5= 9.85D+01            
      F6= 1.302D+03           
      F7= 4.167D+03           
      FC = (1.0D0-F4)*EXP(-T/F5)+F4*EXP(-T/F6)+EXP(-F7/T)
      FCLOG = DLOG10(MAX(FC,SMALL))
      CPRLOG = PRLOG - (0.4D0 + 0.67D0*FCLOG)
      X = CPRLOG/(0.75D0-1.27D0*FCLOG-0.14D0*CPRLOG)
      F = 10.0D0**( FCLOG/(1.0D0+X*X) )
      PCOR = PR*F/(1.0D0+PR)
      RF(130) = RF(130)*PCOR                                                    
      RB(130) = RB(130)*PCOR                                                    
!  /* fall off rate for reaction =146  */                                       
      PR = RL(15)*XM(146)/RF(146)                                               
      PRLOG = DLOG10(MAX(PR,SMALL))
      F4= 6.464D-01           
      F5= 1.32D+02            
      F6= 1.315D+03           
      F7= 5.566D+03           
      FC = (1.0D0-F4)*EXP(-T/F5)+F4*EXP(-T/F6)+EXP(-F7/T)
      FCLOG = DLOG10(MAX(FC,SMALL))
      CPRLOG = PRLOG - (0.4D0 + 0.67D0*FCLOG)
      X = CPRLOG/(0.75D0-1.27D0*FCLOG-0.14D0*CPRLOG)
      F = 10.0D0**( FCLOG/(1.0D0+X*X) )
      PCOR = PR*F/(1.0D0+PR)
      RF(146) = RF(146)*PCOR                                                    
      RB(146) = RB(146)*PCOR                                                    
!  /* fall off rate for reaction =150  */                                       
      PR = RL(16)*XM(150)/RF(150)                                               
      PRLOG = DLOG10(MAX(PR,SMALL))
      F4= 6.8D-01             
      F5= 7.8D+01             
      F6= 1.995D+03           
      F7= 5.59D+03            
      FC = (1.0D0-F4)*EXP(-T/F5)+F4*EXP(-T/F6)+EXP(-F7/T)
      FCLOG = DLOG10(MAX(FC,SMALL))
      CPRLOG = PRLOG - (0.4D0 + 0.67D0*FCLOG)
      X = CPRLOG/(0.75D0-1.27D0*FCLOG-0.14D0*CPRLOG)
      F = 10.0D0**( FCLOG/(1.0D0+X*X) )
      PCOR = PR*F/(1.0D0+PR)
      RF(150) = RF(150)*PCOR                                                    
      RB(150) = RB(150)*PCOR                                                    
!  /* fall off rate for reaction =156  */                                       
      PR = RL(17)*XM(156)/RF(156)                                               
      PRLOG = DLOG10(MAX(PR,SMALL))
      F4= 5.907D-01           
      F5= 2.75D+02            
      F6= 1.226D+03           
      F7= 5.185D+03           
      FC = (1.0D0-F4)*EXP(-T/F5)+F4*EXP(-T/F6)+EXP(-F7/T)
      FCLOG = DLOG10(MAX(FC,SMALL))
      CPRLOG = PRLOG - (0.4D0 + 0.67D0*FCLOG)
      X = CPRLOG/(0.75D0-1.27D0*FCLOG-0.14D0*CPRLOG)
      F = 10.0D0**( FCLOG/(1.0D0+X*X) )
      PCOR = PR*F/(1.0D0+PR)
      RF(156) = RF(156)*PCOR                                                    
      RB(156) = RB(156)*PCOR                                                    
!  /* fall off rate for reaction =170  */                                       
      PR = RL(18)*XM(170)/RF(170)                                               
      PCOR = PR/(1.0D0+PR)
      RF(170) = RF(170)*PCOR                                                    
      RB(170) = RB(170)*PCOR                                                    

      RETURN
      END

      SUBROUTINE RATE( RF, RB, T, IFALL  )

!*****double precision
        IMPLICIT DOUBLE PRECISION (A-H, O-Z), INTEGER (I-N)
!*****END double precision
!*****single precision
!       IMPLICIT REAL (A-H, O-Z), INTEGER (I-N)
!*****END single precision

      DIMENSION RF(*), RB(*)


! RATE CONSTANTS FOR SKELETAL MECHANSIM
! FOR FALL_OFF ONLY HIGH PRESS LIMITS ARE COMPUTED

      RUC = 1.987215583D0
      ALOGT = DLOG(T)
      RTR = 1.0D3/(RUC*T)
      TM1 = 1.0/T                                                               
      TM2 = 1.0/T/T                                                             
      TM3 = 1.0/T/T/T                                                           
      TP1 = T                                                                   
      TP2 = T*T                                                                 
      TP3 = T*T*T                                                               
 
      IF(IFALL .EQ. 1) THEN
      RF(1) =3.547D+15 * EXP(-0.406*ALOGT-1.6599D+01*RTR)                       
      RB(1) = EXP(-8.633045D+05*TM3-3.913004D+04*TM2+2.957789D+02*TM1           
     &        +2.951283D+01+1.974528D-04*TP1-5.356664D-08*TP2                   
     &        +5.093303D-12*TP3)                                                
      RF(2) =5.08D+04 * EXP( 2.67*ALOGT-6.29*RTR)                               
      RB(2) = EXP(-4.1268D+07*TM3+4.417227D+05*TM2-4.717777D+03*TM1             
     &        +2.901753D+01+1.534422D-03*TP1-2.165931D-07*TP2                   
     &        +1.573317D-11*TP3)                                                
      RF(3) =2.16D+08 * EXP( 1.51*ALOGT-3.43*RTR)                               
      RB(3) = EXP(-3.523994D+07*TM3+3.853236D+05*TM2-1.089893D+04*TM1           
     &        +3.203511D+01+6.417346D-04*TP1-9.579842D-08*TP2                   
     &        +7.433645D-12*TP3)                                                
      RF(4) =2.97D+06 * EXP( 2.02*ALOGT-1.34D+01*RTR)                           
      RB(4) = EXP(-1.807851D+07*TM3+1.871326D+05*TM2+1.823237D+02*TM1           
     &        +2.630572D+01+1.415143D-03*TP1-1.953746D-07*TP2                   
     &        +1.359026D-11*TP3)                                                
      RF(5) =4.577D+19 * EXP( -1.4*ALOGT-1.0438D+02*RTR)                        
      RB(5) = EXP(+3.052274D+07*TM3-3.177137D+05*TM2+1.067689D+03*TM1           
     &        +3.440906D+01-1.183187D-03*TP1+2.14632D-07*TP2                    
     &        -1.643139D-11*TP3)                                                
      RF(6) =6.165D+15 * EXP(-0.5*ALOGT)                                        
      RB(6) = EXP(-1.202995D+06*TM3+4.213701D+04*TM2-5.977377D+04*TM1           
     &        +3.660559D+01-5.027937D-04*TP1+5.386451D-08*TP2                   
     &        -3.541176D-12*TP3)                                                
      RF(7) =4.714D+18 * EXP( -1.*ALOGT)                                        
      RB(7) = EXP(-7.491573D+05*TM3-1.12825D+04*TM2-5.104914D+04*TM1            
     &        +3.629012D+01-3.624464D-04*TP1+8.44963D-09*TP2                    
     &        +9.738383D-13*TP3)                                                
      RF(8) =3.8D+22 * EXP( -2.*ALOGT)                                          
      RB(8) = EXP(+3.036962D+06*TM3-4.335917D+04*TM2-5.879878D+04*TM1           
     &        +4.107557D+01-1.157933D-03*TP1+1.15369D-07*TP2                    
     &        -6.341363D-12*TP3)                                                
      RF(10) =1.66D+13 * EXP(-8.23D-01*RTR)                                     
      RB(10) = EXP(-6.61839D+05*TM3-2.64822D+04*TM2-2.792198D+04*TM1            
     &         +3.090543D+01+3.270804D-04*TP1-3.92316D-08*TP2                   
     &         +1.981813D-12*TP3)                                               
      RF(11) =7.079D+13 * EXP(-2.95D-01*RTR)                                    
      RB(11) = EXP(-1.106964D+07*TM3+3.194726D+04*TM2-1.873071D+04*TM1          
     &         +2.82815D+01+6.83562D-04*TP1-1.130553D-07*TP2                    
     &         +8.880123D-12*TP3)                                               
      RF(12) =3.25D+13                                                          
      RB(12) = EXP(-4.517408D+06*TM3+9.358975D+03*TM2-2.690286D+04*TM1          
     &         +3.093226D+01+2.394617D-04*TP1-2.428003D-08*TP2                  
     &         +1.289101D-12*TP3)                                               
      RF(13) =2.89D+13 * EXP(+4.97D-01*RTR)                                     
      RB(13) = EXP(-1.474343D+07*TM3+1.292979D+05*TM2-3.521046D+04*TM1          
     &         +3.365677D+01+5.148086D-05*TP1-4.08154D-09*TP2                   
     &         +1.259154D-13*TP3)                                               
      RF(14) =4.2D+14 * EXP(-1.1982D+01*RTR)                                    
      RB(14) = EXP(-1.80453D+05*TM3-1.254855D+04*TM2-2.536682D+04*TM1           
     &         +3.620495D+01-4.366881D-04*TP1+9.768279D-08*TP2                  
     &         -7.553797D-12*TP3)                                               
      RF(15) =1.3D+11 * EXP(+1.6293*RTR)                                        
      RB(15) = EXP(-1.804531D+05*TM3-1.254855D+04*TM2-1.851739D+04*TM1          
     &         +2.812448D+01-4.366881D-04*TP1+9.768279D-08*TP2                  
     &         -7.553797D-12*TP3)                                               
      RF(17) =2.41D+13 * EXP(-3.97*RTR)                                         
      RB(17) = EXP(-2.563263D+07*TM3+1.737937D+05*TM2-3.670331D+04*TM1          
     &         +2.733223D+01+1.171731D-03*TP1-2.148197D-07*TP2                  
     &         +1.655984D-11*TP3)                                               
      RF(18) =4.82D+13 * EXP(-7.95*RTR)                                         
      RB(18) = EXP(-4.813859D+05*TM3-1.393364D+04*TM2-1.217112D+04*TM1          
     &         +2.943771D+01+7.637685D-04*TP1-1.369144D-07*TP2                  
     &         +9.53561D-12*TP3)                                                
      RF(19) =9.55D+06 * EXP( 2.*ALOGT-3.97*RTR)                                
      RB(19) = EXP(-3.236125D+07*TM3+3.259387D+05*TM2-1.117946D+04*TM1          
     &         +2.74609D+01+1.891162D-03*TP1-2.954045D-07*TP2                   
     &         +2.114693D-11*TP3)                                               
      RF(20) =1.D+12                                                            
      RB(20) = EXP(-1.456298D+07*TM3+1.418464D+05*TM2-1.612328D+04*TM1          
     &         +2.775926D+01+4.88169D-04*TP1-1.017643D-07*TP2                   
     &         +7.679712D-12*TP3)                                               
      RF(21) =5.8D+14 * EXP(-9.557*RTR)                                         
      RB(21) = EXP(-1.456298D+07*TM3+1.418464D+05*TM2-2.093252D+04*TM1          
     &         +3.412228D+01+4.88169D-04*TP1-1.017643D-07*TP2                   
     &         +7.679712D-12*TP3)                                               
      RF(23) =2.53D+12 * EXP(-4.77D+01*RTR)                                     
      RB(23) = EXP(+1.335278D+07*TM3-9.846158D+04*TM2-2.789316D+04*TM1          
     &         +3.210364D+01-6.0904D-04*TP1+9.185343D-08*TP2                    
     &         -6.203694D-12*TP3)                                               
      RF(24) =3.01D+13 * EXP(-2.3D+01*RTR)                                      
      RB(24) = EXP(+8.835375D+06*TM3-8.91026D+04*TM2-4.236657D+04*TM1           
     &         +3.439994D+01-3.695783D-04*TP1+6.757341D-08*TP2                  
     &         -4.914593D-12*TP3)                                               
      RF(25) =2.229D+05 * EXP( 1.89*ALOGT+1.1587*RTR)                           
      RB(25) = EXP(-6.577938D+06*TM3+1.662596D+05*TM2-1.315448D+04*TM1          
     &         +3.261501D+01+9.50461D-05*TP1+1.672633D-08*TP2                   
     &         -2.167407D-12*TP3)                                               
      RF(26) =4.7485D+11 * EXP( 0.659*ALOGT-1.4874D+01*RTR)                     
      RB(26) = EXP(+6.317674D+06*TM3-8.976427D+04*TM2+1.616556D+02*TM1          
     &         +3.089005D+01+7.911087D-04*TP1-9.608402D-08*TP2                  
     &         +6.159275D-12*TP3)                                               
      RF(27) =7.58D+12 * EXP(-4.1D-01*RTR)                                      
      RB(27) = EXP(+5.307782D+06*TM3-5.856843D+04*TM2-1.698165D+04*TM1          
     &         +2.953786D+01+3.963601D-04*TP1-9.292617D-08*TP2                  
     &         +7.94185D-12*TP3)                                                
      RF(28) =7.23D+13                                                          
      RB(28) = EXP(+4.645943D+06*TM3-8.505063D+04*TM2-4.428315D+04*TM1          
     &         +3.225817D+01+7.234405D-04*TP1-1.321578D-07*TP2                  
     &         +9.923663D-12*TP3)                                               
      RF(29) =3.02D+13                                                          
      RB(29) = EXP(+7.903744D+05*TM3-4.920946D+04*TM2-4.367819D+04*TM1          
     &         +3.074018D+01+6.358218D-04*TP1-1.172062D-07*TP2                  
     &         +9.230951D-12*TP3)                                               
      RF(30) =3.02D+13                                                          
      RB(30) = EXP(-9.435653D+06*TM3+7.072944D+04*TM2-5.223589D+04*TM1          
     &         +3.35821D+01+4.47841D-04*TP1-9.700771D-08*TP2                    
     &         +8.067765D-12*TP3)                                               
      RF(31) =3.D+13                                                            
      RB(31) = EXP(+2.069539D+07*TM3-1.702593D+05*TM2-5.588851D+04*TM1          
     &         +3.770717D+01-4.173185D-04*TP1+6.342254D-08*TP2                  
     &         -4.563765D-12*TP3)                                               
      RF(32) =3.D+13                                                            
      RB(32) = EXP(+2.438705D+07*TM3-2.790451D+05*TM2-2.261358D+04*TM1          
     &         +3.375361D+01+2.118387D-05*TP1+2.863843D-08*TP2                  
     &         -2.809495D-12*TP3)                                               
      RF(33) =3.D+12                                                            
      RB(33) = EXP(+2.019762D+07*TM3-2.749932D+05*TM2-3.610414D+04*TM1          
     &         +2.843296D+01+1.114203D-03*TP1-1.710928D-07*TP2                  
     &         +1.202876D-11*TP3)                                               
      RF(34) =2.65D+13                                                          
      RB(34) = EXP(-3.507914D+07*TM3+3.50151D+05*TM2-4.639136D+04*TM1           
     &         +3.659753D+01-1.586689D-04*TP1+7.688D-09*TP2                     
     &         +2.854051D-13*TP3)                                               
      RF(35) =3.D+13                                                            
      RB(35) = EXP(-1.623709D+07*TM3+1.695115D+05*TM2-3.831221D+04*TM1          
     &         +3.570864D+01-5.349171D-05*TP1-1.124117D-08*TP2                  
     &         +1.722812D-12*TP3)                                               
      RF(36) =3.3D+39 * EXP( -6.3*ALOGT-9.99D+01*RTR)                           
      RB(36) = EXP(+1.200653D+08*TM3-1.317152D+06*TM2+1.310635D+03*TM1          
     &         +4.125234D+01-3.383034D-03*TP1+5.186476D-07*TP2                  
     &         -3.837541D-11*TP3)                                               
      RF(37) =3.1D+45 * EXP( -8.*ALOGT-9.751D+01*RTR)                           
      RB(37) = EXP(+1.485319D+08*TM3-1.660629D+06*TM2-4.039613D+04*TM1          
     &         +4.33645D+01-3.692354D-03*TP1+5.339152D-07*TP2                   
     &         -3.891017D-11*TP3)                                               
      RF(38) =5.74D+07 * EXP( 1.9*ALOGT-2.7486*RTR)                             
      RB(38) = EXP(-5.740048D+06*TM3+3.426747D+04*TM2-8.889395D+03*TM1          
     &         +2.693287D+01+1.931194D-03*TP1-2.856862D-07*TP2                  
     &         +1.988968D-11*TP3)                                               
      RF(39) =1.81D+13 * EXP(-3.08*RTR)                                         
      RB(39) = EXP(+1.702746D+07*TM3-2.18721D+05*TM2-6.915884D+03*TM1           
     &         +2.555183D+01+6.893136D-04*TP1-1.05965D-07*TP2                   
     &         +7.508139D-12*TP3)                                               
      RF(40) =3.43D+09 * EXP( 1.18*ALOGT+4.47D-01*RTR)                          
      RB(40) = EXP(-9.732899D+06*TM3+8.059633D+04*TM2-1.465225D+04*TM1          
     &         +2.814314D+01+1.21819D-03*TP1-1.880971D-07*TP2                   
     &         +1.360433D-11*TP3)                                               
      RF(41) =1.23D+06 * EXP( 3.*ALOGT-5.2D+01*RTR)                             
      RB(41) = EXP(-2.049157D+07*TM3+2.279668D+05*TM2-7.054556D+03*TM1          
     &         +3.038123D+01+2.27237D-03*TP1-3.418476D-07*TP2                   
     &         +2.467508D-11*TP3)                                               
      RF(42) =4.11D+04 * EXP( 2.5*ALOGT-1.021D+01*RTR)                          
      RB(42) = EXP(-1.366595D+07*TM3+1.394105D+05*TM2-4.958383D+03*TM1          
     &         +2.599051D+01+1.531929D-03*TP1-2.008043D-07*TP2                  
     &         +1.404528D-11*TP3)                                               
      RF(43) =3.636D-06 * EXP( 5.42*ALOGT-9.98D-01*RTR)                         
      RB(43) = EXP(-9.478789D+07*TM3+1.004564D+06*TM2-1.296103D+04*TM1          
     &         +2.670619D+01+3.187506D-03*TP1-4.510978D-07*TP2                  
     &         +3.190652D-11*TP3)                                               
      RF(44) =8.43D+13                                                          
      RB(44) = EXP(-8.427387D+06*TM3+1.251592D+05*TM2-3.59344D+04*TM1           
     &         +3.571024D+01-5.947048D-04*TP1+1.291346D-07*TP2                  
     &         -1.087074D-11*TP3)                                               
      RF(45) =1.99D+18 * EXP( -1.57*ALOGT-2.923D+01*RTR)                        
      RB(45) = EXP(+1.264033D+07*TM3-7.790462D+04*TM2+4.06457D+01*TM1           
     &         +3.366928D+01-1.629069D-03*TP1+2.390607D-07*TP2                  
     &         -1.65609D-11*TP3)                                                
      RF(46) =3.74D+11 * EXP(-1.464D+01*RTR)                                    
      RB(46) = EXP(-1.497962D+07*TM3+1.477475D+05*TM2-3.498089D+04*TM1          
     &         +2.686312D+01-1.506044D-04*TP1+4.035927D-08*TP2                  
     &         -3.27972D-12*TP3)                                                
      RF(47) =2.41D+10 * EXP( 0.76*ALOGT+2.325*RTR)                             
      RB(47) = EXP(-2.452538D+07*TM3+2.856506D+05*TM2-1.286598D+04*TM1          
     &         +3.168954D+01+2.588205D-05*TP1+1.272114D-08*TP2                  
     &         -9.376061D-13*TP3)                                               
      RF(50) =5.47D+07 * EXP( 1.97*ALOGT-1.121D+01*RTR)                         
      RB(50) = EXP(+1.212116D+07*TM3-1.35731D+05*TM2-5.124724D+03*TM1           
     &         +2.636533D+01+2.078896D-03*TP1-3.106859D-07*TP2                  
     &         +2.175773D-11*TP3)                                               
      RF(51) =3.15D+12 * EXP( 0.5*ALOGT-1.029D+01*RTR)                          
      RB(51) = EXP(+2.886345D+07*TM3-3.233527D+05*TM2-2.868951D+03*TM1          
     &         +2.631601D+01+1.098244D-03*TP1-1.682546D-07*TP2                  
     &         +1.202155D-11*TP3)                                               
      RF(52) =5.72D+06 * EXP( 1.96*ALOGT-2.639*RTR)                             
      RB(52) = EXP(-1.820316D+06*TM3+1.852896D+04*TM2-8.756307D+03*TM1          
     &         +2.623383D+01+1.797222D-03*TP1-2.746686D-07*TP2                  
     &         +1.984031D-11*TP3)                                               
      RF(53) =3.16D+12                                                          
      RB(53) = EXP(-4.038693D+07*TM3+4.087194D+05*TM2-2.961604D+04*TM1          
     &         +3.458964D+01-5.55029D-04*TP1+1.006142D-07*TP2                   
     &         -7.656444D-12*TP3)                                               
      RF(54) =1.81D+11 * EXP(-1.858D+01*RTR)                                    
      RB(54) = EXP(+4.020647D+07*TM3-4.21268D+05*TM2+9.289898D+02*TM1           
     &         +2.264739D+01+1.183409D-04*TP1-2.931388D-09*TP2                  
     &         +1.026475D-13*TP3)                                               
      RF(55) =1.D+14 * EXP(-2.51D+01*RTR)                                       
      RB(55) = EXP(-1.830864D+07*TM3+1.564836D+05*TM2+1.043366D+03*TM1          
     &         +3.301236D+01-8.737562D-06*TP1+2.715626D-08*TP2                  
     &         -2.888391D-12*TP3)                                               
      RF(56) =6.D+12                                                            
      RB(56) = EXP(-2.921438D+07*TM3+2.613755D+05*TM2-3.878806D+04*TM1          
     &         +3.118828D+01+3.239408D-04*TP1-6.606654D-08*TP2                  
     &         +4.930174D-12*TP3)                                               
      RF(57) =9.635D+13                                                         
      RB(57) = EXP(-2.464256D+07*TM3+1.720574D+05*TM2-2.248695D+03*TM1          
     &         +2.967466D+01+8.310268D-04*TP1-1.802495D-07*TP2                  
     &         +1.51082D-11*TP3)                                                
      RF(58) =4.2D+13                                                           
      RB(58) = EXP(-3.306995D+07*TM3+2.972166D+05*TM2-3.818309D+04*TM1          
     &         +3.248918D+01+2.363221D-04*TP1-5.111496D-08*TP2                  
     &         +4.237462D-12*TP3)                                               
      RF(59) =2.4D+13                                                           
      RB(59) = EXP(-4.329597D+07*TM3+4.171555D+05*TM2-4.674079D+04*TM1          
     &         +3.477148D+01+4.834122D-05*TP1-3.091648D-08*TP2                  
     &         +3.074276D-12*TP3)                                               
      RF(60) =2.41D+14 * EXP(-5.017*RTR)                                        
      RB(60) = EXP(-2.855254D+07*TM3+2.878577D+05*TM2-1.380487D+04*TM1          
     &         +3.441631D+01-3.139633D-06*TP1-2.683494D-08*TP2                  
     &         +2.948361D-12*TP3)                                               
      RF(61) =1.51D+15 * EXP( -1.*ALOGT)                                        
      RB(61) = EXP(-1.454039D+07*TM3+1.358421D+05*TM2-1.047217D+04*TM1          
     &         +2.920011D+01-6.106457D-04*TP1+5.988591D-08*TP2                  
     &         -3.203654D-12*TP3)                                               
      RF(62) =1.2D+13                                                           
      RB(62) = EXP(-2.873299D+07*TM3+2.753091D+05*TM2-3.061751D+04*TM1          
     &         +3.39501D+01-4.398277D-04*TP1+7.084785D-08*TP2                   
     &         -4.605436D-12*TP3)                                               
      RF(63) =1.D+13                                                            
      RB(63) = EXP(-2.98843D+07*TM3+3.126185D+05*TM2-4.167666D+04*TM1           
     &         +3.500252D+01+1.04897D-04*TP1-7.108023D-08*TP2                   
     &         +7.432422D-12*TP3)                                               
      RF(64) =1.5D+13                                                           
      RB(64) = EXP(-5.009741D+07*TM3+5.159376D+05*TM2-3.281711D+04*TM1          
     &         +3.643466D+01-4.529915D-04*TP1+5.485006D-08*TP2                  
     &         -3.270677D-12*TP3)                                               
      RF(65) =3.D+12                                                            
      RB(65) = EXP(-6.374462D+07*TM3+6.590446D+05*TM2-3.618157D+04*TM1          
     &         +3.521772D+01-2.946027D-04*TP1-4.98899D-09*TP2                   
     &         +2.438933D-12*TP3)                                               
      RF(66) =2.4D+13                                                           
      RB(66) = EXP(-3.629555D+07*TM3+3.488156D+05*TM2-3.909329D+04*TM1          
     &         +3.378717D+01-6.244992D-06*TP1-1.642377D-08*TP2                  
     &         +1.82399D-12*TP3)                                                
      RF(67) =8.3D+17 * EXP( -1.2*ALOGT-1.55D+01*RTR)                           
      RB(67) = EXP(+2.5955D+07*TM3-3.361641D+05*TM2+3.932192D+03*TM1            
     &         +3.006486D+01-4.493871D-04*TP1+1.197865D-07*TP2                  
     &         -1.088575D-11*TP3)                                               
      RF(68) =3.2D+13                                                           
      RB(68) = EXP(+2.806507D+06*TM3-1.381715D+05*TM2-5.160418D+03*TM1          
     &         +2.506242D+01+1.119385D-03*TP1-1.916843D-07*TP2                  
     &         +1.449326D-11*TP3)                                               
      RF(69) =6.D+12                                                            
      RB(69) = EXP(-5.62088D+06*TM3-1.301232D+04*TM2-4.109481D+04*TM1           
     &         +2.703328D+01+5.246798D-04*TP1-6.254974D-08*TP2                  
     &         +3.622519D-12*TP3)                                               
      RF(70) =1.8D+13                                                           
      RB(70) = EXP(-1.584691D+07*TM3+1.069266D+05*TM2-4.965252D+04*TM1          
     &         +3.097381D+01+3.36699D-04*TP1-4.235125D-08*TP2                   
     &         +2.459333D-12*TP3)                                               
      RF(71) =9.033D+13 * EXP(-1.198D+01*RTR)                                   
      RB(71) = EXP(-1.103473D+06*TM3-2.23713D+04*TM2-2.022049D+04*TM1           
     &         +2.9925D+01+2.852181D-04*TP1-3.826971D-08*TP2                    
     &         +2.333418D-12*TP3)                                               
      RF(72) =2.2D+10 * EXP(-1.748*RTR)                                         
      RB(72) = EXP(-1.103473D+06*TM3-2.23713D+04*TM2-1.507158D+04*TM1           
     &         +2.160482D+01+2.852181D-04*TP1-3.826971D-08*TP2                  
     &         +2.333418D-12*TP3)                                               
      RF(73) =3.D+11                                                            
      RB(73) = EXP(-1.283926D+06*TM3-3.491985D+04*TM2-3.352923D+04*TM1          
     &         +2.675123D+01-1.5147D-04*TP1+5.941307D-08*TP2                    
     &         -5.220379D-12*TP3)                                               
      RF(74) =1.6D+13 * EXP(-1.18D+01*RTR)                                      
      RB(74) = EXP(+2.271153D+07*TM3-2.592214D+05*TM2-2.33087D+04*TM1           
     &         +3.134291D+01+6.624422D-05*TP1-1.105558D-08*TP2                  
     &         +6.985449D-13*TP3)                                               
      RF(75) =9.D+13                                                            
      RB(75) = EXP(-2.435232D+06*TM3+2.389512D+03*TM2-4.458838D+04*TM1          
     &         +3.368976D+01+3.932548D-04*TP1-8.2515D-08*TP2                    
     &         +6.817479D-12*TP3)                                               
      RF(76) =6.D+13                                                            
      RB(76) = EXP(-8.846487D+06*TM3+3.858665D+04*TM2-4.200501D+04*TM1          
     &         +3.119347D+01+2.821127D-04*TP1-2.785855D-08*TP2                  
     &         +1.209047D-12*TP3)                                               
      RF(80) =3.2D+13 * EXP(-6.095*RTR)                                         
      RB(80) = EXP(+3.453024D+07*TM3-3.976691D+05*TM2-5.673598D+03*TM1          
     &         +2.637417D+01+6.185435D-04*TP1-6.107755D-08*TP2                  
     &         +2.491241D-12*TP3)                                               
      RF(81) =8.D+12 * EXP(-6.095*RTR)                                          
      RB(81) = EXP(+7.081175D+06*TM3-8.744014D+04*TM2-2.761875D+03*TM1          
     &         +2.849786D+01+3.301857D-04*TP1-4.964277D-08*TP2                  
     &         +3.106184D-12*TP3)                                               
      RF(82) =3.88D+05 * EXP( 2.5*ALOGT-3.08*RTR)                               
      RB(82) = EXP(-4.355695D+06*TM3+1.8211D+04*TM2-5.571573D+03*TM1            
     &         +2.512933D+01+2.04969D-03*TP1-2.629281D-07*TP2                   
     &         +1.717857D-11*TP3)                                               
      RF(83) =1.D+06 * EXP( 2.1*ALOGT-4.967D-01*RTR)                            
      RB(83) = EXP(-3.642593D+07*TM3+3.875726D+05*TM2-9.594371D+03*TM1          
     &         +2.960748D+01+1.330349D-03*TP1-1.966065D-07*TP2                  
     &         +1.416952D-11*TP3)                                               
      RF(84) =7.1D+06 * EXP( 1.8*ALOGT+5.96D-01*RTR)                            
      RB(84) = EXP(-4.77322D+06*TM3+3.1739D+04*TM2-1.171381D+04*TM1             
     &         +2.594221D+01+1.436455D-03*TP1-1.82025D-07*TP2                   
     &         +1.170897D-11*TP3)                                               
      RF(85) =2.05D+13 * EXP(-4.49D+01*RTR)                                     
      RB(85) = EXP(+3.519208D+07*TM3-3.711869D+05*TM2+2.306908D+03*TM1          
     &         +2.546386D+01+2.914631D-04*TP1-2.184595D-08*TP2                  
     &         +5.094279D-13*TP3)                                               
      RF(86) =9.635D+03 * EXP( 2.9*ALOGT-1.311D+01*RTR)                         
      RB(86) = EXP(-2.698801D+07*TM3+2.977382D+05*TM2-5.576083D+03*TM1          
     &         +2.922934D+01+1.603379D-03*TP1-1.916514D-07*TP2                  
     &         +1.213123D-11*TP3)                                               
      RF(87) =3.98D+13 * EXP(-1.94D+01*RTR)                                     
      RB(87) = EXP(+3.501163D+07*TM3-3.837355D+05*TM2-4.198348D+03*TM1          
     &         +2.866097D+01-1.45225D-04*TP1+7.583684D-08*TP2                   
     &         -7.044369D-12*TP3)                                               
      RF(88) =3.19D+01 * EXP( 3.17*ALOGT-7.172*RTR)                             
      RB(88) = EXP(-4.961335D+07*TM3+5.194219D+05*TM2-1.088531D+04*TM1          
     &         +2.643558D+01+1.662228D-03*TP1-1.961369D-07*TP2                  
     &         +1.235487D-11*TP3)                                               
      RF(89) =3.D+11 * EXP(-4.06*RTR)                                           
      RB(89) = EXP(+2.744906D+07*TM3-3.10229D+05*TM2-4.954782D+03*TM1           
     &         +2.291706D+01+2.883577D-04*TP1-1.143478D-08*TP2                  
     &         -6.149431D-13*TP3)                                               
      RF(90) =4.99D+12 * EXP( 0.1*ALOGT-1.06D+01*RTR)                           
      RB(90) = EXP(+1.050779D+07*TM3+3.225136D+03*TM2-5.881392D+02*TM1          
     &         +3.436729D+01-1.061672D-03*TP1+1.821881D-07*TP2                  
     &         -1.390012D-11*TP3)                                               
      RF(91) =2.46D+06 * EXP( 2.*ALOGT-8.27*RTR)                                
      RB(91) = EXP(-6.707404D+05*TM3+2.895668D+04*TM2-7.704176D+03*TM1          
     &         +2.66728D+01+1.457921D-03*TP1-2.25329D-07*TP2                    
     &         +1.654486D-11*TP3)                                               
      RF(92) =1.6D+13 * EXP(+5.7D-01*RTR)                                       
      RB(92) = EXP(+3.64636D+07*TM3-3.646426D+05*TM2-5.851718D+03*TM1           
     &         +2.725258D+01+3.206675D-04*TP1-6.665313D-08*TP2                  
     &         +5.354331D-12*TP3)                                               
      RF(93) =5.6D+07 * EXP( 1.6*ALOGT-5.42*RTR)                                
      RB(93) = EXP(-2.41295D+07*TM3+2.388778D+05*TM2-7.938392D+03*TM1           
     &         +2.812216D+01+1.33561D-03*TP1-1.915618D-07*TP2                   
     &         +1.338475D-11*TP3)                                               
      RF(94) =2.501D+13                                                         
      RB(94) = EXP(-1.082011D+07*TM3+8.522104D+04*TM2+2.94026D+02*TM1           
     &         +3.085519D+01+2.858423D-04*TP1-3.804258D-08*TP2                  
     &         +2.428029D-12*TP3)                                               
      RF(95) =4.D+13                                                            
      RB(95) = EXP(+8.900455D+05*TM3+1.123445D+05*TM2-3.316372D+04*TM1          
     &         +3.986283D+01-1.351066D-03*TP1+2.249126D-07*TP2                  
     &         -1.712367D-11*TP3)                                               
      RF(96) =1.2D+13 * EXP(+5.7D-01*RTR)                                       
      RB(96) = EXP(+1.00001D+07*TM3+2.27763D+04*TM2-3.708898D+04*TM1            
     &         +3.765323D+01-1.273308D-03*TP1+2.101468D-07*TP2                  
     &         -1.601017D-11*TP3)                                               
      RF(97) =1.6D+13                                                           
      RB(97) = EXP(-8.013605D+06*TM3-5.29505D+04*TM2-4.866392D+03*TM1           
     &         +2.437417D+01+1.405227D-03*TP1-2.297269D-07*TP2                  
     &         +1.692129D-11*TP3)                                               
      RF(99) =1.15D+08 * EXP( 1.9*ALOGT-7.53*RTR)                               
      RB(99) = EXP(-1.41839D+07*TM3+1.16762D+05*TM2-6.398287D+03*TM1            
     &         +2.648665D+01+1.841371D-03*TP1-2.635358D-07*TP2                  
     &         +1.880799D-11*TP3)                                               
      RF(100) =8.98D+07 * EXP( 1.92*ALOGT-5.69*RTR)                             
      RB(100) = EXP(-1.831971D+07*TM3+1.556435D+05*TM2-4.88356D+03*TM1          
     &          +2.573532D+01+1.765903D-03*TP1-2.503187D-07*TP2                 
     &          +1.823832D-11*TP3)                                              
      RF(101) =3.54D+06 * EXP( 2.12*ALOGT-8.7D-01*RTR)                          
      RB(101) = EXP(-3.134817D+07*TM3+3.059855D+05*TM2-1.117737D+04*TM1         
     &          +2.675403D+01+1.699423D-03*TP1-2.474644D-07*TP2                 
     &          +1.830554D-11*TP3)                                              
      RF(102) =4.D+13 * EXP(-5.09D+01*RTR)                                      
      RB(102) = EXP(+1.310102D+07*TM3-1.455854D+05*TM2+8.203429D+02*TM1         
     &          +2.538369D+01+3.600295D-04*TP1-5.953463D-08*TP2                 
     &          +5.13735D-12*TP3)                                               
      RF(103) =2.94D+11 * EXP(-1.494D+01*RTR)                                   
      RB(103) = EXP(+1.292057D+07*TM3-1.581339D+05*TM2-4.21266D+02*TM1          
     &          +2.300432D+01-7.665856D-05*TP1+3.814816D-08*TP2                 
     &          -2.416447D-12*TP3)                                              
      RF(104) =6.14D+06 * EXP( 1.74*ALOGT-1.045D+01*RTR)                        
      RB(104) = EXP(-5.166704D+07*TM3+5.276412D+05*TM2-9.846598D+03*TM1         
     &          +2.777138D+01+8.620611D-04*TP1-1.098147D-07*TP2                 
     &          +8.185412D-12*TP3)                                              
      RF(106) =2.D+12                                                           
      RB(106) = EXP(+1.352571D+06*TM3-3.58063D+04*TM2-3.395582D+04*TM1          
     &          +2.924576D+01+4.10557D-04*TP1-5.3906D-08*TP2                    
     &          +2.789079D-12*TP3)                                              
      RF(107) =1.32D+14                                                         
      RB(107) = EXP(-2.03364D+07*TM3+1.371356D+05*TM2-4.076116D+04*TM1          
     &          +3.173495D+01+5.277183D-04*TP1-6.172556D-08*TP2                 
     &          +3.644576D-12*TP3)                                              
      RF(108) =2.D+10                                                           
      RB(108) = EXP(+2.01441D+06*TM3-9.324108D+03*TM2-6.447991D+03*TM1          
     &          +2.417558D+01+8.347665D-05*TP1-1.46744D-08*TP2                  
     &          +8.072654D-13*TP3)                                              
      RF(109) =1.4D+12                                                          
      RB(109) = EXP(-1.108661D+07*TM3+1.362613D+05*TM2-3.288206D+04*TM1         
     &          +3.436028D+01-2.765529D-04*TP1+4.486023D-08*TP2                 
     &          -4.330085D-12*TP3)                                              
      RF(110) =1.2D+14                                                          
      RB(110) = EXP(-7.793238D+06*TM3+8.701695D+04*TM2-4.32094D+04*TM1          
     &          +3.823604D+01+3.63306D-05*TP1-3.339155D-08*TP2                  
     &          +2.8045D-12*TP3)                                                
      RF(111) =8.02D+13                                                         
      RB(111) = EXP(+1.363309D+07*TM3-1.224103D+05*TM2-3.766505D+04*TM1         
     &          +3.536948D+01-3.928166D-04*TP1+8.34537D-08*TP2                  
     &          -6.880639D-12*TP3)                                              
      RF(115) =1.325D+06 * EXP( 2.53*ALOGT-1.224D+01*RTR)                       
      RB(115) = EXP(-1.692063D+07*TM3+1.445449D+05*TM2-3.635529D+03*TM1         
     &          +2.652322D+01+2.312013D-03*TP1-3.371275D-07*TP2                 
     &          +2.343213D-11*TP3)                                              
      RF(116) =1.8D+06 * EXP( 2.*ALOGT-2.5*RTR)                                 
      RB(116) = EXP(-2.357579D+07*TM3+2.197567D+05*TM2-6.258662D+03*TM1         
     &          +2.528933D+01+1.714435D-03*TP1-2.560154D-07*TP2                 
     &          +1.831566D-11*TP3)                                              
      RF(117) =2.27D+05 * EXP( 2.*ALOGT-9.2*RTR)                                
      RB(117) = EXP(-4.921928D+07*TM3+4.991783D+05*TM2-3.785688D+03*TM1         
     &          +2.636487D+01+1.107925D-03*TP1-1.513197D-07*TP2                 
     &          +1.05333D-11*TP3)                                               
      RF(118) =1.92D+07 * EXP( 1.83*ALOGT-2.2D-01*RTR)                          
      RB(118) = EXP(-2.644817D+07*TM3+1.965683D+05*TM2-1.436574D+04*TM1         
     &          +2.364369D+01+2.00583D-03*TP1-2.874353D-07*TP2                  
     &          +2.031454D-11*TP3)                                              
      RF(119) =5.D+12                                                           
      RB(119) = EXP(+6.290374D+06*TM3-1.128041D+05*TM2-4.160927D+04*TM1         
     &          +3.163758D+01+3.969016D-04*TP1-9.347877D-08*TP2                 
     &          +7.328158D-12*TP3)                                              
      RF(120) =1.51D+07 * EXP( 1.91*ALOGT-3.74*RTR)                             
      RB(120) = EXP(-1.208867D+07*TM3+8.613644D+04*TM2+1.747777D+03*TM1         
     &          +2.393971D+01+1.847741D-03*TP1-2.68409D-07*TP2                  
     &          +1.892517D-11*TP3)                                              
      RF(121) =4.215D+13 * EXP(-5.76D+01*RTR)                                   
      RB(121) = EXP(+1.919193D+07*TM3-2.135723D+05*TM2+3.090776D+03*TM1         
     &          +2.549385D+01+4.479423D-04*TP1-7.849213D-08*TP2                 
     &          +5.885717D-12*TP3)                                              
      RF(122) =9.64D+13                                                         
      RB(122) = EXP(+2.037197D+07*TM3-2.685841D+05*TM2-3.365653D+04*TM1         
     &          +3.239974D+01+6.725011D-04*TP1-1.286288D-07*TP2                 
     &          +9.184056D-12*TP3)                                              
      RF(123) =6.D+13                                                           
      RB(123) = EXP(+1.969353D+07*TM3-2.132018D+05*TM2-4.478443D+04*TM1         
     &          +3.553318D+01-2.843061D-04*TP1+6.191277D-08*TP2                 
     &          -5.188546D-12*TP3)                                              
      RF(124) =1.21D+10 * EXP(+5.96D-01*RTR)                                    
      RB(124) = EXP(-1.901148D+07*TM3+2.261208D+05*TM2-1.243886D+04*TM1         
     &          +2.656121D+01-1.125418D-05*TP1-1.919066D-08*TP2                 
     &          +1.66808D-12*TP3)                                               
      RF(125) =3.9D+11                                                          
      RB(125) = EXP(-1.935312D+07*TM3+1.666175D+05*TM2-3.576474D+04*TM1         
     &          +3.223266D+01-2.096083D-04*TP1+1.121694D-08*TP2                 
     &          -4.542015D-13*TP3)                                              
      RF(126) =9.6D+11                                                          
      RB(126) = EXP(+1.841873D+06*TM3-2.852967D+04*TM2-3.822476D+04*TM1         
     &          +3.320382D+01-1.025215D-04*TP1-1.090511D-08*TP2                 
     &          +1.316526D-12*TP3)                                              
      RF(127) =4.58D+16 * EXP( -1.39*ALOGT-1.015*RTR)                           
      RB(127) = EXP(-1.09832D+07*TM3+5.9039D+04*TM2-4.495084D+04*TM1            
     &          +2.880527D+01-7.883484D-04*TP1+1.349372D-07*TP2                 
     &          -9.949492D-12*TP3)                                              
      RF(128) =1.337D+06 * EXP( 1.61*ALOGT+3.84D-01*RTR)                        
      RB(128) = EXP(-1.525747D+06*TM3+2.643119D+03*TM2-7.256443D+03*TM1         
     &          +2.519368D+01+1.323505D-03*TP1-2.290178D-07*TP2                 
     &          +1.710699D-11*TP3)                                              
      RF(129) =1.D+11 * EXP( 0.29*ALOGT-1.1D-02*RTR)                            
      RB(129) = EXP(+1.623535D+06*TM3-2.333843D+04*TM2-3.050737D+03*TM1         
     &          +2.836963D+01-7.803652D-05*TP1+8.024747D-09*TP2                 
     &          +1.630912D-13*TP3)                                              
      RF(131) =1.632D+07 * EXP( 2.*ALOGT-1.9*RTR)                               
      RB(131) = EXP(-1.370106D+07*TM3+1.759531D+05*TM2-1.204913D+04*TM1         
     &          +3.042976D+01+1.044629D-03*TP1-1.042308D-07*TP2                 
     &          +6.172093D-12*TP3)                                              
      RF(132) =4.6D+19 * EXP( -1.41*ALOGT-2.895D+01*RTR)                        
      RB(132) = EXP(+4.499982D+06*TM3-1.448478D+05*TM2+1.791107D+03*TM1         
     &          +3.055794D+01-3.761643D-04*TP1+3.471489D-08*TP2                 
     &          -6.102605D-13*TP3)                                              
      RF(133) =4.08D+06 * EXP( 2.*ALOGT-1.9*RTR)                                
      RB(133) = EXP(-5.071482D+07*TM3+4.858718D+05*TM2-2.650869D+04*TM1         
     &          +2.565548D+01+2.024222D-03*TP1-2.759416D-07*TP2                 
     &          +1.962988D-11*TP3)                                              
      RF(134) =2.18D-04 * EXP( 4.5*ALOGT+1.*RTR)                                
      RB(134) = EXP(-5.987753D+07*TM3+7.036112D+05*TM2-1.48659D+04*TM1          
     &          +2.755229D+01+1.864589D-03*TP1-2.146538D-07*TP2                 
     &          +1.400418D-11*TP3)                                              
      RF(135) =5.04D+05 * EXP( 2.3*ALOGT-1.35D+01*RTR)                          
      RB(135) = EXP(-1.786684D+07*TM3+2.258026D+05*TM2-4.656333D+03*TM1         
     &          +3.364903D+01+4.734558D-04*TP1-3.521325D-08*TP2                 
     &          +2.049635D-12*TP3)                                              
      RF(136) =3.37D+07 * EXP( 2.*ALOGT-1.4D+01*RTR)                            
      RB(136) = EXP(-5.350746D+07*TM3+4.934642D+05*TM2-1.998981D+03*TM1         
     &          +2.950251D+01+1.50745D-03*TP1-2.408047D-07*TP2                  
     &          +1.920493D-11*TP3)                                              
      RF(137) =4.83D-04 * EXP( 4.*ALOGT+2.*RTR)                                 
      RB(137) = EXP(-8.725508D+07*TM3+9.141889D+05*TM2-3.08019D+04*TM1          
     &          +2.074356D+01+2.687653D-03*TP1-3.763764D-07*TP2                 
     &          +2.72292D-11*TP3)                                               
      RF(138) =6.03D+09 * EXP(-7.944*RTR)                                       
      RB(138) = EXP(-7.892511D+06*TM3+5.14884D+04*TM2-3.431267D+04*TM1          
     &          +2.316338D+01-1.856265D-04*TP1+6.253469D-08*TP2                 
     &          -4.799767D-12*TP3)                                              
      RF(139) =1.D+14                                                           
      RB(139) = EXP(-4.612381D+07*TM3+3.994868D+05*TM2-1.024747D+04*TM1         
     &          +2.985383D+01+9.018354D-04*TP1-1.569449D-07*TP2                 
     &          +1.234429D-11*TP3)                                              
      RF(140) =1.D+14                                                           
      RB(140) = EXP(-2.137797D+07*TM3+1.507004D+05*TM2-5.222056D+04*TM1         
     &          +3.071759D+01+9.133833D-04*TP1-1.144693D-07*TP2                 
     &          +7.495569D-12*TP3)                                              
      RF(141) =1.6D+12 * EXP(-8.54D-01*RTR)                                     
      RB(141) = EXP(-2.793021D+07*TM3+1.732887D+05*TM2-4.432971D+04*TM1         
     &          +2.315318D+01+1.357484D-03*TP1-2.032446D-07*TP2                 
     &          +1.508659D-11*TP3)                                              
      RF(142) =1.D+13                                                           
      RB(142) = EXP(-2.216835D+07*TM3+1.999099D+05*TM2-8.542376D+03*TM1         
     &          +2.871368D+01+2.775614D-04*TP1+2.736944D-09*TP2                 
     &          -1.735382D-12*TP3)                                              
      RF(143) =3.D+13                                                           
      RB(143) = EXP(-2.996515D+07*TM3+3.423358D+05*TM2-4.708973D+04*TM1         
     &          +3.397139D+01-2.356499D-04*TP1+2.343667D-08*TP2                 
     &          -1.195773D-12*TP3)                                              
      RF(144) =1.D+13                                                           
      RB(144) = EXP(-3.570121D+07*TM3+2.787784D+05*TM2-4.274366D+04*TM1         
     &          +2.869567D+01+1.083767D-03*TP1-1.836801D-07*TP2                 
     &          +1.362751D-11*TP3)                                              
      RF(145) =5.D+13                                                           
      RB(145) = EXP(-3.612371D+07*TM3+4.222631D+05*TM2-4.762329D+04*TM1         
     &          +3.669799D+01-3.714724D-04*TP1+5.320188D-08*TP2                 
     &          -3.665876D-12*TP3)                                              
      RF(147) =2.D+13                                                           
      RB(147) = EXP(+2.958038D+07*TM3-1.975722D+05*TM2-2.469677D+04*TM1         
     &          +3.512102D+01-6.508026D-04*TP1+1.567724D-07*TP2                 
     &          -1.419602D-11*TP3)                                              
      RF(148) =5.D+13 * EXP(-1.5*RTR)                                           
      RB(148) = EXP(+1.031838D+10*TM3-6.599006D+07*TM2+7.63924D+04*TM1          
     &          -1.336823D+02+8.745778D-02*TP1-2.168772D-05*TP2                 
     &          +2.026219D-09*TP3)                                              
      RF(149) =4.9D+05 * EXP( 2.5*ALOGT-5.6D-01*RTR)                            
      RB(149) = EXP(-2.362879D+07*TM3+3.463859D+05*TM2-1.691684D+04*TM1         
     &          +3.486026D+01+9.507273D-04*TP1-1.14289D-07*TP2                  
     &          +6.623245D-12*TP3)                                              
      RF(151) =8.D+13                                                           
      RB(151) = EXP(+8.410831D+04*TM3+3.072428D+04*TM2-4.594001D+04*TM1         
     &          +3.452543D+01-4.569727D-04*TP1+9.617649D-08*TP2                 
     &          -8.067318D-12*TP3)                                              
      RF(152) =2.D+13                                                           
      RB(152) = EXP(-1.694335D+07*TM3+2.494452D+05*TM2-4.057403D+04*TM1         
     &          +3.811424D+01-1.146286D-03*TP1+2.021415D-07*TP2                 
     &          -1.557546D-11*TP3)                                              
      RF(153) =5.D+05 * EXP( 2.*ALOGT-7.23*RTR)                                 
      RB(153) = EXP(-4.039583D+07*TM3+4.641583D+05*TM2-9.289039D+03*TM1         
     &          +3.042253D+01+5.75812D-04*TP1-8.548319D-08*TP2                  
     &          +6.906603D-12*TP3)                                              
      RF(154) =1.32D+13 * EXP(-1.5*RTR)                                         
      RB(154) = EXP(-6.468128D+06*TM3+5.331257D+04*TM2-3.837423D+04*TM1         
     &          +2.929439D+01-1.287238D-05*TP1+7.401182D-09*TP2                 
     &          -4.762963D-13*TP3)                                              
      RF(155) =2.D+13                                                           
      RB(155) = EXP(-2.8013D+07*TM3+2.813925D+05*TM2-5.915629D+04*TM1           
     &          +3.4505D+01-4.627242D-04*TP1+8.908618D-08*TP2                   
     &          -6.695334D-12*TP3)                                              
      RF(157) =3.2D+13                                                          
      RB(157) = EXP(+2.742058D+07*TM3-2.36167D+05*TM2-6.62867D+04*TM1           
     &          +3.762413D+01-5.427425D-04*TP1+6.65186D-08*TP2                  
     &          -5.469507D-12*TP3)                                              
      RF(158) =9.D+12 * EXP(-6.D-01*RTR)                                        
      RB(158) = EXP(+9.110051D+06*TM3-8.956815D+04*TM2-4.514022D+03*TM1         
     &          +2.882262D+01+7.77583D-05*TP1-1.476587D-08*TP2                  
     &          +1.113501D-12*TP3)                                              
      RF(159) =3.D+13                                                           
      RB(159) = EXP(+9.11005D+06*TM3-8.956815D+04*TM2-4.212092D+03*TM1          
     &          +3.002659D+01+7.77583D-05*TP1-1.476587D-08*TP2                  
     &          +1.113501D-12*TP3)                                              
      RF(160) =9.D+12                                                           
      RB(160) = EXP(+9.110051D+06*TM3-8.956815D+04*TM2-4.212092D+03*TM1         
     &          +2.882262D+01+7.77583D-05*TP1-1.476587D-08*TP2                  
     &          +1.113501D-12*TP3)                                              
      RF(161) =7.D+12                                                           
      RB(161) = EXP(+9.110051D+06*TM3-8.956815D+04*TM2-4.212092D+03*TM1         
     &          +2.857131D+01+7.77583D-05*TP1-1.476587D-08*TP2                  
     &          +1.113501D-12*TP3)                                              
      RF(162) =1.5D+13                                                          
      RB(162) = EXP(+1.878742D+10*TM3-9.687082D+07*TM2+8.957323D+04*TM1         
     &          -1.336092D+02+7.574368D-02*TP1-1.668912D-05*TP2                 
     &          +1.41452D-09*TP3)                                               
      RF(163) =1.5D+13                                                          
      RB(163) = EXP(+9.194159D+06*TM3-5.884387D+04*TM2-5.01521D+04*TM1          
     &          +3.184583D+01-3.792144D-04*TP1+8.141062D-08*TP2                 
     &          -6.953817D-12*TP3)                                              
      RF(164) =3.D+13                                                           
      RB(164) = EXP(-7.833302D+06*TM3+1.598771D+05*TM2-4.478612D+04*TM1         
     &          +3.751408D+01-1.068528D-03*TP1+1.873756D-07*TP2                 
     &          -1.446196D-11*TP3)                                              
      RF(165) =7.D+13                                                           
      RB(165) = EXP(-3.261484D+06*TM3+7.055903D+04*TM2-8.24676D+03*TM1          
     &          +3.407153D+01-5.614419D-04*TP1+7.319264D-08*TP2                 
     &          -4.283927D-12*TP3)                                              
      RF(166) =2.8D+13                                                          
      RB(166) = EXP(+1.81936D+07*TM3-2.261981D+05*TM2-3.365249D+04*TM1          
     &          +2.839775D+01+4.556481D-04*TP1-4.629967D-08*TP2                 
     &          +2.742302D-12*TP3)                                              
      RF(167) =1.2D+13                                                          
      RB(167) = EXP(+1.873357D+10*TM3-9.70388D+07*TM2+9.168134D+04*TM1          
     &          -1.376355D+02+7.752113D-02*TP1-1.718728D-05*TP2                 
     &          +1.464788D-09*TP3)                                              
      RF(168) =1.4D+13                                                          
      RB(168) = EXP(-2.773832D+07*TM3+2.809269D+05*TM2-3.25758D+04*TM1          
     &          +2.97783D+01-1.538759D-05*TP1+6.746906D-09*TP2                  
     &          -6.672408D-13*TP3)                                              
      RF(169) =7.D+15 * EXP(-8.1674D+01*RTR)                                    
      RB(169) = EXP(-2.180718D+06*TM3-9.990806D+04*TM2+2.295388D+03*TM1         
     &          +2.703247D+01+1.364789D-03*TP1-1.728731D-07*TP2                 
     &          +1.09075D-11*TP3)                                               
      RF(171) =3.37D+12 * EXP(+6.2D-01*RTR)                                     
      RB(171) = EXP(+5.146037D+06*TM3-6.322482D+04*TM2-1.41626D+04*TM1          
     &          +2.710545D+01+7.026475D-04*TP1-7.842091D-08*TP2                 
     &          +4.333991D-12*TP3)                                              
      RF(172) =3.37D+11 * EXP(+6.2D-01*RTR)                                     
      RB(172) = EXP(+5.51709D+05*TM3-5.184045D+04*TM2-9.889783D+03*TM1          
     &          +2.467506D+01+5.168645D-04*TP1-8.303269D-08*TP2                 
     &          +5.776624D-12*TP3)                                              
      RF(173) =1.77D+18 * EXP( -1.9*ALOGT-2.975*RTR)                            
      RB(173) = EXP(+4.199514D+07*TM3-4.719933D+05*TM2-5.878657D+03*TM1         
     &          +2.403771D+01-2.636332D-04*TP1+6.615022D-08*TP2                 
     &          -6.191652D-12*TP3)                                              
      RF(174) =3.72D+13 * EXP(-0.2*ALOGT-3.556*RTR)                             
      RB(174) = EXP(+1.358017D+07*TM3-2.021825D+05*TM2-3.271901D+03*TM1         
     &          +2.512687D+01+5.833441D-04*TP1-8.5887D-08*TP2                   
     &          +5.709407D-12*TP3)                                              
      RF(175) =4.66D+13 * EXP(-0.35*ALOGT-2.988*RTR)                            
      RB(175) = EXP(+2.413188D+07*TM3-2.722103D+05*TM2-7.742657D+03*TM1         
     &          +2.506729D+01+7.656199D-04*TP1-8.321867D-08*TP2                 
     &          +4.036683D-12*TP3)                                              
      RF(176) =1.85D+12 * EXP( 0.4*ALOGT-5.359*RTR)                             
      RB(176) = EXP(+9.028446D+06*TM3-1.468143D+05*TM2-5.269004D+03*TM1         
     &          +2.700152D+01+1.035466D-03*TP1-1.528711D-07*TP2                 
     &          +1.009333D-11*TP3)                                              
      RF(177) =3.9D-07 * EXP( 5.8*ALOGT-2.2*RTR)                                
      RB(177) = EXP(-1.017679D+08*TM3+1.097887D+06*TM2-1.442388D+04*TM1         
     &          +2.754588D+01+3.619673D-03*TP1-4.767061D-07*TP2                 
     &          +3.223332D-11*TP3)                                              
      RF(178) =2.45D+01 * EXP( 3.15*ALOGT-5.727*RTR)                            
      RB(178) = EXP(-6.923004D+07*TM3+7.064302D+05*TM2-9.784553D+03*TM1         
     &          +2.668801D+01+1.823999D-03*TP1-2.515077D-07*TP2                 
     &          +1.737311D-11*TP3)                                              
      RF(179) =3.6D+19 * EXP( -2.2*ALOGT-1.403D+01*RTR)                         
      RB(179) = EXP(+5.053574D+07*TM3-5.395055D+05*TM2-3.633722D+03*TM1         
     &          +2.764855D+01-1.122035D-03*TP1+2.141293D-07*TP2                 
     &          -1.688015D-11*TP3)                                              
      RF(180) =2.32D+11 * EXP( 0.4*ALOGT-1.4864D+01*RTR)                        
      RB(180) = EXP(+9.509832D+06*TM3-1.328806D+05*TM2-1.881531D+03*TM1         
     &          +2.699399D+01+2.71698D-04*TP1-1.59567D-08*TP2                   
     &          +5.577179D-13*TP3)                                              
      RF(181) =1.D+14 * EXP(-4.22D+01*RTR)                                      
      RB(181) = EXP(+1.988947D+07*TM3-1.925227D+05*TM2-2.497809D+02*TM1         
     &          +2.78338D+01+6.511666D-04*TP1-7.433937D-08*TP2                  
     &          +4.208076D-12*TP3)                                              
      RF(182) =1.75D+12 * EXP(-1.35*RTR)                                        
      RB(182) = EXP(-5.962639D+06*TM3+4.124965D+04*TM2-2.509328D+04*TM1         
     &          +2.724301D+01+6.252585D-04*TP1-9.746117D-08*TP2                 
     &          +7.211026D-12*TP3)                                              
      RF(183) =2.71D+04 * EXP( 2.75*ALOGT-7.14D-01*RTR)                         
      RB(183) = EXP(-7.291703D+07*TM3+7.046283D+05*TM2-1.94247D+04*TM1          
     &          +2.551965D+01+2.797459D-03*TP1-4.435653D-07*TP2                 
     &          +3.321907D-11*TP3)                                              
      RF(184) =2.D+14 * EXP(-8.*RTR)                                            
      RB(184) = EXP(+1.500167D+07*TM3-1.834603D+05*TM2-2.374744D+03*TM1         
     &          +2.904107D+01+7.864238D-04*TP1-1.213307D-07*TP2                 
     &          +8.240664D-12*TP3)                                              
      RF(185) =1.D+13 * EXP(-8.*RTR)                                            
      RB(185) = EXP(+1.11461D+07*TM3-1.476191D+05*TM2-1.769775D+03*TM1          
     &          +2.540032D+01+6.988052D-04*TP1-1.063791D-07*TP2                 
     &          +7.547952D-12*TP3)                                              
      RF(186) =1.D+13 * EXP(-2.*RTR)                                            
      RB(186) = EXP(+9.200747D+05*TM3-2.768024D+04*TM2-7.308178D+03*TM1         
     &          +2.824224D+01+5.108243D-04*TP1-8.618066D-08*TP2                 
     &          +6.384766D-12*TP3)                                              
      RF(187) =3.73D+12 * EXP(+1.013*RTR)                                       
      RB(187) = EXP(-9.741065D+06*TM3+1.145281D+05*TM2-1.408479D+04*TM1         
     &          +2.739315D+01+2.957906D-04*TP1-2.483343D-08*TP2                 
     &          +1.192822D-12*TP3)                                              
      RF(188) =5.D+13                                                           
      RB(188) = EXP(-2.771976D+07*TM3+2.126044D+05*TM2-6.818015D+03*TM1         
     &          +2.714535D+01+9.05003D-04*TP1-1.479131D-07*TP2                  
     &          +1.109354D-11*TP3)                                              
      RF(189) =2.D+13                                                           
      RB(189) = EXP(+1.130981D+07*TM3-1.590318D+05*TM2-3.425793D+04*TM1         
     &          +3.065401D+01+5.016262D-04*TP1-7.498791D-08*TP2                 
     &          +4.716181D-12*TP3)                                              
      RF(190) =1.D+14                                                           
      RB(190) = EXP(-3.614715D+07*TM3+3.377636D+05*TM2-4.275241D+04*TM1         
     &          +3.148333D+01+3.102983D-04*TP1-1.877853D-08*TP2                 
     &          +2.228027D-13*TP3)                                              
      RF(191) =3.D+13                                                           
      RB(191) = EXP(-2.771788D+06*TM3-3.251708D+03*TM2-4.221066D+04*TM1         
     &          +3.325638D+01+2.260266D-04*TP1-3.983784D-08*TP2                 
     &          +2.860283D-12*TP3)                                              
      RF(192) =3.D+10                                                           
      RB(192) = EXP(-2.71477D+07*TM3+1.704093D+05*TM2-2.62528D+04*TM1           
     &          +1.929937D+01+1.145161D-03*TP1-1.464888D-07*TP2                 
     &          +9.918921D-12*TP3)                                              
      RF(193) =4.9D+14 * EXP(-0.5*ALOGT)                                        
      RB(193) = EXP(+6.747002D+06*TM3-6.532238D+04*TM2+6.591787D+03*TM1         
     &          +2.96828D+01-1.304108D-04*TP1+4.737248D-08*TP2                  
     &          -4.392683D-12*TP3)                                              
      RF(194) =7.D+12                                                           
      RB(194) = EXP(-3.245549D+07*TM3+2.289778D+05*TM2-9.477474D+03*TM1         
     &          +2.487051D+01+7.488007D-04*TP1-5.356264D-08*TP2                 
     &          +1.977072D-12*TP3)                                              
      RF(195) =3.D+12                                                           
      RB(195) = EXP(-1.529514D+07*TM3+1.811383D+05*TM2-2.525878D+04*TM1         
     &          +3.325983D+01-4.653836D-04*TP1+7.895115D-08*TP2                 
     &          -5.650709D-12*TP3)                                              
      RF(196) =1.17D+43 * EXP( -9.83*ALOGT-4.3756D+01*RTR)                      
      RB(196) = EXP(+1.255713D+08*TM3-1.471651D+06*TM2-1.271455D+04*TM1         
     &          +2.481351D+01-4.676019D-03*TP1+6.656179D-07*TP2                 
     &          -4.727567D-11*TP3)                                              
      RF(197) =1.81D+43 * EXP( -9.61*ALOGT-4.5868D+01*RTR)                      
      RB(197) = EXP(+1.568723D+08*TM3-1.724793D+06*TM2+2.888124D+03*TM1         
     &          +3.087974D+01-5.669185D-03*TP1+8.516223D-07*TP2                 
     &          -6.222325D-11*TP3)                                              
      RF(198) =1.26D+51 * EXP( -10.59*ALOGT-1.00869D+02*RTR)                    
      RB(198) = EXP(+1.515791D+08*TM3-1.781605D+06*TM2+2.402767D+03*TM1         
     &          +3.267882D+01-4.903061D-03*TP1+7.289563D-07*TP2                 
     &          -5.326484D-11*TP3)                                              
      RF(199) =8.8D+25 * EXP( -3.68*ALOGT-7.0799D+01*RTR)                       
      RB(199) = EXP(+2.929259D+07*TM3-4.511222D+05*TM2-2.737967D+04*TM1         
     &          +2.849735D+01-8.616325D-04*TP1+1.215698D-07*TP2                 
     &          -9.228348D-12*TP3)                                              
      RF(200) =1.81D+11 * EXP( 0.39*ALOGT-7.165D-01*RTR)                        
      RB(200) = EXP(+5.670652D+06*TM3-8.244493D+04*TM2-7.819009D+03*TM1         
     &          +2.696971D+01+1.578538D-03*TP1-2.001166D-07*TP2                 
     &          +1.250479D-11*TP3)                                              
      RF(201) =3.09D+10 * EXP( 0.49*ALOGT+3.798D-01*RTR)                        
      RB(201) = EXP(-1.579222D+07*TM3+1.158463D+05*TM2-7.974786D+03*TM1         
     &          +2.646705D+01+9.46511D-04*TP1-1.531276D-07*TP2                  
     &          +1.099403D-11*TP3)                                              
      RF(202) =1.05D+10 * EXP( 0.79*ALOGT-7.169D-01*RTR)                        
      RB(202) = EXP(-3.269456D+07*TM3+3.001462D+05*TM2-8.762258D+03*TM1         
     &          +2.951339D+01+1.306615D-03*TP1-2.01223D-07*TP2                  
     &          +1.446605D-11*TP3)                                              
      RF(203) =1.9D+07 * EXP( 1.8*ALOGT-5.098*RTR)                              
      RB(203) = EXP(-4.878288D+03*TM3-2.388305D+04*TM2-3.21048D+03*TM1          
     &          +2.555328D+01+2.710721D-03*TP1-3.57543D-07*TP2                  
     &          +2.303503D-11*TP3)                                              
      RF(204) =2.58D+07 * EXP( 1.65*ALOGT-2.827*RTR)                            
      RB(204) = EXP(-1.796471D+07*TM3+1.364043D+05*TM2-2.573114D+03*TM1         
     &          +2.536148D+01+1.926818D-03*TP1-2.888739D-07*TP2                 
     &          +1.998626D-11*TP3)                                              
      RF(205) =1.5D+07 * EXP( 1.6*ALOGT-3.038*RTR)                              
      RB(205) = EXP(-2.99628D+07*TM3+2.674988D+05*TM2-2.632067D+03*TM1          
     &          +2.647693D+01+2.074295D-03*TP1-3.06617D-07*TP2                  
     &          +2.130508D-11*TP3)                                              
      RF(206) =9.41D+07 * EXP( 1.7*ALOGT-5.459*RTR)                             
      RB(206) = EXP(-2.459232D+06*TM3-3.243433D+03*TM2-2.706367D+03*TM1         
     &          +2.580306D+01+2.562352D-03*TP1-3.339194D-07*TP2                 
     &          +2.172711D-11*TP3)                                              
      RF(207) =1.88D+07 * EXP( 1.85*ALOGT-1.824*RTR)                            
      RB(207) = EXP(-2.462271D+07*TM3+2.026485D+05*TM2-1.62503D+03*TM1          
     &          +2.581021D+01+1.9607D-03*TP1-2.912665D-07*TP2                   
     &          +2.052396D-11*TP3)                                              
      RF(208) =1.58D+07 * EXP( 2.*ALOGT-4.448*RTR)                              
      RB(208) = EXP(-3.942323D+07*TM3+3.641462D+05*TM2-3.059856D+03*TM1         
     &          +2.870438D+01+2.229678D-03*TP1-3.263537D-07*TP2                 
     &          +2.307318D-11*TP3)                                              
      RF(209) =2.19D+02 * EXP( 3.18*ALOGT-9.622*RTR)                            
      RB(209) = EXP(-5.906673D+07*TM3+6.211001D+05*TM2-8.710359D+03*TM1         
     &          +2.925619D+01+2.66697D-03*TP1-3.37372D-07*TP2                   
     &          +2.188655D-11*TP3)                                              
      RF(210) =7.28D+02 * EXP( 2.99*ALOGT-7.948*RTR)                            
      RB(210) = EXP(-7.646608D+07*TM3+7.753068D+05*TM2-8.341091D+03*TM1         
     &          +2.967763D+01+1.858766D-03*TP1-2.65234D-07*TP2                  
     &          +1.859171D-11*TP3)                                              
      RF(211) =1.45D+02 * EXP( 2.99*ALOGT-7.649*RTR)                            
      RB(211) = EXP(-8.916477D+07*TM3+9.14002D+05*TM2-8.183806D+03*TM1          
     &          +3.00744D+01+2.036619D-03*TP1-2.873132D-07*TP2                  
     &          +2.021813D-11*TP3)                                              
      RF(212) =8.2D+03 * EXP( 2.55*ALOGT-1.075D+01*RTR)                         
      RB(212) = EXP(-3.009426D+07*TM3+2.871519D+05*TM2+8.831966D+02*TM1         
     &          +2.57223D+01+1.709804D-03*TP1-2.300083D-07*TP2                  
     &          +1.598747D-11*TP3)                                              
      RF(213) =2.43D+04 * EXP( 2.55*ALOGT-1.575D+01*RTR)                        
      RB(213) = EXP(-1.00326D+07*TM3+1.040623D+05*TM2-1.006239D+03*TM1          
     &          +2.624868D+01+2.402582D-03*TP1-2.856693D-07*TP2                 
     &          +1.811343D-11*TP3)                                              
      RF(214) =3.8D+12 * EXP(-2.4D+01*RTR)                                      
      RB(214) = EXP(-7.061981D+06*TM3+3.820748D+04*TM2-3.717055D+03*TM1         
     &          +2.970603D+01+3.385164D-04*TP1-3.09492D-08*TP2                  
     &          +1.92625D-12*TP3)                                               
      RF(215) =5.6D+34 * EXP( -5.89*ALOGT-2.5274D+01*RTR)                       
      RB(215) = EXP(+9.802048D+07*TM3-1.089576D+06*TM2+7.640183D+02*TM1         
     &          +3.539444D+01-3.746661D-03*TP1+5.683446D-07*TP2                 
     &          -4.140727D-11*TP3)                                              
      RF(216) =5.35D+37 * EXP( -6.96*ALOGT-2.38D+01*RTR)                        
      RB(216) = EXP(+7.904399D+07*TM3-9.926865D+05*TM2-7.257324D+02*TM1         
     &          +3.057887D+01-3.476158D-03*TP1+5.159566D-07*TP2                 
     &          -3.746471D-11*TP3)                                              
      RF(217) =4.D+10 * EXP(-1.1*RTR)                                           
      RB(217) = EXP(+5.245038D+06*TM3-6.282993D+04*TM2-1.678502D+04*TM1         
     &          +2.185221D+01-1.628526D-04*TP1+3.567563D-09*TP2                 
     &          +6.648523D-13*TP3)                                              
      RF(218) =4.68D+02 * EXP( 3.16*ALOGT-5.38*RTR)                             
      RB(218) = EXP(-3.727882D+07*TM3+4.282587D+05*TM2-2.294039D+04*TM1         
     &          +2.931024D+01+1.336004D-03*TP1-1.975753D-07*TP2                 
     &          +1.448025D-11*TP3)                                              
      RF(219) =3.D+13                                                           
      RB(219) = EXP(-1.719077D+05*TM3-9.114163D+04*TM2-8.047359D+03*TM1         
     &          +2.303899D+01+7.608218D-04*TP1-1.147768D-07*TP2                 
     &          +8.241706D-12*TP3)                                              
      RF(220) =3.D+13                                                           
      RB(220) = EXP(-2.563448D+07*TM3+1.889131D+05*TM2-4.737784D+04*TM1         
     &          +2.805684D+01+6.043832D-04*TP1-1.229221D-07*TP2                 
     &          +9.767774D-12*TP3)                                              
      RF(221) =1.D+13                                                           
      RB(221) = EXP(-9.498397D+06*TM3+6.646794D+04*TM2-5.169204D+04*TM1         
     &          +3.003558D+01-1.113718D-04*TP1-5.139765D-10*TP2                 
     &          +7.907677D-13*TP3)                                              
      RF(222) =4.82D+13 * EXP(-5.017*RTR)                                       
      RB(222) = EXP(-7.453657D+06*TM3+7.586535D+04*TM2-1.874929D+04*TM1         
     &          +3.095678D+01+1.499973D-05*TP1-1.851155D-08*TP2                 
     &          +2.291273D-12*TP3)                                              
      RF(223) =8.43D+14 * EXP( -1.2*ALOGT)                                      
      RB(223) = EXP(+9.360919D+06*TM3-1.065533D+05*TM2-1.525499D+04*TM1         
     &          +2.535687D+01-7.140075D-04*TP1+8.555347D-08*TP2                 
     &          -5.091146D-12*TP3)                                              
      RF(224) =1.D+14                                                           
      RB(224) = EXP(-1.197106D+07*TM3+8.522432D+04*TM2-4.312751D+04*TM1         
     &          +3.150658D+01+2.544614D-04*TP1-4.279158D-08*TP2                 
     &          +3.580374D-12*TP3)                                              
      RF(225) =3.D+13                                                           
      RB(225) = EXP(-3.833318D+07*TM3+3.276084D+05*TM2-4.737102D+04*TM1         
     &          +3.006718D+01+7.822355D-04*TP1-1.450012D-07*TP2                 
     &          +1.139419D-11*TP3)                                              
      RF(226) =3.D+13                                                           
      RB(226) = EXP(-1.28706D+07*TM3+4.755365D+04*TM2-8.040536D+03*TM1          
     &          +2.504932D+01+9.386742D-04*TP1-1.368559D-07*TP2                 
     &          +9.868127D-12*TP3)                                              
      RF(227) =4.D+13                                                           
      RB(227) = EXP(-8.279405D+06*TM3-2.356149D+04*TM2-9.852576D+03*TM1         
     &          +2.663673D+01+6.929638D-04*TP1-7.757569D-08*TP2                 
     &          +5.334643D-12*TP3)                                              
      RF(228) =5.D+12                                                           
      RB(228) = EXP(-2.219709D+07*TM3+2.051632D+05*TM2-5.168522D+04*TM1         
     &          +3.135277D+01+6.648059D-05*TP1-2.259309D-08*TP2                 
     &          +2.417188D-12*TP3)                                              
      RF(229) =1.D+14 * EXP(-2.5D+01*RTR)                                       
      RB(229) = EXP(+2.790239D+06*TM3-5.550875D+04*TM2-3.850735D+03*TM1         
     &          +3.116227D+01+9.401803D-06*TP1+3.547964D-08*TP2                 
     &          -3.54548D-12*TP3)                                               
      RF(230) =1.D+12 * EXP(+1.1*RTR)                                           
      RB(230) = EXP(-2.564886D+07*TM3+1.839504D+05*TM2-1.65583D+04*TM1          
     &          +3.27796D+01-1.046691D-03*TP1+4.641365D-08*TP2                  
     &          -4.74673D-13*TP3)                                               
      RF(231) =1.8D+11 * EXP(-2.45D+01*RTR)                                     
      RB(231) = EXP(-4.057166D+07*TM3+3.50924D+05*TM2-1.782384D+04*TM1          
     &          +1.633648D+01+1.133246D-03*TP1-6.009296D-08*TP2                 
     &          +2.048729D-12*TP3)                                              
      RF(232) =2.41D+11 * EXP(+2.385*RTR)                                       
      RB(232) = EXP(+3.34075D+07*TM3-2.500261D+05*TM2-1.121706D+04*TM1          
     &          +2.979938D+01-3.237918D-05*TP1+3.126744D-08*TP2                 
     &          -3.305567D-12*TP3)                                              
      RF(233) =4.D+13                                                           
      RB(233) = EXP(+1.835813D+06*TM3-3.69921D+04*TM2-1.311297D+04*TM1          
     &          +3.380453D+01+2.141364D-04*TP1-8.889168D-09*TP2                 
     &          +4.552986D-14*TP3)                                              
      RF(234) =1.69897D+42 * EXP( -7.95359*ALOGT-9.18066D+01*RTR)               
      RB(234) = EXP(+1.193512D+08*TM3-1.333608D+06*TM2+2.311471D+03*TM1         
     &          +3.219774D+01-3.371502D-03*TP1+4.705047D-07*TP2                 
     &          -3.395117D-11*TP3)                                              
      RF(235) =6.71D+06 * EXP( 2.*ALOGT+6.2988D-01*RTR)                         
      RB(235) = EXP(-2.173596D+07*TM3+1.918458D+05*TM2-1.172288D+04*TM1         
     &          +2.683035D+01+1.468604D-03*TP1-2.025629D-07*TP2                 
     &          +1.323221D-11*TP3)                                              
      RF(236) =2.97D+07 * EXP( 2.*ALOGT-4.03361*RTR)                            
      RB(236) = EXP(-7.654367D+06*TM3+3.606573D+04*TM2-6.116894D+03*TM1         
     &          +2.612099D+01+1.744204D-03*TP1-2.37713D-07*TP2                  
     &          +1.508811D-11*TP3)                                              
      RF(237) =2.68D+01 * EXP( 3.7779*ALOGT-9.6313*RTR)                         
      RB(237) = EXP(-7.229165D+07*TM3+7.415359D+05*TM2-1.24786D+04*TM1          
     &          +3.008223D+01+1.942179D-03*TP1-2.520482D-07*TP2                 
     &          +1.638752D-11*TP3)                                              
      RF(238) =1.855D-03 * EXP( 5.29*ALOGT+1.09D-01*RTR)                        
      RB(238) = EXP(-5.76099D+07*TM3+5.720381D+05*TM2-6.085803D+03*TM1          
     &          +2.517813D+01+3.65528D-03*TP1-5.08073D-07*TP2                   
     &          +3.463553D-11*TP3)                                              
      RF(239) =2.D+13 * EXP(-1.65D+01*RTR)                                      
      RB(239) = EXP(+2.085131D+07*TM3-2.540318D+05*TM2-2.603527D+03*TM1         
     &          +2.750723D+01-2.34577D-04*TP1+7.264309D-08*TP2                  
     &          -6.751531D-12*TP3)                                              
      RF(240) =4.1D+13 * EXP(-4.491D+01*RTR)                                    
      RB(240) = EXP(+2.103177D+07*TM3-2.414832D+05*TM2+2.437368D+03*TM1         
     &          +2.569139D+01+2.021111D-04*TP1-2.50397D-08*TP2                  
     &          +8.022662D-13*TP3)                                              
      RF(241) =6.02D+11 * EXP(-4.074*RTR)                                       
      RB(241) = EXP(+1.328875D+07*TM3-1.805253D+05*TM2-4.826335D+03*TM1         
     &          +2.314793D+01+1.990057D-04*TP1-1.462853D-08*TP2                 
     &          -3.221048D-13*TP3)                                              
      RF(242) =5.D+12 * EXP(-1.769D+01*RTR)                                     
      RB(242) = EXP(+4.010884D+07*TM3-3.878536D+05*TM2-2.082915D+03*TM1         
     &          +2.607174D+01-6.701717D-04*TP1+1.75378D-07*TP2                  
     &          -1.644599D-11*TP3)                                              
      RF(243) =1.2D+13 * EXP(-2.575D+01*RTR)                                    
      RB(243) = EXP(-1.423088D+07*TM3+9.457311D+04*TM2-1.010349D+04*TM1         
     &          +2.460166D+01+1.543459D-03*TP1-2.324674D-07*TP2                 
     &          +1.651059D-11*TP3)                                              
      RF(244) =2.41D+13                                                         
      RB(244) = EXP(-2.213524D+07*TM3+2.191119D+05*TM2-3.922878D+04*TM1         
     &          +3.425694D+01+8.310703D-05*TP1-1.323002D-08*TP2                 
     &          +1.531152D-12*TP3)                                              
      RF(245) =5.49D+03 * EXP( 2.8*ALOGT-5.862*RTR)                             
      RB(245) = EXP(-3.872091D+07*TM3+4.390469D+05*TM2-8.712362D+03*TM1         
     &          +2.921234D+01+1.948758D-03*TP1-2.994637D-07*TP2                 
     &          +2.264241D-11*TP3)                                              
      RF(246) =9.D+12                                                           
      RB(246) = EXP(-7.330277D+06*TM3+4.765515D+04*TM2-1.49915D+04*TM1          
     &          +3.215497D+01-3.830535D-04*TP1+8.157372D-08*TP2                 
     &          -6.514037D-12*TP3)                                              
      RF(247) =1.745D+16 * EXP(-0.66*ALOGT-1.172D+01*RTR)                       
      RB(247) = EXP(+2.777792D+07*TM3-2.984026D+05*TM2-3.796104D+03*TM1         
     &          +3.048948D+01-4.264025D-04*TP1+1.213075D-07*TP2                 
     &          -1.069724D-11*TP3)                                              
      RF(248) =1.392D+18 * EXP(-0.99*ALOGT-7.914D+01*RTR)                       
      RB(248) = EXP(+3.321934D+07*TM3-3.671678D+05*TM2+2.442725D+03*TM1         
     &          +2.735875D+01+1.096255D-03*TP1-1.774478D-07*TP2                 
     &          +1.283364D-11*TP3)                                              
      RF(249) =1.D+13 * EXP(-4.97D+01*RTR)                                      
      RB(249) = EXP(+7.844569D+07*TM3-7.458582D+05*TM2+2.029314D+03*TM1         
     &          +1.455306D+01-1.51678D-04*TP1+7.226969D-08*TP2                  
     &          -8.163513D-12*TP3)                                              
      RF(250) =2.34D+07 * EXP( 1.61*ALOGT+3.5D-02*RTR)                          
      RB(250) = EXP(+4.11427D+07*TM3-3.718153D+05*TM2-9.704739D+03*TM1          
     &          +1.560215D+01+8.778876D-04*TP1-7.143242D-08*TP2                 
     &          +1.867147D-12*TP3)                                              
      RF(251) =1.22D+12 * EXP(-1.7D+01*RTR)                                     
      RB(251) = EXP(+7.826523D+07*TM3-7.584068D+05*TM2-8.527814D+02*TM1         
     &          +1.4983D+01-5.883661D-04*TP1+1.699525D-07*TP2                   
     &          -1.571731D-11*TP3)                                              
      RF(252) =2.35D+05 * EXP( 2.5*ALOGT-2.23*RTR)                              
      RB(252) = EXP(+3.889791D+07*TM3-3.564603D+05*TM2-3.005993D+03*TM1         
     &          +1.443496D+01+1.606549D-03*TP1-1.688125D-07*TP2                 
     &          +8.505626D-12*TP3)                                              
      RF(253) =4.55D+06 * EXP( 2.*ALOGT-5.*RTR)                                 
      RB(253) = EXP(+4.975956D+07*TM3-4.683093D+05*TM2-4.600844D+03*TM1         
     &          +1.451763D+01+1.390414D-03*TP1-1.404036D-07*TP2                 
     &          +6.12233D-12*TP3)                                               
      RF(254) =7.55D-01 * EXP( 3.46*ALOGT-5.481*RTR)                            
      RB(254) = EXP(-1.042327D+07*TM3+1.888351D+05*TM2-8.130862D+03*TM1         
     &          +1.454384D+01+1.395264D-03*TP1-1.271703D-07*TP2                 
     &          +5.466015D-12*TP3)                                              
      RF(255) =5.48D+11 * EXP(-5.*RTR)                                          
      RB(255) = EXP(+7.070267D+07*TM3-6.849003D+05*TM2-3.28996D+03*TM1          
     &          +1.33266D+01-1.547834D-04*TP1+8.268086D-08*TP2                  
     &          -9.287884D-12*TP3)                                              
      RF(256) =7.451D+12 * EXP( -1.76*ALOGT-1.715D+01*RTR)                      
      RB(256) = EXP(-5.599442D+07*TM3+4.753975D+05*TM2-1.675549D+03*TM1         
     &          +2.401049D+01+1.43922D-03*TP1-3.397448D-07*TP2                  
     &          +2.970849D-11*TP3)                                              
      RF(257) =1.514D+12 * EXP( -1.78*ALOGT-1.382D+01*RTR)                      
      RB(257) = EXP(-3.300265D+07*TM3+2.131357D+05*TM2-1.735442D+04*TM1         
     &          +2.321518D+01+1.493314D-03*TP1-3.49066D-07*TP2                  
     &          +3.0284D-11*TP3)                                                
      RF(258) =2.443D+15 * EXP(-0.5*ALOGT-2.65D+01*RTR)                         
      RB(258) = EXP(+1.840408D+07*TM3-2.528443D+05*TM2-1.424332D+04*TM1         
     &          +3.115993D+01+4.159597D-04*TP1-7.050637D-08*TP2                 
     &          +5.234178D-12*TP3)                                              
      RF(259) =2.D+12                                                           
      RB(259) = EXP(+3.292294D+07*TM3-2.569091D+05*TM2-1.706536D+04*TM1         
     &          +3.423794D+01-1.097944D-03*TP1+1.64175D-07*TP2                  
     &          -1.160697D-11*TP3)                                              
      RF(260) =1.D+12 * EXP(-1.167D+01*RTR)                                     
      RB(260) = EXP(+4.062194D+07*TM3-3.744504D+05*TM2-2.553496D+03*TM1         
     &          +2.532041D+01-4.224309D-04*TP1+1.187327D-07*TP2                 
     &          -1.102922D-11*TP3)                                              
      RF(261) =1.597D+23 * EXP( -4.5*ALOGT)                                     
      RB(261) = EXP(-1.662602D+07*TM3+2.448529D+04*TM2+1.41189D+03*TM1          
     &          +1.865636D+01-1.98196D-03*TP1+2.841053D-07*TP2                  
     &          -2.054158D-11*TP3)                                              
      RF(262) =6.844D+22 * EXP( -4.5*ALOGT)                                     
      RB(262) = EXP(-1.803319D+07*TM3+4.795121D+04*TM2-4.99238D+04*TM1          
     &          +1.857213D+01-2.047133D-03*TP1+3.140589D-07*TP2                 
     &          -2.324411D-11*TP3)                                              
      RF(263) =2.106D+22 * EXP( -2.12*ALOGT-4.383D+01*RTR)                      
      RB(263) = EXP(-2.962453D+07*TM3+1.286617D+05*TM2-5.120904D+01*TM1         
     &          +3.038145D+01+2.992608D-04*TP1-9.917085D-08*TP2                 
     &          +9.298916D-12*TP3)                                              
      RF(264) =9.722D+15 * EXP( -1.1*ALOGT-2.064D+01*RTR)                       
      RB(264) = EXP(-5.36339D+06*TM3+4.981964D+04*TM2-5.073526D+03*TM1          
     &          +2.364088D+01+8.224336D-04*TP1-1.400192D-07*TP2                 
     &          +1.064427D-11*TP3)                                              
      RF(265) =5.D+10 * EXP(-5.D-01*RTR)                                        
      RB(265) = EXP(+8.28601D+06*TM3-6.669823D+04*TM2-2.363767D+04*TM1          
     &          +2.290481D+01-1.985057D-05*TP1+1.008052D-08*TP2                 
     &          -8.001533D-13*TP3)                                              
      RF(266) =6.D+10 * EXP(-2.15D+01*RTR)                                      
      RB(266) = EXP(+4.486938D+07*TM3-4.273801D+05*TM2-4.113273D+03*TM1         
     &          +2.180322D+01-4.012649D-04*TP1+1.174795D-07*TP2                 
     &          -1.098655D-11*TP3)                                              
      RF(267) =1.5D+13 * EXP(-2.05D+01*RTR)                                     
      RB(267) = EXP(-1.070028D+08*TM3+9.266098D+05*TM2-2.471592D+04*TM1         
     &          +2.214102D+01+2.892064D-03*TP1-4.737627D-07*TP2                 
     &          +3.582438D-11*TP3)                                              
      RF(268) =7.D+11                                                           
      RB(268) = EXP(+2.874174D+07*TM3-2.246941D+05*TM2-1.715005D+04*TM1         
     &          +3.327742D+01-1.134223D-03*TP1+1.650056D-07*TP2                 
     &          -1.126501D-11*TP3)                                              
      RF(269) =4.D+10 * EXP(-1.85D+01*RTR)                                      
      RB(269) = EXP(-2.89838D+07*TM3+1.905688D+05*TM2-3.087445D+04*TM1          
     &          +1.817552D+01+9.638749D-04*TP1-1.272432D-07*TP2                 
     &          +8.633254D-12*TP3)                                              
      RF(270) =3.D+16 * EXP(-4.D+01*RTR)                                        
      RB(270) = EXP(-5.889109D+07*TM3+4.817496D+05*TM2+3.630517D+02*TM1         
     &          +3.278453D+01+1.202317D-03*TP1-1.952563D-07*TP2                 
     &          +1.460051D-11*TP3)                                              
      RF(271) =1.D+11 * EXP(-1.4D+01*RTR)                                       
      RB(271) = EXP(-4.356922D+06*TM3+8.700222D+03*TM2-1.051306D+04*TM1         
     &          +2.42196D+01+5.043152D-04*TP1-8.934707D-08*TP2                  
     &          +7.118317D-12*TP3)                                              
      RF(272) =2.177D+16 * EXP( -2.69*ALOGT-1.72D+01*RTR)                       
      RB(272) = EXP(+1.729548D+07*TM3-2.499834D+05*TM2-6.41769D+02*TM1          
     &          +1.384052D+01+1.276697D-04*TP1-7.181691D-08*TP2                 
     &          +6.769581D-12*TP3)                                              
      RF(273) =5.311D+15 * EXP( -2.61*ALOGT-2.081D+01*RTR)                      
      RB(273) = EXP(+5.729952D+07*TM3-5.90084D+05*TM2-1.582239D+04*TM1          
     &          +1.325467D+01+2.499621D-04*TP1-8.078312D-08*TP2                 
     &          +6.978487D-12*TP3)                                              
      RF(274) =1.D+14 * EXP(-1.49D+01*RTR)                                      
      RB(274) = EXP(+3.269735D+07*TM3-2.958945D+05*TM2-4.195381D+03*TM1         
     &          +3.126332D+01+5.00541D-05*TP1+5.053169D-08*TP2                  
     &          -5.686355D-12*TP3)                                              
      RF(275) =4.5D+15 * EXP( -1.11*ALOGT)                                      
      RB(275) = EXP(+1.264213D+07*TM3-9.400878D+04*TM2-1.168812D+04*TM1         
     &          +3.415261D+01-1.792426D-03*TP1+2.517612D-07*TP2                 
     &          -1.745181D-11*TP3)                                              
      RF(276) =2.3D+13 * EXP(-5.D+01*RTR)                                       
      RB(276) = EXP(-7.432888D+06*TM3-6.755854D+04*TM2-2.162298D+04*TM1         
     &          +2.302653D+01+1.960135D-03*TP1-3.307342D-07*TP2                 
     &          +2.475947D-11*TP3)                                              
      RF(277) =1.5D+16 * EXP(-5.7D+01*RTR)                                      
      RB(277) = EXP(+2.655373D+07*TM3-3.443885D+05*TM2-2.940309D+04*TM1         
     &          +3.428357D+01+1.182595D-03*TP1-1.852556D-07*TP2                 
     &          +1.282066D-11*TP3)                                              
      RF(278) =4.593D+18 * EXP(-0.46*ALOGT-1.083D+02*RTR)                       
      RB(278) = EXP(+8.448352D+06*TM3-2.082151D+05*TM2+1.64708D+03*TM1          
     &          +2.944426D+01+1.232842D-03*TP1-1.938349D-07*TP2                 
     &          +1.386178D-11*TP3)                                              
      RF(279) =2.62D+06 * EXP( 2.06*ALOGT-9.16D-01*RTR)                         
      RB(279) = EXP(-1.639289D+07*TM3+1.245437D+05*TM2-1.079802D+04*TM1         
     &          +2.853795D+01+2.158458D-03*TP1-3.287504D-07*TP2                 
     &          +2.363791D-11*TP3)                                              
      RF(280) =1.85D+07 * EXP( 1.51*ALOGT+9.62D-01*RTR)                         
      RB(280) = EXP(-2.859123D+07*TM3+1.61985D+05*TM2+2.801779D+03*TM1          
     &          +1.964071D+01+2.87747D-03*TP1-4.616827D-07*TP2                  
     &          +3.404902D-11*TP3)                                              
      RF(281) =4.24D+06 * EXP( 2.1*ALOGT-4.868*RTR)                             
      RB(281) = EXP(-2.871782D+06*TM3-2.515577D+04*TM2-4.866323D+03*TM1         
     &          +2.710448D+01+2.458357D-03*TP1-3.673693D-07*TP2                 
     &          +2.573989D-11*TP3)                                              
      RF(282) =6.03D+13 * EXP(-0.35*ALOGT-2.988*RTR)                            
      RB(282) = EXP(+1.155296D+07*TM3-2.765441D+05*TM2+1.026979D+04*TM1         
     &          +1.932552D+01+2.023108D-03*TP1-3.35532D-07*TP2                  
     &          +2.446217D-11*TP3)                                              
      RF(283) =3.9D-07 * EXP( 5.8*ALOGT-2.2*RTR)                                
      RB(283) = EXP(-1.143468D+08*TM3+1.093553D+06*TM2+3.588568D+03*TM1         
     &          +2.154638D+01+4.877161D-03*TP1-7.290195D-07*TP2                 
     &          +5.26588D-11*TP3)                                               
      RF(284) =1.D+12 * EXP(-1.192D+01*RTR)                                     
      RB(284) = EXP(+7.130093D+06*TM3-2.09405D+05*TM2+1.366279D+04*TM1          
     &          +1.97628D+01+1.471967D-03*TP1-2.289699D-07*TP2                  
     &          +1.707976D-11*TP3)                                              
      RF(285) =1.77D+18 * EXP( -1.9*ALOGT-2.975*RTR)                            
      RB(285) = EXP(+2.941622D+07*TM3-4.76327D+05*TM2+1.213379D+04*TM1          
     &          +1.80382D+01+9.938548D-04*TP1-1.861631D-07*TP2                  
     &          +1.423383D-11*TP3)                                              
      END IF
      RF(9) =1.475D+12 * EXP( 0.6*ALOGT)                                        
      RB(9) = EXP(-1.865118D+07*TM3+2.225834D+05*TM2-2.543917D+04*TM1           
     &        +3.277476D+01+3.701016D-04*TP1-1.060237D-07*TP2                   
     &        +9.527961D-12*TP3)                                                
      RF(16) =2.951D+14 * EXP(-4.843D+01*RTR)                                   
      RB(16) = EXP(-6.452943D+05*TM3-8.687829D+04*TM2+1.338576D+03*TM1          
     &         +2.665109D+01+1.114652D-03*TP1-1.567469D-07*TP2                  
     &         +1.059717D-11*TP3)                                               
      RF(22) =1.8D+10 * EXP(-2.384*RTR)                                         
      RB(22) = EXP(+5.143714D+06*TM3+1.968322D+04*TM2-6.526719D+04*TM1          
     &         +3.093159D+01-8.080807D-04*TP1+1.023575D-07*TP2                  
     &         -6.668862D-12*TP3)                                               
      RF(48) =2.277D+15 * EXP(-0.69*ALOGT-1.7486D-01*RTR)                       
      RB(48) = EXP(-1.767526D+06*TM3+1.600923D+05*TM2-4.609208D+04*TM1          
     &         +4.13805D+01-1.896034D-03*TP1+2.56241D-07*TP2                    
     &         -1.806081D-11*TP3)                                               
      RF(49) =1.27D+16 * EXP(-0.63*ALOGT-3.83D-01*RTR)                          
      RB(49) = EXP(-4.180317D+07*TM3+4.443237D+05*TM2-5.425403D+04*TM1          
     &         +3.897045D+01-9.321599D-04*TP1+1.012571D-07*TP2                  
     &         -5.695462D-12*TP3)                                               
      RF(77) =2.79D+18 * EXP( -1.43*ALOGT-1.33*RTR)                             
      RB(77) = EXP(-7.560478D+05*TM3+1.131213D+05*TM2-4.712073D+04*TM1          
     &         +4.062552D+01-1.985626D-03*TP1+2.721151D-07*TP2                  
     &         -1.857826D-11*TP3)                                               
      RF(78) =1.055D+12 * EXP( 0.5*ALOGT-8.6D-02*RTR)                           
      RB(78) = EXP(-5.244205D+07*TM3+5.785688D+05*TM2-5.030298D+04*TM1          
     &         +3.692211D+01+1.788787D-05*TP1-7.550567D-08*TP2                  
     &         +8.403332D-12*TP3)                                               
      RF(79) =2.43D+12 * EXP( 0.515*ALOGT-5.D-02*RTR)                           
      RB(79) = EXP(-2.520317D+07*TM3+2.706201D+05*TM2-5.320871D+04*TM1          
     &         +3.435224D+01+3.153582D-04*TP1-8.824126D-08*TP2                  
     &         +7.880669D-12*TP3)                                               
      RF(98) =4.82D+17 * EXP( -1.16*ALOGT-1.145*RTR)                            
      RB(98) = EXP(+6.280785D+06*TM3+6.894448D+04*TM2-4.753984D+04*TM1          
     &         +4.076862D+01-2.107441D-03*TP1+2.867431D-07*TP2                  
     &         -1.934525D-11*TP3)                                               
      RF(105) =5.21D+17 * EXP(-0.99*ALOGT-1.58*RTR)                             
      RB(105) = EXP(-9.472891D+06*TM3+1.264641D+05*TM2-5.138351D+04*TM1         
     &          +4.02743D+01-9.558626D-04*TP1+9.139707D-08*TP2                  
     &          -5.391093D-12*TP3)                                              
      RF(112) =8.D+12 * EXP( 0.44*ALOGT-8.877D+01*RTR)                          
      RB(112) = EXP(+4.364246D+07*TM3-5.466437D+05*TM2-2.165223D+04*TM1         
     &          +2.661049D+01+1.382148D-03*TP1-1.912869D-07*TP2                 
     &          +1.193991D-11*TP3)                                              
      RF(113) =1.08D+12 * EXP( 0.454*ALOGT-1.82*RTR)                            
      RB(113) = EXP(-1.861982D+07*TM3+2.097133D+05*TM2-1.978906D+04*TM1         
     &          +3.0977D+01+1.97929D-04*TP1-7.868806D-08*TP2                    
     &          +7.822502D-12*TP3)                                              
      RF(114) =6.08D+12 * EXP( 0.27*ALOGT-2.8D-01*RTR)                          
      RB(114) = EXP(-3.321911D+07*TM3+3.859906D+05*TM2-5.738947D+04*TM1         
     &          +3.77426D+01-2.783177D-04*TP1+1.086302D-09*TP2                  
     &          +1.612079D-12*TP3)                                              
      RF(130) =5.6D+12 * EXP(-2.4*RTR)                                          
      RB(130) = EXP(-3.12777D+07*TM3+3.734761D+05*TM2-2.001335D+04*TM1          
     &          +3.014291D+01-3.398228D-04*TP1+3.540604D-08*TP2                 
     &          -1.365491D-12*TP3)                                              
      RF(146) =1.D+17 * EXP( -1.*ALOGT)                                         
      RB(146) = EXP(+1.450799D+07*TM3-8.077666D+04*TM2-6.626901D+04*TM1         
     &          +3.721194D+01-8.428656D-04*TP1+9.601114D-08*TP2                 
     &          -7.090243D-12*TP3)                                              
      RF(150) =2.5D+16 * EXP(-0.8*ALOGT)                                        
      RB(150) = EXP(-1.206755D+07*TM3+1.434066D+05*TM2-5.585039D+04*TM1         
     &          +3.63036D+01-7.925267D-04*TP1+6.411239D-08*TP2                  
     &          -2.500474D-12*TP3)                                              
      RF(156) =8.1D+11 * EXP( 0.5*ALOGT-4.51*RTR)                               
      RB(156) = EXP(+4.10028D+06*TM3+5.444135D+04*TM2-4.232713D+04*TM1          
     &          +3.921152D+01-1.129586D-03*TP1+1.564583D-07*TP2                 
     &          -1.080388D-11*TP3)                                              
      RF(170) =3.D+12 * EXP(-1.6722D+01*RTR)                                    
      RB(170) = EXP(-1.676241D+07*TM3+3.404621D+04*TM2-2.780972D+03*TM1         
     &          +2.356113D+01+1.109982D-03*TP1-1.914599D-07*TP2                 
     &          +1.464127D-11*TP3)                                              

      RETURN
      END

      SUBROUTINE RATEL( RF, T )

!*****double precision
        IMPLICIT DOUBLE PRECISION (A-H, O-Z), INTEGER (I-N)
!*****END double precision
!*****single precision
!       IMPLICIT REAL (A-H, O-Z), INTEGER (I-N)
!*****END single precision

      DIMENSION RF(*)


! RATE CONSTANTS FOR FALL_OFF LOW PRESSURE LIMIT
      RUC = 1.987215583D0
      ALOGT = DLOG(T)
      RTR = 1.0D3/(RUC*T)
      RF(1) =6.366D+20 * EXP( -1.72*ALOGT-5.248D-01*RTR)                        
      RF(2) =1.202D+17 * EXP(-4.55D+01*RTR)                                     
      RF(3) =1.55D+24 * EXP( -2.79*ALOGT-4.191*RTR)                             
      RF(4) =8.054D+31 * EXP( -3.75*ALOGT-9.816D-01*RTR)                        
      RF(5) =2.477D+33 * EXP( -4.76*ALOGT-2.44*RTR)                             
      RF(6) =4.D+36 * EXP( -5.92*ALOGT-3.14*RTR)                                
      RF(7) =4.36D+31 * EXP( -4.65*ALOGT-5.08*RTR)                              
      RF(8) =4.66D+41 * EXP( -7.44*ALOGT-1.408D+01*RTR)                         
      RF(9) =1.88D+38 * EXP( -6.36*ALOGT-5.04*RTR)                              
      RF(10) =1.99D+41 * EXP( -7.08*ALOGT-6.685*RTR)                            
      RF(11) =7.D+50 * EXP( -9.31*ALOGT-9.986D+01*RTR)                          
      RF(12) =1.2D+42 * EXP( -7.62*ALOGT-6.97*RTR)                              
      RF(13) =1.4D+30 * EXP( -3.86*ALOGT-3.32*RTR)                              
      RF(14) =3.8D+40 * EXP( -7.27*ALOGT-7.22*RTR)                              
      RF(15) =3.75D+33 * EXP( -4.8*ALOGT-1.9*RTR)                               
      RF(16) =3.2D+27 * EXP( -3.14*ALOGT-1.23*RTR)                              
      RF(17) =2.69D+33 * EXP( -5.11*ALOGT-7.095*RTR)                            
      RF(18) =1.2D+15 * EXP(-1.2518D+01*RTR)                                    

      RETURN
      END

      SUBROUTINE STEADYE( ABV, DEN, RF, RB, XM, ADJ, SMALL, ATOL, RTOL,
     &  CONV, LBOUND, N, NITER, XH, XH2, XCH2, XCH2S, XCH3, XO, XCH4,           
     &  XOH, XH2O, XC2H, XC2H2, XC2H3, XCO, XC2H4, XHCO, XC2H5, XCH2O,          
     &  XC2H6, XCH2OH, XCH3O, XO2, XCH3OH, XHO2, XH2O2, XHCCO, XCH2CO,          
     &  XHCCOH, XCH2HCO, XCH3CO, XCO2, XCH3HCO, XOCHO, XCH3CHOH,                
     &  XC2H4OH, XCH3CH2O, XCH3OCH2, XHCOOH, XCH3OCH3, XC2H5OH, XHOCH2O,        
     &  XCH3OCO, XCH3OCHO, XCH3OCH2O, XCH3OCH2OH, XOCH2OCHO, XHOCH2OCO,         
     &  XHOC2H4O2, XCH3OCH2O2, XCH2OCH2O2H, XCH3OCH2O2H, XHO2CH2OCHO,           
     &  XO2CH2OCH2O2H, XN2 )                                                    

!*****double precision
        IMPLICIT DOUBLE PRECISION (A-H, O-Z), INTEGER (I-N)
!*****END double precision
!*****single precision
!       IMPLICIT REAL (A-H, O-Z), INTEGER (I-N)
!*****END single precision

      DIMENSION ABV(*), DEN(*), RF(*), RB(*), XM(*)
      LOGICAL LBOUND(*), CONV
!  Coupling Threshold = 1.000E-02
      DIMENSION INDXX(5), VV(5), B(5)                                   
      DIMENSION A5(5,5)                                                 

      IF ( N .EQ. 1) THEN

!     STEADY-STATE EXPRESSION FOR OCH2OCHO        

      ABV(1) = +RF(270)*XHO2CH2OCHO+RB(271)*XHOCH2OCO                           
      DEN(1) = +RB(270)*XOH+RF(271)                                             
      IF(DEN(1).LT.1.0)DEN(1)=MAX(ADJ*ABV(1),DEN(1),SMALL)                      
      VOLD = XOCH2OCHO                                                          
      XOCH2OCHO = ABV(1)/DEN(1)                                                 
      DIFF = ABS( XOCH2OCHO-VOLD)-MAX(XOCH2OCHO*RTOL,ATOL)                      
      IF(DIFF .GT. 0.) CONV=.FALSE.

!     STEADY-STATE EXPRESSION FOR HCCOH           

      ABV(2) = +RF(135)*XOH*XC2H2                                               
      DEN(2) = +RB(135)*XH                                                      
      IF(DEN(2).LT.1.0)DEN(2)=MAX(ADJ*ABV(2),DEN(2),SMALL)                      
      VOLD = XHCCOH                                                             
      XHCCOH = ABV(2)/DEN(2)                                                    
      DIFF = ABS( XHCCOH-VOLD)-MAX(XHCCOH*RTOL,ATOL)                            
      IF(DIFF .GT. 0.) CONV=.FALSE.

!     STEADY-STATE EXPRESSION FOR HOCH2O          

      ABV(3) = +RF(272)*XHOCH2OCO+RB(274)*XH*XHCOOH+RF(275)*XOH*XCH2O           
      DEN(3) = +RB(272)*XCO+RF(274)+RB(275)                                     
      IF(DEN(3).LT.1.0)DEN(3)=MAX(ADJ*ABV(3),DEN(3),SMALL)                      
      VOLD = XHOCH2O                                                            
      XHOCH2O = ABV(3)/DEN(3)                                                   
      DIFF = ABS( XHOCH2O-VOLD)-MAX(XHOCH2O*RTOL,ATOL)                          
      IF(DIFF .GT. 0.) CONV=.FALSE.

!     STEADY-STATE EXPRESSION FOR OCHO            

      ABV(4) = +RF(248)*XCH3OCHO+RB(258)*XH*XCO2*XM(258)                        
      DEN(4) = +RB(248)*XCH3+RF(258)*XM(258)                                    
      IF(DEN(4).LT.1.0)DEN(4)=MAX(ADJ*ABV(4),DEN(4),SMALL)                      
      VOLD = XOCHO                                                              
      XOCHO = ABV(4)/DEN(4)                                                     
      DIFF = ABS( XOCHO-VOLD)-MAX(XOCHO*RTOL,ATOL)                              
      IF(DIFF .GT. 0.) CONV=.FALSE.
      DEN(5) = +RB(132)*XOH+RB(136)*XH2O+RF(146)*XH+RF(147)*XOH+RF(148)         
     &         *XO2+RF(149)*XH2                                                 
      DEN(10) = +RF(92)*XCH4+RB(94)*XH2O+RF(96)*XCH3+RB(97)*XH2O+RF(98)         
     &          *XH2O+RB(139)*XCO+RF(158)*XM(158)+RF(159)*XH2O+RF(160)          
     &          *XCO+RF(161)*XCO2+RF(162)*XO+RF(163)*XO+RF(164)*XOH             
     &          +RF(165)*XH2+RF(166)*XO2+RF(167)*XO2+RF(168)*XCO2               
      DEN(12) = +RB(249)*XHO2+RB(250)*XH2O+RB(251)*XH2O2+RB(252)*XOH            
     &          +RB(253)*XH2+RB(254)*XCH4+RB(255)*XCH3OH+RF(256)+RF(257)        
      DEN(13) = +RF(170)+RB(171)*XH2O+RB(173)*XOH+RB(175)*XH2+RB(177)           
     &          *XCH4+RB(179)*XH2O2+RB(181)*XHO2                                
      DEN(14) = +RB(266)+RF(267)+RF(268)*XO2                                    
      DEN(15) = +RB(268)+RF(269)                                                
      DEN(16) = +RB(200)*XH2O+RB(203)*XH2+RB(206)*XOH+RB(209)*XCH4              
     &          +RB(213)*XH2O2+RF(230)*XO2+RB(232)                              
      DEN(17) = +RB(230)+RF(231)                                                
      DEN(18) = +RB(202)*XH2O+RB(205)*XH2+RB(208)*XOH+RB(211)*XCH4              
     &          +RB(214)*XH2O2+RF(215)*XM(215)+RF(216)*XM(216)+RF(217)          
     &          *XO2+RF(218)*XCO+RF(219)*XH+RF(220)*XH+RF(221)*XOH              
     &          +RB(233)*XOH                                                    
      DEN(19) = +RF(198)+RF(199)+RF(200)*XOH+RF(201)*XOH+RF(202)*XOH            
     &          +RF(203)*XH+RF(204)*XH+RF(205)*XH+RF(206)*XO+RF(207)*XO         
     &          +RF(208)*XO+RF(209)*XCH3+RF(210)*XCH3+RF(211)*XCH3              
     &          +RF(212)*XHO2+RF(213)*XHO2+RF(214)*XHO2                         
      DEN(20) = +RB(201)*XH2O+RB(204)*XH2+RB(207)*XOH+RB(210)*XCH4              
     &          +RB(212)*XH2O2+RF(222)*XO2+RF(223)*XO2+RF(224)*XO               
     &          +RF(225)*XH+RF(226)*XH+RF(227)*XHO2+RF(228)*XOH+RF(229)         
     &          *XM(229)                                                        
      DEN(22) = +RB(123)*XH+RB(134)*XH+RB(138)*XOH+RB(156)+RF(182)*XO           
     &          +RF(183)*XH+RF(184)*XH+RF(185)*XO+RF(186)*XOH+RF(187)           
     &          *XOH+RB(189)*XH2+RB(191)*XH2O+RB(197)*XH                        
      DEN(23) = +RB(129)*XO+RB(172)*XH2O+RB(174)*XOH+RB(176)*XH2+RB(178)        
     &          *XCH4+RB(180)*XH2O2+RF(188)*XH+RF(189)*XH+RF(190)*XO            
     &          +RF(191)*XOH+RF(192)*XO2+RF(193)*XCH3+RF(194)*XHO2              
     &          +RF(195)*XHO2+RF(196)+RF(197)                                   
      DEN(25) = +RB(111)*XH+RF(169)+RF(171)*XOH+RF(172)*XOH+RF(173)*XO          
     &          +RF(174)*XO+RF(175)*XH+RF(176)*XH+RF(177)*XCH3+RF(178)          
     &          *XCH3+RF(179)*XHO2+RF(180)*XHO2+RF(181)*XO2+RB(195)*XO2         
     &          +RB(215)*XH*XM(215)+RB(217)*XHO2+RB(221)*XH2O+RB(222)           
     &          *XHO2+RB(223)*XHO2+RB(224)*XOH+RB(227)*XOH*XOH+RB(228)          
     &          *XH2O+RB(229)*XH*XM(229)                                        

      END IF

!     STEADY-STATE EXPRESSION FOR C2H             

      ABV(5) = +RF(132)*XO*XC2H2+RF(136)*XOH*XC2H2+RB(146)*XC2H2+RB(147)        
     &         *XH*XHCCO+RB(148)*XCO*XHCO+RB(149)*XH*XC2H2                      
      IF(DEN(5).LT.1.0)DEN(5)=MAX(ADJ*ABV(5),DEN(5),SMALL)                      
      VOLD = XC2H                                                               
      XC2H = ABV(5)/DEN(5)                                                      
      DIFF = ABS( XC2H-VOLD)-MAX(XC2H*RTOL,ATOL)                                
      IF(DIFF .GT. 0.) CONV=.FALSE.

!     STEADY-STATE EXPRESSION FOR C2H3            

      ABV(6) = +RB(114)*XC2H4+RF(115)*XH*XC2H4+RF(116)*XOH*XC2H4+RF(117)        
     &         *XCH3*XC2H4+RB(119)*XH2O*XC2H2+RF(120)*XO*XC2H4+RF(121)          
     &         *XC2H4*XO2+RB(122)*XH2*XC2H2+RB(123)*XH*XCH2CO+RB(124)           
     &         *XC2H4*XHO2+RB(125)*XCH4*XC2H2+2.00*RB(126)*XC2H2*XC2H4          
     &         +RB(127)*XHCO*XCH2O+RB(128)*XC2H2*XHO2+RB(129)*XO*XCH2HCO        
     &         +RF(130)*XH*XC2H2+RF(143)*XCH2*XHCCO                             
      DEN(6) = +RF(114)*XH+RB(115)*XH2+RB(116)*XH2O+RB(117)*XCH4+RF(119)        
     &         *XOH+RB(120)*XOH+RB(121)*XHO2+RF(122)*XH+RF(123)*XO              
     &         +RF(124)*XH2O2+RF(125)*XCH3+2.00*RF(126)*XC2H3+RF(127)           
     &         *XO2+RF(128)*XO2+RF(129)*XO2+RB(130)+RB(143)*XCO                 
      IF(DEN(6).LT.1.0)DEN(6)=MAX(ADJ*ABV(6),DEN(6),SMALL)                      
      VOLD = XC2H3                                                              
      XC2H3 = ABV(6)/DEN(6)                                                     
      DIFF = ABS( XC2H3-VOLD)-MAX(XC2H3*RTOL,ATOL)                              
      IF(DIFF .GT. 0.) CONV=.FALSE.

!     STEADY-STATE EXPRESSION FOR CH3OCH2         

      ABV(7) = +RF(235)*XOH*XCH3OCH3+RF(236)*XH*XCH3OCH3+RF(237)*XCH3           
     &         *XCH3OCH3+RF(238)*XO*XCH3OCH3+RF(239)*XHO2*XCH3OCH3              
     &         +RF(240)*XO2*XCH3OCH3+RF(241)*XCH3O*XCH3OCH3+RF(242)             
     &         *XCH3OCH3*XCH3OCH2O2+RB(243)*XCH3*XCH2O+RB(244)*XCH2O            
     &         *XCH3OCH3+RB(245)*XHCO*XCH3OCH3+RB(246)*XOH*XCH3OCH2O            
     &         +RB(259)*XCH3OCH2O2                                              
      DEN(7) = +RB(235)*XH2O+RB(236)*XH2+RB(237)*XCH4+RB(238)*XOH               
     &         +RB(239)*XH2O2+RB(240)*XHO2+RB(241)*XCH3OH+RB(242)               
     &         *XCH3OCH2O2H+RF(243)+RF(244)*XCH3O+RF(245)*XCH2O+RF(246)         
     &         *XHO2+RF(259)*XO2                                                
      IF(DEN(7).LT.1.0)DEN(7)=MAX(ADJ*ABV(7),DEN(7),SMALL)                      
      VOLD = XCH3OCH2                                                           
      XCH3OCH2 = ABV(7)/DEN(7)                                                  
      DIFF = ABS( XCH3OCH2-VOLD)-MAX(XCH3OCH2*RTOL,ATOL)                        
      IF(DIFF .GT. 0.) CONV=.FALSE.

!     STEADY-STATE EXPRESSION FOR CH3O            

      ABV(8) = +RF(45)*XCH3*XO2+RF(47)*XCH3*XHO2+RB(66)*XCH2O*XCH3OH            
     &         +RB(67)*XH*XCH2O*XM(67)+RB(68)*XCH3*XOH+RB(69)*XOH*XCH2O         
     &         +RB(70)*XH2O*XCH2O+RB(71)*XCH2O*XHO2+RB(72)*XCH2O*XHO2           
     &         +RB(73)*XCH2O*XH2O2+RB(74)*XCH3*XCO2+RB(75)*XCO*XCH3OH           
     &         +2.00*RB(76)*XCH2O*XCH3OH+RB(79)*XCH3OH+RF(81)*XH*XCH3OH         
     &         +RF(83)*XOH*XCH3OH+RB(89)*XCH2OH*XCH3OH+RB(97)*XCH2S*XH2O        
     &         +RF(234)*XCH3OCH3+RB(241)*XCH3OH*XCH3OCH2+RB(244)*XCH2O          
     &         *XCH3OCH3+RB(255)*XCH3OH*XCH3OCO+RF(256)*XCH3OCO+RF(264)         
     &         *XCH3OCH2O                                                       
      DEN(8) = +RB(45)*XO+RB(47)*XOH+RF(66)*XCH2OH+RF(67)*XM(67)+RF(68)         
     &         *XH+RF(69)*XO+RF(70)*XOH+RF(71)*XO2+RF(72)*XO2+RF(73)            
     &         *XHO2+RF(74)*XCO+RF(75)*XHCO+2.00*RF(76)*XCH3O+RF(79)*XH         
     &         +RB(81)*XH2+RB(83)*XH2O+RF(89)*XCH3OH+RF(97)*XH+RB(234)          
     &         *XCH3+RF(241)*XCH3OCH3+RF(244)*XCH3OCH2+RF(255)*XCH3OCHO         
     &         +RB(256)*XCO+RB(264)*XCH2O                                       
      IF(DEN(8).LT.1.0)DEN(8)=MAX(ADJ*ABV(8),DEN(8),SMALL)                      
      VOLD = XCH3O                                                              
      XCH3O = ABV(8)/DEN(8)                                                     
      DIFF = ABS( XCH3O-VOLD)-MAX(XCH3O*RTOL,ATOL)                              
      IF(DIFF .GT. 0.) CONV=.FALSE.

!     STEADY-STATE EXPRESSION FOR CH2OH           

      ABV(9) = +RB(55)*XH*XCH2O*XM(55)+RB(56)*XH2*XCH2O+RB(57)*XCH3*XOH         
     &         +RB(58)*XOH*XCH2O+RB(59)*XH2O*XCH2O+RB(60)*XCH2O*XHO2            
     &         +RB(61)*XCH2O*XHO2+RB(62)*XCH2O*XH2O2+RB(63)*XCO*XCH3OH          
     &         +RB(64)*XCH2O*XCH2O+2.00*RB(65)*XCH2O*XCH3OH+RB(66)*XCH2O        
     &         *XCH3OH+RB(78)*XCH3OH+RF(80)*XH*XCH3OH+RF(82)*XO*XCH3OH          
     &         +RF(84)*XOH*XCH3OH+RF(85)*XO2*XCH3OH+RF(86)*XHCO*XCH3OH          
     &         +RF(87)*XCH3OH*XHO2+RF(88)*XCH3*XCH3OH+RF(89)*XCH3O              
     &         *XCH3OH+RF(187)*XOH*XCH2CO+RF(198)*XC2H5OH+RF(219)*XH            
     &         *XCH3CH2O+RF(226)*XH*XCH3CHOH+RF(273)*XHOCH2OCO                  
      DEN(9) = +RF(55)*XM(55)+RF(56)*XH+RF(57)*XH+RF(58)*XO+RF(59)*XOH          
     &         +RF(60)*XO2+RF(61)*XO2+RF(62)*XHO2+RF(63)*XHCO+RF(64)            
     &         *XHCO+2.00*RF(65)*XCH2OH+RF(66)*XCH3O+RF(78)*XH+RB(80)           
     &         *XH2+RB(82)*XOH+RB(84)*XH2O+RB(85)*XHO2+RB(86)*XCH2O             
     &         +RB(87)*XH2O2+RB(88)*XCH4+RB(89)*XCH3OH+RB(187)*XCO              
     &         +RB(198)*XCH3+RB(219)*XCH3+RB(226)*XCH3+RB(273)*XCO2             
      IF(DEN(9).LT.1.0)DEN(9)=MAX(ADJ*ABV(9),DEN(9),SMALL)                      
      VOLD = XCH2OH                                                             
      XCH2OH = ABV(9)/DEN(9)                                                    
      DIFF = ABS( XCH2OH-VOLD)-MAX(XCH2OH*RTOL,ATOL)                            
      IF(DIFF .GT. 0.) CONV=.FALSE.

!     STEADY-STATE EXPRESSION FOR CH2S            

      ABV(10) = +RB(92)*XCH3*XCH3+RF(94)*XCH3*XOH+RB(96)*XH*XC2H4+RF(97)        
     &          *XH*XCH3O+RB(98)*XCH3OH+RF(139)*XH*XHCCO+RB(158)*XCH2           
     &          *XM(158)+RB(159)*XCH2*XH2O+RB(160)*XCH2*XCO+RB(161)*XCH2        
     &          *XCO2+RB(162)*XH2*XCO+RB(163)*XH*XHCO+RB(164)*XH*XCH2O          
     &          +RB(165)*XH*XCH3+RB(166)*XH*XOH*XCO+RB(167)*XH2O*XCO            
     &          +RB(168)*XCO*XCH2O                                              
      IF(DEN(10).LT.1.0)DEN(10)=MAX(ADJ*ABV(10),DEN(10),SMALL)                  
      VOLD = XCH2S                                                              
      XCH2S = ABV(10)/DEN(10)                                                   
      DIFF = ABS( XCH2S-VOLD)-MAX(XCH2S*RTOL,ATOL)                              
      IF(DIFF .GT. 0.) CONV=.FALSE.

!     STEADY-STATE EXPRESSION FOR CH3OCH2O        

      ABV(11) = +RF(246)*XHO2*XCH3OCH2+RB(247)*XH*XCH3OCHO+2.00*RF(261)         
     &          *XCH3OCH2O2*XCH3OCH2O2+RF(263)*XCH3OCH2O2H+RB(264)*XCH2O        
     &          *XCH3O+RB(265)*XHO2*XCH3OCHO                                    
      DEN(11) = +RB(246)*XOH+RF(247)+2.00*RB(261)*XO2*XCH3OCH2O+RB(263)         
     &          *XOH+RF(264)+RF(265)*XO2                                        
      IF(DEN(11).LT.1.0)DEN(11)=MAX(ADJ*ABV(11),DEN(11),SMALL)                  
      VOLD = XCH3OCH2O                                                          
      XCH3OCH2O = ABV(11)/DEN(11)                                               
      DIFF = ABS( XCH3OCH2O-VOLD)-MAX(XCH3OCH2O*RTOL,ATOL)                      
      IF(DIFF .GT. 0.) CONV=.FALSE.

!     STEADY-STATE EXPRESSION FOR CH3OCO          

      ABV(12) = +RF(249)*XO2*XCH3OCHO+RF(250)*XOH*XCH3OCHO+RF(251)*XHO2         
     &          *XCH3OCHO+RF(252)*XO*XCH3OCHO+RF(253)*XH*XCH3OCHO               
     &          +RF(254)*XCH3*XCH3OCHO+RF(255)*XCH3O*XCH3OCHO+RB(256)           
     &          *XCO*XCH3O+RB(257)*XCH3*XCO2                                    
      IF(DEN(12).LT.1.0)DEN(12)=MAX(ADJ*ABV(12),DEN(12),SMALL)                  
      VOLD = XCH3OCO                                                            
      XCH3OCO = ABV(12)/DEN(12)                                                 
      DIFF = ABS( XCH3OCO-VOLD)-MAX(XCH3OCO*RTOL,ATOL)                          
      IF(DIFF .GT. 0.) CONV=.FALSE.

!     STEADY-STATE EXPRESSION FOR CH3CO           

      ABV(13) = +RB(170)*XCH3*XCO+RF(171)*XOH*XCH3HCO+RF(173)*XO*XCH3HCO        
     &          +RF(175)*XH*XCH3HCO+RF(177)*XCH3*XCH3HCO+RF(179)*XHO2           
     &          *XCH3HCO+RF(181)*XO2*XCH3HCO                                    
      IF(DEN(13).LT.1.0)DEN(13)=MAX(ADJ*ABV(13),DEN(13),SMALL)                  
      VOLD = XCH3CO                                                             
      XCH3CO = ABV(13)/DEN(13)                                                  
      DIFF = ABS( XCH3CO-VOLD)-MAX(XCH3CO*RTOL,ATOL)                            
      IF(DIFF .GT. 0.) CONV=.FALSE.

!     STEADY-STATE EXPRESSION FOR CH2OCH2O2H      

      ABV(14) = +RF(266)*XCH3OCH2O2+RB(267)*XOH*XCH2O*XCH2O+RB(268)             
     &          *XO2CH2OCH2O2H                                                  
      IF(DEN(14).LT.1.0)DEN(14)=MAX(ADJ*ABV(14),DEN(14),SMALL)                  

!     STEADY-STATE EXPRESSION FOR O2CH2OCH2O2H    

      ABV(15) = +RF(268)*XO2*XCH2OCH2O2H+RB(269)*XOH*XHO2CH2OCHO                
      IF(DEN(15).LT.1.0)DEN(15)=MAX(ADJ*ABV(15),DEN(15),SMALL)                  
      C11 = DEN( 14 )                                                           
      C12 = -RB(268)                                                            
      B1 = ABV(14) +C12*XO2CH2OCH2O2H                                           
      C21 = -RF(268)*XO2                                                        
      C22 = DEN( 15 )                                                           
      B2 = ABV(15) +C21*XCH2OCH2O2H                                             
      CALL DET2(C11,C12,C21,C22,DET)
      CALL DET2(B1,C12,B2,C22,Y1)
      CALL DET2(C11,B1,C21,B2,Y2)
      VOLD = XCH2OCH2O2H                                                        
      XCH2OCH2O2H = Y1/DET                                                      
      DIFF = ABS( XCH2OCH2O2H-VOLD)-MAX(XCH2OCH2O2H*RTOL,ATOL)                  
      IF(DIFF .GT. 0.) CONV=.FALSE.
      VOLD = XO2CH2OCH2O2H                                                      
      XO2CH2OCH2O2H = Y2/DET                                                    
      DIFF = ABS( XO2CH2OCH2O2H-VOLD)-MAX(XO2CH2OCH2O2H*RTOL,ATOL)              
      IF(DIFF .GT. 0.) CONV=.FALSE.

!     STEADY-STATE EXPRESSION FOR C2H4OH          

      ABV(16) = +RF(200)*XOH*XC2H5OH+RF(203)*XH*XC2H5OH+RF(206)*XO              
     &          *XC2H5OH+RF(209)*XCH3*XC2H5OH+RF(213)*XHO2*XC2H5OH              
     &          +RB(230)*XHOC2H4O2+RF(232)*XOH*XC2H4                            
      IF(DEN(16).LT.1.0)DEN(16)=MAX(ADJ*ABV(16),DEN(16),SMALL)                  

!     STEADY-STATE EXPRESSION FOR HOC2H4O2        

      ABV(17) = +RF(230)*XO2*XC2H4OH+RB(231)*XOH*XCH2O*XCH2O                    
      IF(DEN(17).LT.1.0)DEN(17)=MAX(ADJ*ABV(17),DEN(17),SMALL)                  
      C11 = DEN( 16 )                                                           
      C12 = -RB(230)                                                            
      B1 = ABV(16) +C12*XHOC2H4O2                                               
      C21 = -RF(230)*XO2                                                        
      C22 = DEN( 17 )                                                           
      B2 = ABV(17) +C21*XC2H4OH                                                 
      CALL DET2(C11,C12,C21,C22,DET)
      CALL DET2(B1,C12,B2,C22,Y1)
      CALL DET2(C11,B1,C21,B2,Y2)
      VOLD = XC2H4OH                                                            
      XC2H4OH = Y1/DET                                                          
      DIFF = ABS( XC2H4OH-VOLD)-MAX(XC2H4OH*RTOL,ATOL)                          
      IF(DIFF .GT. 0.) CONV=.FALSE.
      VOLD = XHOC2H4O2                                                          
      XHOC2H4O2 = Y2/DET                                                        
      DIFF = ABS( XHOC2H4O2-VOLD)-MAX(XHOC2H4O2*RTOL,ATOL)                      
      IF(DIFF .GT. 0.) CONV=.FALSE.

!     STEADY-STATE EXPRESSION FOR CH3CH2O         

      ABV(18) = +RF(202)*XOH*XC2H5OH+RF(205)*XH*XC2H5OH+RF(208)*XO              
     &          *XC2H5OH+RF(211)*XCH3*XC2H5OH+RF(214)*XHO2*XC2H5OH              
     &          +RB(215)*XH*XCH3HCO*XM(215)+RB(216)*XCH3*XCH2O*XM(216)          
     &          +RB(217)*XHO2*XCH3HCO+RB(218)*XC2H5*XCO2+RB(219)*XCH3           
     &          *XCH2OH+RB(220)*XH2O*XC2H4+RB(221)*XH2O*XCH3HCO+RF(233)         
     &          *XC2H5*XHO2                                                     
      IF(DEN(18).LT.1.0)DEN(18)=MAX(ADJ*ABV(18),DEN(18),SMALL)                  

!     STEADY-STATE EXPRESSION FOR C2H5OH          

      ABV(19) = +RB(198)*XCH3*XCH2OH+RB(199)*XH2O*XC2H4+RB(200)*XH2O            
     &          *XC2H4OH+RB(201)*XH2O*XCH3CHOH+RB(202)*XH2O*XCH3CH2O            
     &          +RB(203)*XH2*XC2H4OH+RB(204)*XH2*XCH3CHOH+RB(205)*XH2           
     &          *XCH3CH2O+RB(206)*XOH*XC2H4OH+RB(207)*XOH*XCH3CHOH              
     &          +RB(208)*XOH*XCH3CH2O+RB(209)*XCH4*XC2H4OH+RB(210)*XCH4         
     &          *XCH3CHOH+RB(211)*XCH4*XCH3CH2O+RB(212)*XH2O2*XCH3CHOH          
     &          +RB(213)*XH2O2*XC2H4OH+RB(214)*XH2O2*XCH3CH2O                   
      IF(DEN(19).LT.1.0)DEN(19)=MAX(ADJ*ABV(19),DEN(19),SMALL)                  

!     STEADY-STATE EXPRESSION FOR CH3CHOH         

      ABV(20) = +RF(201)*XOH*XC2H5OH+RF(204)*XH*XC2H5OH+RF(207)*XO              
     &          *XC2H5OH+RF(210)*XCH3*XC2H5OH+RF(212)*XHO2*XC2H5OH              
     &          +RB(222)*XHO2*XCH3HCO+RB(223)*XHO2*XCH3HCO+RB(224)*XOH          
     &          *XCH3HCO+RB(225)*XH2O*XC2H4+RB(226)*XCH3*XCH2OH+RB(227)         
     &          *XOH*XOH*XCH3HCO+RB(228)*XH2O*XCH3HCO+RB(229)*XH*XCH3HCO        
     &          *XM(229)                                                        
      IF(DEN(20).LT.1.0)DEN(20)=MAX(ADJ*ABV(20),DEN(20),SMALL)                  
      C11 = DEN( 18 )                                                           
      C12 = -RF(202)*XOH-RF(205)*XH-RF(208)*XO-RF(211)*XCH3-RF(214)*XHO2        
      C13 =  0.                                                                 
      B1 = ABV(18) +C12*XC2H5OH+C13*XCH3CHOH                                    
      C21 = -RB(202)*XH2O-RB(205)*XH2-RB(208)*XOH-RB(211)*XCH4-RB(214)          
     &      *XH2O2                                                              
      C22 = DEN( 19 )                                                           
      C23 = -RB(201)*XH2O-RB(204)*XH2-RB(207)*XOH-RB(210)*XCH4-RB(212)          
     &      *XH2O2                                                              
      B2 = ABV(19) +C21*XCH3CH2O+C23*XCH3CHOH                                   
      C31 =  0.                                                                 
      C32 = -RF(201)*XOH-RF(204)*XH-RF(207)*XO-RF(210)*XCH3-RF(212)*XHO2        
      C33 = DEN( 20 )                                                           
      B3 = ABV(20) +C31*XCH3CH2O+C32*XC2H5OH                                    
      CALL DET3(C11,C12,C13,C21,C22,C23,C31,C32,C33,DET)
      CALL DET3(B1,C12,C13,B2,C22,C23,B3,C32,C33,Y1)
      CALL DET3(C11,B1,C13,C21,B2,C23,C31,B3,C33,Y2)
      CALL DET3(C11,C12,B1,C21,C22,B2,C31,C32,B3,Y3)
      VOLD = XCH3CH2O                                                           
      XCH3CH2O = Y1/DET                                                         
      DIFF = ABS( XCH3CH2O-VOLD)-MAX(XCH3CH2O*RTOL,ATOL)                        
      IF(DIFF .GT. 0.) CONV=.FALSE.
      VOLD = XC2H5OH                                                            
      XC2H5OH = Y2/DET                                                          
      DIFF = ABS( XC2H5OH-VOLD)-MAX(XC2H5OH*RTOL,ATOL)                          
      IF(DIFF .GT. 0.) CONV=.FALSE.
      VOLD = XCH3CHOH                                                           
      XCH3CHOH = Y3/DET                                                         
      DIFF = ABS( XCH3CHOH-VOLD)-MAX(XCH3CHOH*RTOL,ATOL)                        
      IF(DIFF .GT. 0.) CONV=.FALSE.

!     STEADY-STATE EXPRESSION FOR HCO             

      ABV(21) = +RB(26)*XH*XCO*XM(26)+RB(27)*XCO*XHO2+RB(28)*XH2*XCO            
     &          +RB(29)*XOH*XCO+RB(30)*XH2O*XCO+RB(31)*XH*XCO2+RB(32)*XH        
     &          *XOH*XCO2+2.00*RB(33)*XH2*XCO*XCO+RB(34)*XCH4*XCO               
     &          +2.00*RB(35)*XCO*XCH2O+RF(36)*XCH2O*XM(36)+RF(38)*XH            
     &          *XCH2O+RF(39)*XO*XCH2O+RF(40)*XOH*XCH2O+RF(41)*XCH2O*XO2        
     &          +RF(42)*XCH2O*XHO2+RF(43)*XCH3*XCH2O+RB(63)*XCO*XCH3OH          
     &          +RB(64)*XCH2O*XCH2O+RB(75)*XCO*XCH3OH+RB(86)*XCH2O              
     &          *XCH2OH+RB(110)*XCO*XC2H6+RF(118)*XO*XC2H4+RF(127)*XC2H3        
     &          *XO2+RF(142)*XOH*XHCCO+RF(148)*XC2H*XO2+RF(151)*XCH2*XO         
     &          +RF(154)*XCH2*XO2+RF(163)*XCH2S*XO+RF(169)*XCH3HCO              
     &          +RF(188)*XH*XCH2HCO+RF(190)*XO*XCH2HCO+RF(194)*XHO2             
     &          *XCH2HCO+RF(245)*XCH2O*XCH3OCH2+RF(260)*XCH2O*XCH3OCH2O2        
     &          +RF(278)*XHCOOH                                                 
      DEN(21) = +RF(26)*XM(26)+RF(27)*XO2+RF(28)*XH+RF(29)*XO+RF(30)*XOH        
     &          +RF(31)*XO+RF(32)*XHO2+2.00*RF(33)*XHCO+RF(34)*XCH3             
     &          +2.00*RF(35)*XHCO+RB(36)*XH*XM(36)+RB(38)*XH2+RB(39)*XOH        
     &          +RB(40)*XH2O+RB(41)*XHO2+RB(42)*XH2O2+RB(43)*XCH4+RF(63)        
     &          *XCH2OH+RF(64)*XCH2OH+RF(75)*XCH3O+RF(86)*XCH3OH+RF(110)        
     &          *XC2H5+RB(118)*XCH3+RB(127)*XCH2O+RB(142)*XH*XCO+RB(148)        
     &          *XCO+RB(151)*XH+RB(154)*XOH+RB(163)*XH+RB(169)*XCH3             
     &          +RB(188)*XCH3+RB(190)*XCH2O+RB(194)*XOH*XCH2O+RB(245)           
     &          *XCH3OCH3+RB(260)*XCH3OCH2O2H+RB(278)*XOH                       
      IF(DEN(21).LT.1.0)DEN(21)=MAX(ADJ*ABV(21),DEN(21),SMALL)                  

!     STEADY-STATE EXPRESSION FOR CH2CO           

      ABV(22) = +RF(123)*XO*XC2H3+RF(134)*XOH*XC2H2+RF(138)*XC2H2*XHO2          
     &          +RF(156)*XCH2*XCO+RB(182)*XCH2*XCO2+RB(183)*XCH3*XCO            
     &          +RB(184)*XH2*XHCCO+RB(185)*XOH*XHCCO+RB(186)*XH2O*XHCCO         
     &          +RB(187)*XCO*XCH2OH+RF(189)*XH*XCH2HCO+RF(191)*XOH              
     &          *XCH2HCO+RF(197)*XCH2HCO                                        
      IF(DEN(22).LT.1.0)DEN(22)=MAX(ADJ*ABV(22),DEN(22),SMALL)                  

!     STEADY-STATE EXPRESSION FOR CH2HCO          

      ABV(23) = +RF(129)*XC2H3*XO2+RF(172)*XOH*XCH3HCO+RF(174)*XO               
     &          *XCH3HCO+RF(176)*XH*XCH3HCO+RF(178)*XCH3*XCH3HCO+RF(180)        
     &          *XHO2*XCH3HCO+RB(188)*XCH3*XHCO+RB(189)*XH2*XCH2CO              
     &          +RB(190)*XHCO*XCH2O+RB(191)*XH2O*XCH2CO+RB(192)*XOH*XCO         
     &          *XCH2O+RB(193)*XH*XCO*XC2H5+RB(194)*XOH*XHCO*XCH2O              
     &          +RB(195)*XO2*XCH3HCO+RB(196)*XCH3*XCO+RB(197)*XH*XCH2CO         
      IF(DEN(23).LT.1.0)DEN(23)=MAX(ADJ*ABV(23),DEN(23),SMALL)                  

!     STEADY-STATE EXPRESSION FOR HCCO            

      ABV(24) = +RF(131)*XO*XC2H2+RB(139)*XCH2S*XCO+RB(140)*XH*XCO*XCO          
     &          +RB(141)*XOH*XCO*XCO+RB(142)*XH*XCO*XHCO+RB(143)*XC2H3          
     &          *XCO+2.00*RB(144)*XC2H2*XCO*XCO+RB(145)*XCO*XC2H4               
     &          +RF(147)*XOH*XC2H+RF(184)*XH*XCH2CO+RF(185)*XO*XCH2CO           
     &          +RF(186)*XOH*XCH2CO                                             
      DEN(24) = +RB(131)*XH+RF(139)*XH+RF(140)*XO+RF(141)*XO2+RF(142)           
     &          *XOH+RF(143)*XCH2+2.00*RF(144)*XHCCO+RF(145)*XCH3               
     &          +RB(147)*XH+RB(184)*XH2+RB(185)*XOH+RB(186)*XH2O                
      IF(DEN(24).LT.1.0)DEN(24)=MAX(ADJ*ABV(24),DEN(24),SMALL)                  

!     STEADY-STATE EXPRESSION FOR CH3HCO          

      ABV(25) = +RF(111)*XO*XC2H5+RB(169)*XCH3*XHCO+RB(171)*XH2O*XCH3CO         
     &          +RB(172)*XH2O*XCH2HCO+RB(173)*XOH*XCH3CO+RB(174)*XOH            
     &          *XCH2HCO+RB(175)*XH2*XCH3CO+RB(176)*XH2*XCH2HCO+RB(177)         
     &          *XCH4*XCH3CO+RB(178)*XCH4*XCH2HCO+RB(179)*XH2O2*XCH3CO          
     &          +RB(180)*XH2O2*XCH2HCO+RB(181)*XHO2*XCH3CO+RF(195)*XHO2         
     &          *XCH2HCO+RF(215)*XCH3CH2O*XM(215)+RF(217)*XO2*XCH3CH2O          
     &          +RF(221)*XOH*XCH3CH2O+RF(222)*XO2*XCH3CHOH+RF(223)*XO2          
     &          *XCH3CHOH+RF(224)*XO*XCH3CHOH+RF(227)*XHO2*XCH3CHOH             
     &          +RF(228)*XOH*XCH3CHOH+RF(229)*XCH3CHOH*XM(229)                  
      IF(DEN(25).LT.1.0)DEN(25)=MAX(ADJ*ABV(25),DEN(25),SMALL)                  
      A5(1,1)= DEN( 21 )                                                        
      A5(1,2) = 0.                                                              
      A5(1,3) = -RF(188)*XH-RF(190)*XO-RF(194)*XHO2                             
      A5(1,4) = -RF(142)*XOH                                                    
      A5(1,5) = -RF(169)                                                        
      B(1)= ABV(21) +A5(1,2)*XCH2CO+A5(1,3)*XCH2HCO+A5(1,4)*XHCCO               
     & +A5(1,5)*XCH3HCO                                                         
      A5(2,1) = 0.                                                              
      A5(2,2)= DEN( 22 )                                                        
      A5(2,3) = -RF(189)*XH-RF(191)*XOH-RF(197)                                 
      A5(2,4) = -RB(184)*XH2-RB(185)*XOH-RB(186)*XH2O                           
      A5(2,5) = 0.                                                              
      B(2)= ABV(22) +A5(2,1)*XHCO+A5(2,3)*XCH2HCO+A5(2,4)*XHCCO+A5(2,5)*        
     & XCH3HCO                                                                  
      A5(3,1) = -RB(188)*XCH3-RB(190)*XCH2O-RB(194)*XOH*XCH2O                   
      A5(3,2) = -RB(189)*XH2-RB(191)*XH2O-RB(197)*XH                            
      A5(3,3)= DEN( 23 )                                                        
      A5(3,4) = 0.                                                              
      A5(3,5) = -RF(172)*XOH-RF(174)*XO-RF(176)*XH-RF(178)*XCH3-RF(180)         
     &          *XHO2-RB(195)*XO2                                               
      B(3)= ABV(23) +A5(3,1)*XHCO+A5(3,2)*XCH2CO+A5(3,4)*XHCCO+A5(3,5)*         
     & XCH3HCO                                                                  
      A5(4,1) = -RB(142)*XH*XCO                                                 
      A5(4,2) = -RF(184)*XH-RF(185)*XO-RF(186)*XOH                              
      A5(4,3) = 0.                                                              
      A5(4,4)= DEN( 24 )                                                        
      A5(4,5) = 0.                                                              
      B(4)= ABV(24) +A5(4,1)*XHCO+A5(4,2)*XCH2CO+A5(4,3)*XCH2HCO                
     & +A5(4,5)*XCH3HCO                                                         
      A5(5,1) = -RB(169)*XCH3                                                   
      A5(5,2) = 0.                                                              
      A5(5,3) = -RB(172)*XH2O-RB(174)*XOH-RB(176)*XH2-RB(178)*XCH4              
     &          -RB(180)*XH2O2-RF(195)*XHO2                                     
      A5(5,4) = 0.                                                              
      A5(5,5)= DEN( 25 )                                                        
      B(5)= ABV(25) +A5(5,1)*XHCO+A5(5,2)*XCH2CO+A5(5,3)*XCH2HCO                
     & +A5(5,4)*XHCCO                                                           
      CALL LUDCMP(A5,5,5,INDXX,D,VV,KS)                                         
        IF(KS .GT. 0) THEN
          WRITE(*,*) 'STEADYE: PROBLEM IN SOLVING GROUP'
          WRITE(*,*) 'STARTING WITH HCO              '
          STOP
        END IF
      CALL LUBKSB(A5,5,5,INDXX,B)                                               
      VOLD = XHCO                                                               
      XHCO = MAX(0.D0, B(1) )                                                   
      DIFF = ABS( XHCO-VOLD)-MAX(XHCO*RTOL,ATOL)                                
      IF(DIFF .GT. 0.) CONV=.FALSE.
      VOLD = XCH2CO                                                             
      XCH2CO = MAX(0.D0, B(2) )                                                 
      DIFF = ABS( XCH2CO-VOLD)-MAX(XCH2CO*RTOL,ATOL)                            
      IF(DIFF .GT. 0.) CONV=.FALSE.
      VOLD = XCH2HCO                                                            
      XCH2HCO = MAX(0.D0, B(3) )                                                
      DIFF = ABS( XCH2HCO-VOLD)-MAX(XCH2HCO*RTOL,ATOL)                          
      IF(DIFF .GT. 0.) CONV=.FALSE.
      VOLD = XHCCO                                                              
      XHCCO = MAX(0.D0, B(4) )                                                  
      DIFF = ABS( XHCCO-VOLD)-MAX(XHCCO*RTOL,ATOL)                              
      IF(DIFF .GT. 0.) CONV=.FALSE.
      VOLD = XCH3HCO                                                            
      XCH3HCO = MAX(0.D0, B(5) )                                                
      DIFF = ABS( XCH3HCO-VOLD)-MAX(XCH3HCO*RTOL,ATOL)                          
      IF(DIFF .GT. 0.) CONV=.FALSE.

      RETURN
      END

      SUBROUTINE UPVALUE(IOPT, VNEW, BIG, LBOUND, ATOL, RTOL, CONV,
     &    XOCH2OCHO, XHCCOH, XHOCH2O, XOCHO, XC2H, XC2H3, XCH3OCH2,             
     &    XCH3O, XCH2OH, XCH2S, XCH3OCH2O, XCH3OCO, XCH3CO, XCH2OCH2O2H,        
     &    XO2CH2OCH2O2H, XC2H4OH, XHOC2H4O2, XCH3CH2O, XC2H5OH,                 
     &    XCH3CHOH, XHCO, XCH2CO, XCH2HCO, XHCCO, XCH3HCO )                     

!*****double precision
        IMPLICIT DOUBLE PRECISION (A-H, O-Z), INTEGER (I-N)
!*****END double precision
!*****single precision
!       IMPLICIT REAL (A-H, O-Z), INTEGER (I-N)
!*****END single precision

      DIMENSION VNEW(*)
      LOGICAL  CONV, LBOUND(*)

      IF( IOPT .EQ. 1 ) THEN
        XOCH2OCHO = VNEW(1)                                                     
        XHCCOH = VNEW(2)                                                        
        XHOCH2O = VNEW(3)                                                       
        XOCHO = VNEW(4)                                                         
        XC2H = VNEW(5)                                                          
        XC2H3 = VNEW(6)                                                         
        XCH3OCH2 = VNEW(7)                                                      
        XCH3O = VNEW(8)                                                         
        XCH2OH = VNEW(9)                                                        
        XCH2S = VNEW(10)                                                        
        XCH3OCH2O = VNEW(11)                                                    
        XCH3OCO = VNEW(12)                                                      
        XCH3CO = VNEW(13)                                                       
        XCH2OCH2O2H = VNEW(14)                                                  
        XO2CH2OCH2O2H = VNEW(15)                                                
        XC2H4OH = VNEW(16)                                                      
        XHOC2H4O2 = VNEW(17)                                                    
        XCH3CH2O = VNEW(18)                                                     
        XC2H5OH = VNEW(19)                                                      
        XCH3CHOH = VNEW(20)                                                     
        XHCO = VNEW(21)                                                         
        XCH2CO = VNEW(22)                                                       
        XCH2HCO = VNEW(23)                                                      
        XHCCO = VNEW(24)                                                        
        XCH3HCO = VNEW(25)                                                      
      ELSEIF( IOPT .EQ. 2 ) THEN
        CONV=.TRUE.

        CALL EXBOUND( XOCH2OCHO, VNEW(1), LBOUND(1),BIG,ATOL,RTOL,CONV)         
        CALL EXBOUND( XHCCOH, VNEW(2), LBOUND(2),BIG,ATOL,RTOL,CONV)            
        CALL EXBOUND( XHOCH2O, VNEW(3), LBOUND(3),BIG,ATOL,RTOL,CONV)           
        CALL EXBOUND( XOCHO, VNEW(4), LBOUND(4),BIG,ATOL,RTOL,CONV)             
        CALL EXBOUND( XC2H, VNEW(5), LBOUND(5),BIG,ATOL,RTOL,CONV)              
        CALL EXBOUND( XC2H3, VNEW(6), LBOUND(6),BIG,ATOL,RTOL,CONV)             
        CALL EXBOUND( XCH3OCH2, VNEW(7), LBOUND(7),BIG,ATOL,RTOL,CONV)          
        CALL EXBOUND( XCH3O, VNEW(8), LBOUND(8),BIG,ATOL,RTOL,CONV)             
        CALL EXBOUND( XCH2OH, VNEW(9), LBOUND(9),BIG,ATOL,RTOL,CONV)            
        CALL EXBOUND( XCH2S, VNEW(10), LBOUND(10),BIG,ATOL,RTOL,CONV)           
        CALL EXBOUND( XCH3OCH2O, VNEW(11), LBOUND(11)                           
     &    ,BIG,ATOL,RTOL,CONV)                                                  
        CALL EXBOUND( XCH3OCO, VNEW(12), LBOUND(12),BIG,ATOL,RTOL,CONV)         
        CALL EXBOUND( XCH3CO, VNEW(13), LBOUND(13),BIG,ATOL,RTOL,CONV)          
        CALL EXBOUND( XCH2OCH2O2H, VNEW(14), LBOUND(14)                         
     &    ,BIG,ATOL,RTOL,CONV)                                                  
        CALL EXBOUND( XO2CH2OCH2O2H, VNEW(15), LBOUND(15)                       
     &    ,BIG,ATOL,RTOL,CONV)                                                  
        CALL EXBOUND( XC2H4OH, VNEW(16), LBOUND(16),BIG,ATOL,RTOL,CONV)         
        CALL EXBOUND( XHOC2H4O2, VNEW(17), LBOUND(17)                           
     &    ,BIG,ATOL,RTOL,CONV)                                                  
        CALL EXBOUND( XCH3CH2O, VNEW(18), LBOUND(18)                            
     &    ,BIG,ATOL,RTOL,CONV)                                                  
        CALL EXBOUND( XC2H5OH, VNEW(19), LBOUND(19),BIG,ATOL,RTOL,CONV)         
        CALL EXBOUND( XCH3CHOH, VNEW(20), LBOUND(20)                            
     &    ,BIG,ATOL,RTOL,CONV)                                                  
        CALL EXBOUND( XHCO, VNEW(21), LBOUND(21),BIG,ATOL,RTOL,CONV)            
        CALL EXBOUND( XCH2CO, VNEW(22), LBOUND(22),BIG,ATOL,RTOL,CONV)          
        CALL EXBOUND( XCH2HCO, VNEW(23), LBOUND(23),BIG,ATOL,RTOL,CONV)         
        CALL EXBOUND( XHCCO, VNEW(24), LBOUND(24),BIG,ATOL,RTOL,CONV)           
        CALL EXBOUND( XCH3HCO, VNEW(25), LBOUND(25),BIG,ATOL,RTOL,CONV)         
      ELSEIF( IOPT .EQ. 3 ) THEN
        VNEW(1) = XOCH2OCHO                                                     
        VNEW(2) = XHCCOH                                                        
        VNEW(3) = XHOCH2O                                                       
        VNEW(4) = XOCHO                                                         
        VNEW(5) = XC2H                                                          
        VNEW(6) = XC2H3                                                         
        VNEW(7) = XCH3OCH2                                                      
        VNEW(8) = XCH3O                                                         
        VNEW(9) = XCH2OH                                                        
        VNEW(10) = XCH2S                                                        
        VNEW(11) = XCH3OCH2O                                                    
        VNEW(12) = XCH3OCO                                                      
        VNEW(13) = XCH3CO                                                       
        VNEW(14) = XCH2OCH2O2H                                                  
        VNEW(15) = XO2CH2OCH2O2H                                                
        VNEW(16) = XC2H4OH                                                      
        VNEW(17) = XHOC2H4O2                                                    
        VNEW(18) = XCH3CH2O                                                     
        VNEW(19) = XC2H5OH                                                      
        VNEW(20) = XCH3CHOH                                                     
        VNEW(21) = XHCO                                                         
        VNEW(22) = XCH2CO                                                       
        VNEW(23) = XCH2HCO                                                      
        VNEW(24) = XHCCO                                                        
        VNEW(25) = XCH3HCO                                                      
      ENDIF

      RETURN
      END

      SUBROUTINE EXBOUND(VOLD, B, LBOUND, BIG, ATOL, RTOL, CONV )

!*****double precision
        IMPLICIT DOUBLE PRECISION (A-H, O-Z), INTEGER (I-N)
!*****END double precision
!*****single precision
!       IMPLICIT REAL (A-H, O-Z), INTEGER (I-N)
!*****END single precision

      PARAMETER (VBOUND = 100.0)

      LOGICAL  CONV, LBOUND
      AA = VOLD - B
      VALUEN= MAX(AA,0.D0)
      IF( ABS(AA) .LT. VBOUND ) THEN
        IF( VALUEN .LT. BIG ) THEN
          DIFF = ABS(VALUEN-VOLD)-MAX(VALUEN*RTOL, ATOL)
          IF(DIFF .GT. 0.) CONV=.FALSE.
          VOLD = VALUEN
          LBOUND = .TRUE.
        ELSE
          LBOUND = .FALSE.
          CONV= .FALSE. 
        ENDIF
      ELSE
        LBOUND = .FALSE.
        CONV= .FALSE.
      ENDIF

      RETURN
      END

      SUBROUTINE NETRATE( W, RF, RB, XM, XH, XH2, XCH2, XCH2S, XCH3, XO,        
     &  XCH4, XOH, XH2O, XC2H, XC2H2, XC2H3, XCO, XC2H4, XHCO, XC2H5,           
     &  XCH2O, XC2H6, XCH2OH, XCH3O, XO2, XCH3OH, XHO2, XH2O2, XHCCO,           
     &  XCH2CO, XHCCOH, XCH2HCO, XCH3CO, XCO2, XCH3HCO, XOCHO, XCH3CHOH,        
     &  XC2H4OH, XCH3CH2O, XCH3OCH2, XHCOOH, XCH3OCH3, XC2H5OH, XHOCH2O,        
     &  XCH3OCO, XCH3OCHO, XCH3OCH2O, XCH3OCH2OH, XOCH2OCHO, XHOCH2OCO,         
     &  XHOC2H4O2, XCH3OCH2O2, XCH2OCH2O2H, XCH3OCH2O2H, XHO2CH2OCHO,           
     &  XO2CH2OCH2O2H, XN2 )                                                    

!*****double precision
        IMPLICIT DOUBLE PRECISION (A-H, O-Z), INTEGER (I-N)
!*****END double precision
!*****single precision
!       IMPLICIT REAL (A-H, O-Z), INTEGER (I-N)
!*****END single precision

      DIMENSION W(*), RF(*), RB(*), XM(*)

!   NET PRODUCTION RATES FOR SKELETAL MECHANSIM

      W(1)=RF(1)*XH*XO2-RB(1)*XO*XOH                                    
      W(2)=RF(2)*XH2*XO-RB(2)*XH*XOH                                    
      W(3)=RF(3)*XH2*XOH-RB(3)*XH*XH2O                                  
      W(4)=RF(4)*XO*XH2O-RB(4)*XOH*XOH                                  
      W(5)=RF(5)*XH2*XM(5)-RB(5)*XH*XH*XM(5)                            
      W(6)=RF(6)*XO*XO*XM(6)-RB(6)*XO2*XM(6)                            
      W(7)=RF(7)*XH*XO*XM(7)-RB(7)*XOH*XM(7)                            
      W(8)=RF(8)*XH*XOH*XM(8)-RB(8)*XH2O*XM(8)                          
      W(9)=RF(9)*XH*XO2-RB(9)*XHO2                                      
      W(10)=RF(10)*XH*XHO2-RB(10)*XH2*XO2                               
      W(11)=RF(11)*XH*XHO2-RB(11)*XOH*XOH                               
      W(12)=RF(12)*XO*XHO2-RB(12)*XOH*XO2                               
      W(13)=RF(13)*XOH*XHO2-RB(13)*XH2O*XO2                             
      W(14)=RF(14)*XHO2*XHO2-RB(14)*XO2*XH2O2                           
      W(15)=RF(15)*XHO2*XHO2-RB(15)*XO2*XH2O2                           
      W(16)=RF(16)*XH2O2-RB(16)*XOH*XOH                                 
      W(17)=RF(17)*XH*XH2O2-RB(17)*XOH*XH2O                             
      W(18)=RF(18)*XH*XH2O2-RB(18)*XH2*XHO2                             
      W(19)=RF(19)*XO*XH2O2-RB(19)*XOH*XHO2                             
      W(20)=RF(20)*XOH*XH2O2-RB(20)*XH2O*XHO2                           
      W(21)=RF(21)*XOH*XH2O2-RB(21)*XH2O*XHO2                           
      W(22)=RF(22)*XO*XCO-RB(22)*XCO2                                   
      W(23)=RF(23)*XCO*XO2-RB(23)*XO*XCO2                               
      W(24)=RF(24)*XCO*XHO2-RB(24)*XOH*XCO2                             
      W(25)=RF(25)*XOH*XCO-RB(25)*XH*XCO2                               
      W(26)=RF(26)*XHCO*XM(26)-RB(26)*XH*XCO*XM(26)                     
      W(27)=RF(27)*XHCO*XO2-RB(27)*XCO*XHO2                             
      W(28)=RF(28)*XH*XHCO-RB(28)*XH2*XCO                               
      W(29)=RF(29)*XO*XHCO-RB(29)*XOH*XCO                               
      W(30)=RF(30)*XOH*XHCO-RB(30)*XH2O*XCO                             
      W(31)=RF(31)*XO*XHCO-RB(31)*XH*XCO2                               
      W(32)=RF(32)*XHCO*XHO2-RB(32)*XH*XOH*XCO2                         
      W(33)=RF(33)*XHCO*XHCO-RB(33)*XH2*XCO*XCO                         
      W(34)=RF(34)*XCH3*XHCO-RB(34)*XCH4*XCO                            
      W(35)=RF(35)*XHCO*XHCO-RB(35)*XCO*XCH2O                           
      W(36)=RF(36)*XCH2O*XM(36)-RB(36)*XH*XHCO*XM(36)                   
      W(37)=RF(37)*XCH2O*XM(37)-RB(37)*XH2*XCO*XM(37)                   
      W(38)=RF(38)*XH*XCH2O-RB(38)*XH2*XHCO                             
      W(39)=RF(39)*XO*XCH2O-RB(39)*XOH*XHCO                             
      W(40)=RF(40)*XOH*XCH2O-RB(40)*XH2O*XHCO                           
      W(41)=RF(41)*XCH2O*XO2-RB(41)*XHCO*XHO2                           
      W(42)=RF(42)*XCH2O*XHO2-RB(42)*XHCO*XH2O2                         
      W(43)=RF(43)*XCH3*XCH2O-RB(43)*XCH4*XHCO                          
      W(44)=RF(44)*XCH3*XO-RB(44)*XH*XCH2O                              
      W(45)=RF(45)*XCH3*XO2-RB(45)*XO*XCH3O                             
      W(46)=RF(46)*XCH3*XO2-RB(46)*XOH*XCH2O                            
      W(47)=RF(47)*XCH3*XHO2-RB(47)*XOH*XCH3O                           
      W(48)=RF(48)*XCH3*XCH3-RB(48)*XC2H6                               
      W(49)=RF(49)*XH*XCH3-RB(49)*XCH4                                  
      W(50)=RF(50)*XH*XCH4-RB(50)*XH2*XCH3                              
      W(51)=RF(51)*XO*XCH4-RB(51)*XCH3*XOH                              
      W(52)=RF(52)*XCH4*XOH-RB(52)*XCH3*XH2O                            
      W(53)=RF(53)*XCH3*XHO2-RB(53)*XCH4*XO2                            
      W(54)=RF(54)*XCH4*XHO2-RB(54)*XCH3*XH2O2                          
      W(55)=RF(55)*XCH2OH*XM(55)-RB(55)*XH*XCH2O*XM(55)                 
      W(56)=RF(56)*XH*XCH2OH-RB(56)*XH2*XCH2O                           
      W(57)=RF(57)*XH*XCH2OH-RB(57)*XCH3*XOH                            
      W(58)=RF(58)*XO*XCH2OH-RB(58)*XOH*XCH2O                           
      W(59)=RF(59)*XOH*XCH2OH-RB(59)*XH2O*XCH2O                         
      W(60)=RF(60)*XCH2OH*XO2-RB(60)*XCH2O*XHO2                         
      W(61)=RF(61)*XCH2OH*XO2-RB(61)*XCH2O*XHO2                         
      W(62)=RF(62)*XCH2OH*XHO2-RB(62)*XCH2O*XH2O2                       
      W(63)=RF(63)*XHCO*XCH2OH-RB(63)*XCO*XCH3OH                        
      W(64)=RF(64)*XHCO*XCH2OH-RB(64)*XCH2O*XCH2O                       
      W(65)=RF(65)*XCH2OH*XCH2OH-RB(65)*XCH2O*XCH3OH                    
      W(66)=RF(66)*XCH2OH*XCH3O-RB(66)*XCH2O*XCH3OH                     
      W(67)=RF(67)*XCH3O*XM(67)-RB(67)*XH*XCH2O*XM(67)                  
      W(68)=RF(68)*XH*XCH3O-RB(68)*XCH3*XOH                             
      W(69)=RF(69)*XO*XCH3O-RB(69)*XOH*XCH2O                            
      W(70)=RF(70)*XOH*XCH3O-RB(70)*XH2O*XCH2O                          
      W(71)=RF(71)*XCH3O*XO2-RB(71)*XCH2O*XHO2                          
      W(72)=RF(72)*XCH3O*XO2-RB(72)*XCH2O*XHO2                          
      W(73)=RF(73)*XCH3O*XHO2-RB(73)*XCH2O*XH2O2                        
      W(74)=RF(74)*XCO*XCH3O-RB(74)*XCH3*XCO2                           
      W(75)=RF(75)*XHCO*XCH3O-RB(75)*XCO*XCH3OH                         
      W(76)=RF(76)*XCH3O*XCH3O-RB(76)*XCH2O*XCH3OH                      
      W(77)=RF(77)*XCH3*XOH-RB(77)*XCH3OH                               
      W(78)=RF(78)*XH*XCH2OH-RB(78)*XCH3OH                              
      W(79)=RF(79)*XH*XCH3O-RB(79)*XCH3OH                               
      W(80)=RF(80)*XH*XCH3OH-RB(80)*XH2*XCH2OH                          
      W(81)=RF(81)*XH*XCH3OH-RB(81)*XH2*XCH3O                           
      W(82)=RF(82)*XO*XCH3OH-RB(82)*XOH*XCH2OH                          
      W(83)=RF(83)*XOH*XCH3OH-RB(83)*XH2O*XCH3O                         
      W(84)=RF(84)*XOH*XCH3OH-RB(84)*XH2O*XCH2OH                        
      W(85)=RF(85)*XO2*XCH3OH-RB(85)*XCH2OH*XHO2                        
      W(86)=RF(86)*XHCO*XCH3OH-RB(86)*XCH2O*XCH2OH                      
      W(87)=RF(87)*XCH3OH*XHO2-RB(87)*XCH2OH*XH2O2                      
      W(88)=RF(88)*XCH3*XCH3OH-RB(88)*XCH4*XCH2OH                       
      W(89)=RF(89)*XCH3O*XCH3OH-RB(89)*XCH2OH*XCH3OH                    
      W(90)=RF(90)*XCH3*XCH3-RB(90)*XH*XC2H5                            
      W(91)=RF(91)*XCH2*XCH4-RB(91)*XCH3*XCH3                           
      W(92)=RF(92)*XCH2S*XCH4-RB(92)*XCH3*XCH3                          
      W(93)=RF(93)*XCH3*XOH-RB(93)*XCH2*XH2O                            
      W(94)=RF(94)*XCH3*XOH-RB(94)*XCH2S*XH2O                           
      W(95)=RF(95)*XCH2*XCH3-RB(95)*XH*XC2H4                            
      W(96)=RF(96)*XCH2S*XCH3-RB(96)*XH*XC2H4                           
      W(97)=RF(97)*XH*XCH3O-RB(97)*XCH2S*XH2O                           
      W(98)=RF(98)*XCH2S*XH2O-RB(98)*XCH3OH                             
      W(99)=RF(99)*XH*XC2H6-RB(99)*XH2*XC2H5                            
      W(100)=RF(100)*XO*XC2H6-RB(100)*XOH*XC2H5                         
      W(101)=RF(101)*XOH*XC2H6-RB(101)*XH2O*XC2H5                       
      W(102)=RF(102)*XC2H6*XO2-RB(102)*XC2H5*XHO2                       
      W(103)=RF(103)*XC2H6*XHO2-RB(103)*XC2H5*XH2O2                     
      W(104)=RF(104)*XCH3*XC2H6-RB(104)*XCH4*XC2H5                      
      W(105)=RF(105)*XH*XC2H5-RB(105)*XC2H6                             
      W(106)=RF(106)*XH*XC2H5-RB(106)*XH2*XC2H4                         
      W(107)=RF(107)*XO*XC2H5-RB(107)*XCH3*XCH2O                        
      W(108)=RF(108)*XC2H5*XO2-RB(108)*XC2H4*XHO2                       
      W(109)=RF(109)*XC2H5*XC2H5-RB(109)*XC2H4*XC2H6                    
      W(110)=RF(110)*XHCO*XC2H5-RB(110)*XCO*XC2H6                       
      W(111)=RF(111)*XO*XC2H5-RB(111)*XH*XCH3HCO                        
      W(112)=RF(112)*XC2H4-RB(112)*XH2*XC2H2                            
      W(113)=RF(113)*XH*XC2H4-RB(113)*XC2H5                             
      W(114)=RF(114)*XH*XC2H3-RB(114)*XC2H4                             
      W(115)=RF(115)*XH*XC2H4-RB(115)*XH2*XC2H3                         
      W(116)=RF(116)*XOH*XC2H4-RB(116)*XH2O*XC2H3                       
      W(117)=RF(117)*XCH3*XC2H4-RB(117)*XCH4*XC2H3                      
      W(118)=RF(118)*XO*XC2H4-RB(118)*XCH3*XHCO                         
      W(119)=RF(119)*XOH*XC2H3-RB(119)*XH2O*XC2H2                       
      W(120)=RF(120)*XO*XC2H4-RB(120)*XOH*XC2H3                         
      W(121)=RF(121)*XC2H4*XO2-RB(121)*XC2H3*XHO2                       
      W(122)=RF(122)*XH*XC2H3-RB(122)*XH2*XC2H2                         
      W(123)=RF(123)*XO*XC2H3-RB(123)*XH*XCH2CO                         
      W(124)=RF(124)*XC2H3*XH2O2-RB(124)*XC2H4*XHO2                     
      W(125)=RF(125)*XCH3*XC2H3-RB(125)*XCH4*XC2H2                      
      W(126)=RF(126)*XC2H3*XC2H3-RB(126)*XC2H2*XC2H4                    
      W(127)=RF(127)*XC2H3*XO2-RB(127)*XHCO*XCH2O                       
      W(128)=RF(128)*XC2H3*XO2-RB(128)*XC2H2*XHO2                       
      W(129)=RF(129)*XC2H3*XO2-RB(129)*XO*XCH2HCO                       
      W(130)=RF(130)*XH*XC2H2-RB(130)*XC2H3                             
      W(131)=RF(131)*XO*XC2H2-RB(131)*XH*XHCCO                          
      W(132)=RF(132)*XO*XC2H2-RB(132)*XOH*XC2H                          
      W(133)=RF(133)*XO*XC2H2-RB(133)*XCH2*XCO                          
      W(134)=RF(134)*XOH*XC2H2-RB(134)*XH*XCH2CO                        
      W(135)=RF(135)*XOH*XC2H2-RB(135)*XH*XHCCOH                        
      W(136)=RF(136)*XOH*XC2H2-RB(136)*XH2O*XC2H                        
      W(137)=RF(137)*XOH*XC2H2-RB(137)*XCH3*XCO                         
      W(138)=RF(138)*XC2H2*XHO2-RB(138)*XOH*XCH2CO                      
      W(139)=RF(139)*XH*XHCCO-RB(139)*XCH2S*XCO                         
      W(140)=RF(140)*XO*XHCCO-RB(140)*XH*XCO*XCO                        
      W(141)=RF(141)*XO2*XHCCO-RB(141)*XOH*XCO*XCO                      
      W(142)=RF(142)*XOH*XHCCO-RB(142)*XH*XCO*XHCO                      
      W(143)=RF(143)*XCH2*XHCCO-RB(143)*XC2H3*XCO                       
      W(144)=RF(144)*XHCCO*XHCCO-RB(144)*XC2H2*XCO*XCO                  
      W(145)=RF(145)*XCH3*XHCCO-RB(145)*XCO*XC2H4                       
      W(146)=RF(146)*XH*XC2H-RB(146)*XC2H2                              
      W(147)=RF(147)*XOH*XC2H-RB(147)*XH*XHCCO                          
      W(148)=RF(148)*XC2H*XO2-RB(148)*XCO*XHCO                          
      W(149)=RF(149)*XH2*XC2H-RB(149)*XH*XC2H2                          
      W(150)=RF(150)*XH*XCH2-RB(150)*XCH3                               
      W(151)=RF(151)*XCH2*XO-RB(151)*XH*XHCO                            
      W(152)=RF(152)*XCH2*XOH-RB(152)*XH*XCH2O                          
      W(153)=RF(153)*XH2*XCH2-RB(153)*XH*XCH3                           
      W(154)=RF(154)*XCH2*XO2-RB(154)*XOH*XHCO                          
      W(155)=RF(155)*XCH2*XHO2-RB(155)*XOH*XCH2O                        
      W(156)=RF(156)*XCH2*XCO-RB(156)*XCH2CO                            
      W(157)=RF(157)*XCH2*XCH2-RB(157)*XH2*XC2H2                        
      W(158)=RF(158)*XCH2S*XM(158)-RB(158)*XCH2*XM(158)                 
      W(159)=RF(159)*XCH2S*XH2O-RB(159)*XCH2*XH2O                       
      W(160)=RF(160)*XCH2S*XCO-RB(160)*XCH2*XCO                         
      W(161)=RF(161)*XCH2S*XCO2-RB(161)*XCH2*XCO2                       
      W(162)=RF(162)*XCH2S*XO-RB(162)*XH2*XCO                           
      W(163)=RF(163)*XCH2S*XO-RB(163)*XH*XHCO                           
      W(164)=RF(164)*XCH2S*XOH-RB(164)*XH*XCH2O                         
      W(165)=RF(165)*XH2*XCH2S-RB(165)*XH*XCH3                          
      W(166)=RF(166)*XCH2S*XO2-RB(166)*XH*XOH*XCO                       
      W(167)=RF(167)*XCH2S*XO2-RB(167)*XH2O*XCO                         
      W(168)=RF(168)*XCH2S*XCO2-RB(168)*XCO*XCH2O                       
      W(169)=RF(169)*XCH3HCO-RB(169)*XCH3*XHCO                          
      W(170)=RF(170)*XCH3CO-RB(170)*XCH3*XCO                            
      W(171)=RF(171)*XOH*XCH3HCO-RB(171)*XH2O*XCH3CO                    
      W(172)=RF(172)*XOH*XCH3HCO-RB(172)*XH2O*XCH2HCO                   
      W(173)=RF(173)*XO*XCH3HCO-RB(173)*XOH*XCH3CO                      
      W(174)=RF(174)*XO*XCH3HCO-RB(174)*XOH*XCH2HCO                     
      W(175)=RF(175)*XH*XCH3HCO-RB(175)*XH2*XCH3CO                      
      W(176)=RF(176)*XH*XCH3HCO-RB(176)*XH2*XCH2HCO                     
      W(177)=RF(177)*XCH3*XCH3HCO-RB(177)*XCH4*XCH3CO                   
      W(178)=RF(178)*XCH3*XCH3HCO-RB(178)*XCH4*XCH2HCO                  
      W(179)=RF(179)*XHO2*XCH3HCO-RB(179)*XH2O2*XCH3CO                  
      W(180)=RF(180)*XHO2*XCH3HCO-RB(180)*XH2O2*XCH2HCO                 
      W(181)=RF(181)*XO2*XCH3HCO-RB(181)*XHO2*XCH3CO                    
      W(182)=RF(182)*XO*XCH2CO-RB(182)*XCH2*XCO2                        
      W(183)=RF(183)*XH*XCH2CO-RB(183)*XCH3*XCO                         
      W(184)=RF(184)*XH*XCH2CO-RB(184)*XH2*XHCCO                        
      W(185)=RF(185)*XO*XCH2CO-RB(185)*XOH*XHCCO                        
      W(186)=RF(186)*XOH*XCH2CO-RB(186)*XH2O*XHCCO                      
      W(187)=RF(187)*XOH*XCH2CO-RB(187)*XCO*XCH2OH                      
      W(188)=RF(188)*XH*XCH2HCO-RB(188)*XCH3*XHCO                       
      W(189)=RF(189)*XH*XCH2HCO-RB(189)*XH2*XCH2CO                      
      W(190)=RF(190)*XO*XCH2HCO-RB(190)*XHCO*XCH2O                      
      W(191)=RF(191)*XOH*XCH2HCO-RB(191)*XH2O*XCH2CO                    
      W(192)=RF(192)*XO2*XCH2HCO-RB(192)*XOH*XCO*XCH2O                  
      W(193)=RF(193)*XCH3*XCH2HCO-RB(193)*XH*XCO*XC2H5                  
      W(194)=RF(194)*XHO2*XCH2HCO-RB(194)*XOH*XHCO*XCH2O                
      W(195)=RF(195)*XHO2*XCH2HCO-RB(195)*XO2*XCH3HCO                   
      W(196)=RF(196)*XCH2HCO-RB(196)*XCH3*XCO                           
      W(197)=RF(197)*XCH2HCO-RB(197)*XH*XCH2CO                          
      W(198)=RF(198)*XC2H5OH-RB(198)*XCH3*XCH2OH                        
      W(199)=RF(199)*XC2H5OH-RB(199)*XH2O*XC2H4                         
      W(200)=RF(200)*XOH*XC2H5OH-RB(200)*XH2O*XC2H4OH                   
      W(201)=RF(201)*XOH*XC2H5OH-RB(201)*XH2O*XCH3CHOH                  
      W(202)=RF(202)*XOH*XC2H5OH-RB(202)*XH2O*XCH3CH2O                  
      W(203)=RF(203)*XH*XC2H5OH-RB(203)*XH2*XC2H4OH                     
      W(204)=RF(204)*XH*XC2H5OH-RB(204)*XH2*XCH3CHOH                    
      W(205)=RF(205)*XH*XC2H5OH-RB(205)*XH2*XCH3CH2O                    
      W(206)=RF(206)*XO*XC2H5OH-RB(206)*XOH*XC2H4OH                     
      W(207)=RF(207)*XO*XC2H5OH-RB(207)*XOH*XCH3CHOH                    
      W(208)=RF(208)*XO*XC2H5OH-RB(208)*XOH*XCH3CH2O                    
      W(209)=RF(209)*XCH3*XC2H5OH-RB(209)*XCH4*XC2H4OH                  
      W(210)=RF(210)*XCH3*XC2H5OH-RB(210)*XCH4*XCH3CHOH                 
      W(211)=RF(211)*XCH3*XC2H5OH-RB(211)*XCH4*XCH3CH2O                 
      W(212)=RF(212)*XHO2*XC2H5OH-RB(212)*XH2O2*XCH3CHOH                
      W(213)=RF(213)*XHO2*XC2H5OH-RB(213)*XH2O2*XC2H4OH                 
      W(214)=RF(214)*XHO2*XC2H5OH-RB(214)*XH2O2*XCH3CH2O                
      W(215)=RF(215)*XCH3CH2O*XM(215)-RB(215)*XH*XCH3HCO*XM(215)        
      W(216)=RF(216)*XCH3CH2O*XM(216)-RB(216)*XCH3*XCH2O*XM(216)        
      W(217)=RF(217)*XO2*XCH3CH2O-RB(217)*XHO2*XCH3HCO                  
      W(218)=RF(218)*XCO*XCH3CH2O-RB(218)*XC2H5*XCO2                    
      W(219)=RF(219)*XH*XCH3CH2O-RB(219)*XCH3*XCH2OH                    
      W(220)=RF(220)*XH*XCH3CH2O-RB(220)*XH2O*XC2H4                     
      W(221)=RF(221)*XOH*XCH3CH2O-RB(221)*XH2O*XCH3HCO                  
      W(222)=RF(222)*XO2*XCH3CHOH-RB(222)*XHO2*XCH3HCO                  
      W(223)=RF(223)*XO2*XCH3CHOH-RB(223)*XHO2*XCH3HCO                  
      W(224)=RF(224)*XO*XCH3CHOH-RB(224)*XOH*XCH3HCO                    
      W(225)=RF(225)*XH*XCH3CHOH-RB(225)*XH2O*XC2H4                     
      W(226)=RF(226)*XH*XCH3CHOH-RB(226)*XCH3*XCH2OH                    
      W(227)=RF(227)*XHO2*XCH3CHOH-RB(227)*XOH*XOH*XCH3HCO              
      W(228)=RF(228)*XOH*XCH3CHOH-RB(228)*XH2O*XCH3HCO                  
      W(229)=RF(229)*XCH3CHOH*XM(229)-RB(229)*XH*XCH3HCO*XM(229)        
      W(230)=RF(230)*XO2*XC2H4OH-RB(230)*XHOC2H4O2                      
      W(231)=RF(231)*XHOC2H4O2-RB(231)*XOH*XCH2O*XCH2O                  
      W(232)=RF(232)*XOH*XC2H4-RB(232)*XC2H4OH                          
      W(233)=RF(233)*XC2H5*XHO2-RB(233)*XOH*XCH3CH2O                    
      W(234)=RF(234)*XCH3OCH3-RB(234)*XCH3*XCH3O                        
      W(235)=RF(235)*XOH*XCH3OCH3-RB(235)*XH2O*XCH3OCH2                 
      W(236)=RF(236)*XH*XCH3OCH3-RB(236)*XH2*XCH3OCH2                   
      W(237)=RF(237)*XCH3*XCH3OCH3-RB(237)*XCH4*XCH3OCH2                
      W(238)=RF(238)*XO*XCH3OCH3-RB(238)*XOH*XCH3OCH2                   
      W(239)=RF(239)*XHO2*XCH3OCH3-RB(239)*XH2O2*XCH3OCH2               
      W(240)=RF(240)*XO2*XCH3OCH3-RB(240)*XHO2*XCH3OCH2                 
      W(241)=RF(241)*XCH3O*XCH3OCH3-RB(241)*XCH3OH*XCH3OCH2             
      W(242)=RF(242)*XCH3OCH3*XCH3OCH2O2-RB(242)*XCH3OCH2*XCH3OCH2O2H   
      W(243)=RF(243)*XCH3OCH2-RB(243)*XCH3*XCH2O                        
      W(244)=RF(244)*XCH3O*XCH3OCH2-RB(244)*XCH2O*XCH3OCH3              
      W(245)=RF(245)*XCH2O*XCH3OCH2-RB(245)*XHCO*XCH3OCH3               
      W(246)=RF(246)*XHO2*XCH3OCH2-RB(246)*XOH*XCH3OCH2O                
      W(247)=RF(247)*XCH3OCH2O-RB(247)*XH*XCH3OCHO                      
      W(248)=RF(248)*XCH3OCHO-RB(248)*XCH3*XOCHO                        
      W(249)=RF(249)*XO2*XCH3OCHO-RB(249)*XHO2*XCH3OCO                  
      W(250)=RF(250)*XOH*XCH3OCHO-RB(250)*XH2O*XCH3OCO                  
      W(251)=RF(251)*XHO2*XCH3OCHO-RB(251)*XH2O2*XCH3OCO                
      W(252)=RF(252)*XO*XCH3OCHO-RB(252)*XOH*XCH3OCO                    
      W(253)=RF(253)*XH*XCH3OCHO-RB(253)*XH2*XCH3OCO                    
      W(254)=RF(254)*XCH3*XCH3OCHO-RB(254)*XCH4*XCH3OCO                 
      W(255)=RF(255)*XCH3O*XCH3OCHO-RB(255)*XCH3OH*XCH3OCO              
      W(256)=RF(256)*XCH3OCO-RB(256)*XCO*XCH3O                          
      W(257)=RF(257)*XCH3OCO-RB(257)*XCH3*XCO2                          
      W(258)=RF(258)*XOCHO*XM(258)-RB(258)*XH*XCO2*XM(258)              
      W(259)=RF(259)*XO2*XCH3OCH2-RB(259)*XCH3OCH2O2                    
      W(260)=RF(260)*XCH2O*XCH3OCH2O2-RB(260)*XHCO*XCH3OCH2O2H          
      W(261)=RF(261)*XCH3OCH2O2*XCH3OCH2O2                              
     & -RB(261)*XO2*XCH3OCH2O*XCH3OCH2O                                        
      W(262)=RF(262)*XCH3OCH2O2*XCH3OCH2O2                              
     & -RB(262)*XO2*XCH3OCHO*XCH3OCH2OH                                        
      W(263)=RF(263)*XCH3OCH2O2H-RB(263)*XOH*XCH3OCH2O                  
      W(264)=RF(264)*XCH3OCH2O-RB(264)*XCH2O*XCH3O                      
      W(265)=RF(265)*XO2*XCH3OCH2O-RB(265)*XHO2*XCH3OCHO                
      W(266)=RF(266)*XCH3OCH2O2-RB(266)*XCH2OCH2O2H                     
      W(267)=RF(267)*XCH2OCH2O2H-RB(267)*XOH*XCH2O*XCH2O                
      W(268)=RF(268)*XO2*XCH2OCH2O2H-RB(268)*XO2CH2OCH2O2H              
      W(269)=RF(269)*XO2CH2OCH2O2H-RB(269)*XOH*XHO2CH2OCHO              
      W(270)=RF(270)*XHO2CH2OCHO-RB(270)*XOH*XOCH2OCHO                  
      W(271)=RF(271)*XOCH2OCHO-RB(271)*XHOCH2OCO                        
      W(272)=RF(272)*XHOCH2OCO-RB(272)*XCO*XHOCH2O                      
      W(273)=RF(273)*XHOCH2OCO-RB(273)*XCH2OH*XCO2                      
      W(274)=RF(274)*XHOCH2O-RB(274)*XH*XHCOOH                          
      W(275)=RF(275)*XOH*XCH2O-RB(275)*XHOCH2O                          
      W(276)=RF(276)*XHCOOH*XM(276)-RB(276)*XH2O*XCO*XM(276)            
      W(277)=RF(277)*XHCOOH*XM(277)-RB(277)*XH2*XCO2*XM(277)            
      W(278)=RF(278)*XHCOOH-RB(278)*XOH*XHCO                            
      W(279)=RF(279)*XOH*XHCOOH-RB(279)*XH*XH2O*XCO2                    
      W(280)=RF(280)*XOH*XHCOOH-RB(280)*XOH*XH2O*XCO                    
      W(281)=RF(281)*XH*XHCOOH-RB(281)*XH*XH2*XCO2                      
      W(282)=RF(282)*XH*XHCOOH-RB(282)*XH2*XOH*XCO                      
      W(283)=RF(283)*XCH3*XHCOOH-RB(283)*XCH4*XOH*XCO                   
      W(284)=RF(284)*XHO2*XHCOOH-RB(284)*XOH*XCO*XH2O2                  
      W(285)=RF(285)*XO*XHCOOH-RB(285)*XOH*XOH*XCO                      

      RETURN
      END

      SUBROUTINE STEADYS(KK, XCON, KSS, XSS,
     &  XOCH2OCHO, XHCCOH, XHOCH2O, XOCHO, XC2H, XC2H3, XCH3OCH2, XCH3O,        
     &  XCH2OH, XCH2S, XCH3OCH2O, XCH3OCO, XCH3CO, XCH2OCH2O2H,                 
     &  XO2CH2OCH2O2H, XC2H4OH, XHOC2H4O2, XCH3CH2O, XC2H5OH, XCH3CHOH,         
     &  XHCO, XCH2CO, XCH2HCO, XHCCO, XCH3HCO )                                 

!*****double precision
        IMPLICIT DOUBLE PRECISION (A-H, O-Z), INTEGER (I-N)
!*****END double precision
!*****single precision
!       IMPLICIT REAL (A-H, O-Z), INTEGER (I-N)
!*****END single precision

      DIMENSION XCON(*), XSS(*)

      SUM=0.
      DO K=1, KK
        SUM= SUM + XCON(K)
      END DO
! Steady State Species
      XSS(1)= XOCH2OCHO / SUM                                                   
      XSS(2)= XHCCOH / SUM                                                      
      XSS(3)= XHOCH2O / SUM                                                     
      XSS(4)= XOCHO / SUM                                                       
      XSS(5)= XC2H / SUM                                                        
      XSS(6)= XC2H3 / SUM                                                       
      XSS(7)= XCH3OCH2 / SUM                                                    
      XSS(8)= XCH3O / SUM                                                       
      XSS(9)= XCH2OH / SUM                                                      
      XSS(10)= XCH2S / SUM                                                      
      XSS(11)= XCH3OCH2O / SUM                                                  
      XSS(12)= XCH3OCO / SUM                                                    
      XSS(13)= XCH3CO / SUM                                                     
      XSS(14)= XCH2OCH2O2H / SUM                                                
      XSS(15)= XO2CH2OCH2O2H / SUM                                              
      XSS(16)= XC2H4OH / SUM                                                    
      XSS(17)= XHOC2H4O2 / SUM                                                  
      XSS(18)= XCH3CH2O / SUM                                                   
      XSS(19)= XC2H5OH / SUM                                                    
      XSS(20)= XCH3CHOH / SUM                                                   
      XSS(21)= XHCO / SUM                                                       
      XSS(22)= XCH2CO / SUM                                                     
      XSS(23)= XCH2HCO / SUM                                                    
      XSS(24)= XHCCO / SUM                                                      
      XSS(25)= XCH3HCO / SUM                                                    

      RETURN
      END
      SUBROUTINE LUDCMP(A,N,NP,INDX,D,VV,KS)
      IMPLICIT DOUBLE PRECISION (A-H, O-Z), INTEGER (I-N)
      PARAMETER (TINY=1.0D-20)
      DIMENSION A(NP,NP),INDX(N),VV(N)
        D=1.
        KS=0
      DO 12 I=1,N
        AAMAX=0.
      DO 11 J=1,N
         IF (ABS(A(I,J)).GT.AAMAX) AAMAX=ABS(A(I,J))
 11    CONTINUE
       IF (AAMAX.EQ.0.) THEN
         KS=1
       RETURN
       END IF
       VV(I)=1./AAMAX
 12    CONTINUE
      DO 19 J=1,N
       IF (J.GT.1) THEN
      DO 14 I=1,J-1
          SUM=A(I,J)
         IF (I.GT.1)THEN
      DO 13 K=1,I-1
            SUM=SUM-A(I,K)*A(K,J)
 13         CONTINUE
             A(I,J)=SUM
          ENDIF
 14       CONTINUE
        ENDIF
        AAMAX=0.
        DO 16 I=J,N
         SUM=A(I,J)
         IF (J.GT.1)THEN
           DO 15 K=1,J-1
             SUM=SUM-A(I,K)*A(K,J)
 15        CONTINUE
           A(I,J)=SUM
         ENDIF
         DUM=VV(I)*ABS(SUM)
         IF (DUM.GE.AAMAX) THEN
           IMAX=I
           AAMAX=DUM
         ENDIF
 16     CONTINUE
       IF (J.NE.IMAX)THEN
         DO 17 K=1,N
           DUM=A(IMAX,K)
           A(IMAX,K)=A(J,K)
           A(J,K)=DUM
 17       CONTINUE
         D=-D
         VV(IMAX)=VV(J)
       ENDIF
        INDX(J)=IMAX
       IF(J.NE.N)THEN
         IF(A(J,J).EQ.0.)A(J,J)=TINY
         DUM=1./A(J,J)
         DO 18 I=J+1,N
           A(I,J)=A(I,J)*DUM
 18       CONTINUE
       ENDIF
 19   CONTINUE
      IF(A(N,N).EQ.0.)A(N,N)=TINY
      RETURN
      END
      SUBROUTINE LUBKSB(A,N,NP,INDX,B)
      IMPLICIT DOUBLE PRECISION (A-H, O-Z), INTEGER (I-N)
      DIMENSION A(NP,NP),INDX(N),B(N)
       II=0
      DO 12 I=1,N
       LL=INDX(I)
       SUM=B(LL)
       B(LL)=B(I)
       IF (II.NE.0)THEN
         DO 11 J=II,I-1
           SUM=SUM-A(I,J)*B(J)
 11       CONTINUE
       ELSE IF (SUM.NE.0.) THEN
         II=I
       ENDIF
       B(I)=SUM
 12    CONTINUE
      DO 14 I=N,1,-1
        SUM=B(I)
       IF(I.LT.N)THEN
         DO 13 J=I+1,N
           SUM=SUM-A(I,J)*B(J)
 13       CONTINUE
       ENDIF
       B(I)=SUM/A(I,I)
 14   CONTINUE
      RETURN
      END

!  Determinant for 2x2 matrix
      SUBROUTINE DET2(A11,A12,A21,A22, DET)
      IMPLICIT NONE
!    INPUT: A11,A12,A21,A22
!    OUTPUT: DET
      REAL*8 A11,A12,A21,A22
      REAL*8 DET
      DET= A11*A22-A12*A21
      RETURN
      END

!  DETERMINANT FOR 3X3 MATRIX
      SUBROUTINE DET3(A11,A12,A13,A21,A22,A23,A31,A32,A33,DET)
      IMPLICIT NONE
!    INPUT: A11,A12,A13,A21,A22,A23,A31,A32,A33
!    OUTPUT: DET
      REAL*8 A11,A12,A13,A21,A22,A23,A31,A32,A33
      REAL*8 DET

      DET= A11*(A22*A33-A32*A23)-A12*(A21*A33-A31*A23)+
     &       A13*(A21*A32-A31*A22)
      RETURN
      END
