# Supplementary material for: Development and Validation of a Reduced DME Mechanism Applicable to Various Combustion Modes in Internal Combustion Engines
Source: Hindawi journal article supplement (doi:10.1155/2011/630580), 2011-01-01
Supplement: f1 [file 630580.f1.zip › reduced.mec]

ELEMENTS
 C   H   O   N  
END
SPECIES
H          H2         CH2        CH3        O          CH4        OH            
H2O        C2H2       CO         C2H4       C2H5       CH2O       C2H6          
O2         CH3OH      HO2        H2O2       CO2        HCOOH      CH3OCH3       
CH3OCHO    CH3OCH2OH  HOCH2OCO   CH3OCH2O2  CH3OCH2O2H HO2CH2OCHO N2            
END
REACTIONS
END
